# Supplementary material for: Quantum-mechanical treatment of thermal effects on the structure and 13C NMR shielding of buckminsterfullerene C60
Source: Royal Society of Chemistry journal article supplement (doi:10.1039/d5cp01484k), 2025-01-01
Supplement: d5cp01484k1.xlsx [file d5cp01484k1.xlsx]

## Sheet: Thermal_expansion_coefficient
Volumetric expansion coefficient, computed from effective geometries obtained at PBE0/pcSseg-1 level
T (K)	β (1/K)
0	1.30612e-07
1	1.29425e-07
2	1.28231e-07
3	1.27031e-07
4	1.25825e-07
5	1.24613e-07
6	1.23394e-07
7	1.22169e-07
8	1.20937e-07
9	1.19699e-07
10	1.18455e-07
11	1.17204e-07
12	1.15947e-07
13	1.14684e-07
14	1.13414e-07
15	1.12138e-07
16	1.10855e-07
17	1.09567e-07
18	1.08271e-07
19	1.0697e-07
20	1.05662e-07
21	1.04348e-07
22	1.03027e-07
23	1.017e-07
24	1.00367e-07
25	9.90276e-08
26	9.76817e-08
27	9.63294e-08
28	9.49707e-08
29	9.36057e-08
30	9.22343e-08
31	9.08566e-08
32	8.94725e-08
33	8.80821e-08
34	8.66853e-08
35	8.52822e-08
36	8.38727e-08
37	8.24569e-08
38	8.10347e-08
39	7.96061e-08
40	7.81712e-08
41	7.673e-08
42	7.52824e-08
43	7.38284e-08
44	7.23681e-08
45	7.09015e-08
46	6.94284e-08
47	6.79491e-08
48	6.64634e-08
49	6.49713e-08
50	6.34729e-08
51	6.20264e-08
52	6.06902e-08
53	5.94643e-08
54	5.83487e-08
55	5.73433e-08
56	5.64482e-08
57	5.56634e-08
58	5.49889e-08
59	5.44246e-08
60	5.39706e-08
61	5.36269e-08
62	5.33935e-08
63	5.32703e-08
64	5.32574e-08
65	5.33548e-08
66	5.35625e-08
67	5.38804e-08
68	5.43086e-08
69	5.48471e-08
70	5.54958e-08
71	5.62549e-08
72	5.71242e-08
73	5.81038e-08
74	5.91936e-08
75	6.03937e-08
76	6.17041e-08
77	6.31248e-08
78	6.46558e-08
79	6.6297e-08
80	6.80485e-08
81	6.96406e-08
82	7.08036e-08
83	7.15375e-08
84	7.18422e-08
85	7.17179e-08
86	7.11645e-08
87	7.01819e-08
88	6.87703e-08
89	6.69295e-08
90	6.46597e-08
91	6.19607e-08
92	5.88326e-08
93	5.52755e-08
94	5.12892e-08
95	4.68738e-08
96	4.20293e-08
97	3.67558e-08
98	3.10531e-08
99	2.49213e-08
100	1.83604e-08
101	1.17234e-08
102	5.36341e-09
103	-7.19654e-10
104	-6.52577e-09
105	-1.20549e-08
106	-1.73071e-08
107	-2.22824e-08
108	-2.69807e-08
109	-3.14021e-08
110	-3.55465e-08
111	-3.9414e-08
112	-4.30045e-08
113	-4.6318e-08
114	-4.93546e-08
115	-5.21143e-08
116	-5.4597e-08
117	-5.68028e-08
118	-5.87316e-08
119	-6.03834e-08
120	-6.17583e-08
121	-6.3096e-08
122	-6.4636e-08
123	-6.63784e-08
124	-6.83231e-08
125	-7.04703e-08
126	-7.28198e-08
127	-7.53718e-08
128	-7.81261e-08
129	-8.10828e-08
130	-8.42419e-08
131	-8.76034e-08
132	-9.11672e-08
133	-9.49335e-08
134	-9.89021e-08
135	-1.03073e-07
136	-1.07447e-07
137	-1.12022e-07
138	-1.16801e-07
139	-1.21781e-07
140	-1.26964e-07
141	-1.32349e-07
142	-1.37937e-07
143	-1.43727e-07
144	-1.4972e-07
145	-1.55915e-07
146	-1.62312e-07
147	-1.68912e-07
148	-1.75714e-07
149	-1.82718e-07
150	-1.89925e-07
151	-1.97155e-07
152	-2.0423e-07
153	-2.1115e-07
154	-2.17915e-07
155	-2.24524e-07
156	-2.30978e-07
157	-2.37277e-07
158	-2.43421e-07
159	-2.49409e-07
160	-2.55242e-07
161	-2.6092e-07
162	-2.66442e-07
163	-2.71809e-07
164	-2.77021e-07
165	-2.82078e-07
166	-2.86979e-07
167	-2.91725e-07
168	-2.96316e-07
169	-3.00752e-07
170	-3.05032e-07
171	-3.09157e-07
172	-3.13127e-07
173	-3.16941e-07
174	-3.206e-07
175	-3.24104e-07
176	-3.27453e-07
177	-3.30646e-07
178	-3.33684e-07
179	-3.36567e-07
180	-3.39295e-07
181	-3.41935e-07
182	-3.44555e-07
183	-3.47154e-07
184	-3.49734e-07
185	-3.52294e-07
186	-3.54833e-07
187	-3.57352e-07
188	-3.59852e-07
189	-3.62331e-07
190	-3.6479e-07
191	-3.67229e-07
192	-3.69648e-07
193	-3.72047e-07
194	-3.74426e-07
195	-3.76784e-07
196	-3.79123e-07
197	-3.81442e-07
198	-3.8374e-07
199	-3.86018e-07
200	-3.88277e-07
201	-3.9047e-07
202	-3.92554e-07
203	-3.94528e-07
204	-3.96392e-07
205	-3.98147e-07
206	-3.99792e-07
207	-4.01327e-07
208	-4.02753e-07
209	-4.04069e-07
210	-4.05275e-07
211	-4.06372e-07
212	-4.07359e-07
213	-4.08236e-07
214	-4.09004e-07
215	-4.09662e-07
216	-4.1021e-07
217	-4.10648e-07
218	-4.10977e-07
219	-4.11196e-07
220	-4.11306e-07
221	-4.11306e-07
222	-4.11196e-07
223	-4.10976e-07
224	-4.10647e-07
225	-4.10208e-07
226	-4.0966e-07
227	-4.09002e-07
228	-4.08234e-07
229	-4.07356e-07
230	-4.06369e-07
231	-4.05272e-07
232	-4.04065e-07
233	-4.02749e-07
234	-4.01323e-07
235	-3.99787e-07
236	-3.98142e-07
237	-3.96387e-07
238	-3.94522e-07
239	-3.92548e-07
240	-3.90463e-07
241	-3.8827e-07
242	-3.85966e-07
243	-3.83553e-07
244	-3.8103e-07
245	-3.78398e-07
246	-3.75656e-07
247	-3.72804e-07
248	-3.69842e-07
249	-3.66771e-07
250	-3.6359e-07
251	-3.60206e-07
252	-3.56527e-07
253	-3.52552e-07
254	-3.48281e-07
255	-3.43714e-07
256	-3.38852e-07
257	-3.33693e-07
258	-3.28239e-07
259	-3.2249e-07
260	-3.16444e-07
261	-3.10297e-07
262	-3.04242e-07
263	-2.9828e-07
264	-2.92411e-07
265	-2.86634e-07
266	-2.80949e-07
267	-2.75357e-07
268	-2.69858e-07
269	-2.64451e-07
270	-2.59136e-07
271	-2.53914e-07
272	-2.48785e-07
273	-2.43748e-07
274	-2.38804e-07
275	-2.33952e-07
276	-2.29193e-07
277	-2.24526e-07
278	-2.19952e-07
279	-2.15471e-07
280	-2.11082e-07
281	-2.06694e-07
282	-2.02217e-07
283	-1.97651e-07
284	-1.92996e-07
285	-1.88252e-07
286	-1.83418e-07
287	-1.78495e-07
288	-1.73482e-07
289	-1.68381e-07
290	-1.6319e-07
291	-1.5791e-07
292	-1.5254e-07
293	-1.47082e-07
294	-1.41534e-07
295	-1.35896e-07
296	-1.3017e-07
297	-1.24354e-07
298	-1.18449e-07
299	-1.12455e-07
300	-1.06371e-07
301	-1.00142e-07
302	-9.37101e-08
303	-8.70762e-08
304	-8.024e-08
305	-7.32016e-08
306	-6.59609e-08
307	-5.85179e-08
308	-5.08726e-08
309	-4.30251e-08
310	-3.49753e-08
311	-2.67232e-08
312	-1.82689e-08
313	-9.61225e-09
314	-7.53366e-10
315	8.30779e-09
316	1.75712e-08
317	2.70369e-08
318	3.67049e-08
319	4.65751e-08
320	5.66476e-08
321	6.67188e-08
322	7.65849e-08
323	8.62461e-08
324	9.57022e-08
325	1.04953e-07
326	1.14e-07
327	1.22841e-07
328	1.31477e-07
329	1.39908e-07
330	1.48134e-07
331	1.56155e-07
332	1.63972e-07
333	1.71583e-07
334	1.78989e-07
335	1.8619e-07
336	1.93186e-07
337	1.99977e-07
338	2.06564e-07
339	2.12945e-07
340	2.19121e-07
341	2.25671e-07
342	2.33172e-07
343	2.41626e-07
344	2.51031e-07
345	2.61389e-07
346	2.72698e-07
347	2.84959e-07
348	2.98173e-07
349	3.12338e-07
350	3.27455e-07
351	3.42711e-07
352	3.57293e-07
353	3.71202e-07
354	3.84436e-07
355	3.96996e-07
356	4.08883e-07
357	4.20096e-07
358	4.30634e-07
359	4.40499e-07
360	4.4969e-07
361	4.58582e-07
362	4.67549e-07
363	4.76591e-07
364	4.85709e-07
365	4.94903e-07
366	5.04171e-07
367	5.13515e-07
368	5.22935e-07
369	5.3243e-07
370	5.42e-07
371	5.51646e-07
372	5.61367e-07
373	5.71163e-07
374	5.81035e-07
375	5.90982e-07
376	6.01005e-07
377	6.11103e-07
378	6.21276e-07
379	6.31525e-07
380	6.41849e-07
381	6.52249e-07
382	6.62724e-07
383	6.73274e-07
384	6.839e-07
385	6.94601e-07
386	7.05378e-07
387	7.1623e-07
388	7.27157e-07
389	7.3816e-07
390	7.49238e-07
391	7.60391e-07
392	7.7162e-07
393	7.82924e-07
394	7.94304e-07
395	8.05759e-07
396	8.17289e-07
397	8.28895e-07
398	8.40576e-07
399	8.52333e-07
400	8.64165e-07
401	8.76031e-07
402	8.87891e-07
403	8.99744e-07
404	9.11591e-07
405	9.23431e-07
406	9.35265e-07
407	9.47092e-07
408	9.58913e-07
409	9.70727e-07
410	9.82534e-07
411	9.94335e-07
412	1.00613e-06
413	1.01792e-06
414	1.0297e-06
415	1.04147e-06
416	1.05324e-06
417	1.065e-06
418	1.07676e-06
419	1.08851e-06
420	1.10025e-06
421	1.11199e-06
422	1.12372e-06
423	1.13544e-06
424	1.14715e-06
425	1.15886e-06
426	1.17057e-06
427	1.18226e-06
428	1.19395e-06
429	1.20564e-06
430	1.21731e-06
431	1.22899e-06
432	1.24065e-06
433	1.25231e-06
434	1.26396e-06
435	1.2756e-06
436	1.28724e-06
437	1.29887e-06
438	1.31049e-06
439	1.32211e-06
440	1.33372e-06
441	1.34533e-06
442	1.35693e-06
443	1.36852e-06
444	1.38011e-06
445	1.39168e-06
446	1.40326e-06
447	1.41482e-06
448	1.42638e-06
449	1.43793e-06
450	1.44948e-06
451	1.46102e-06
452	1.47255e-06
453	1.48408e-06
454	1.4956e-06
455	1.50711e-06
456	1.51862e-06
457	1.53012e-06
458	1.54161e-06
459	1.5531e-06
460	1.56458e-06
461	1.57606e-06
462	1.58752e-06
463	1.59898e-06
464	1.61044e-06
465	1.62189e-06
466	1.63333e-06
467	1.64476e-06
468	1.65619e-06
469	1.66761e-06
470	1.67903e-06
471	1.69044e-06
472	1.70184e-06
473	1.71323e-06
474	1.72462e-06
475	1.73601e-06
476	1.74738e-06
477	1.75875e-06
478	1.77011e-06
479	1.78147e-06
480	1.79282e-06
481	1.80416e-06
482	1.8155e-06
483	1.82683e-06
484	1.83815e-06
485	1.84947e-06
486	1.86078e-06
487	1.87208e-06
488	1.88338e-06
489	1.89467e-06
490	1.90596e-06
491	1.91723e-06
492	1.9285e-06
493	1.93977e-06
494	1.95103e-06
495	1.96228e-06
496	1.97352e-06
497	1.98476e-06
498	1.99599e-06
499	2.00722e-06
500	2.01844e-06

## Sheet: Shielding_of_C60_and_CH4
Shielding of one 13C at C60 and a reference shielding of 13C from CH4 (ppm) at PBE0/pcSseg-1 level
Contributions from effective geometry (eff), vibrational corrections (vib) and the total shielding (total).
		C60			CH4
T (K)	eff	vib	total	eff	vib	total
0	36.1947	-2.3869	33.8078	187.112	-0.5871	186.524
50	36.1941	-2.387	33.8072	187.092	-0.588	186.504
100	36.1934	-2.3943	33.7991	187.072	-0.5889	186.483
150	36.1918	-2.4286	33.7632	187.052	-0.5897	186.463
200	36.1887	-2.5005	33.6882	187.033	-0.5905	186.442
260	36.182	-2.6347	33.5473	187.01	-0.5903	186.419
280	36.1787	-2.6895	33.4893	187.003	-0.5897	186.413
300	36.1749	-2.7486	33.4264	186.996	-0.5887	186.407
320	36.1706	-2.8117	33.3589	186.989	-0.5872	186.402
340	36.1656	-2.8783	33.2873	186.983	-0.5851	186.398
400	36.1466	-3.0968	33.0498	186.967	-0.5754	186.391

## Sheet: Relative_volumes
Relative volumes (ΔV/V0=(V-V0)/V0) for C60 with one 13C atom with different functional/basis set combinations
	Relative volumes in units of 1e-5
	PBE/pcseg-1	PBE/pcSseg-0	PBE/pcSseg-1	PBE0/pcSseg-0	PBE0/pcSseg-1
V0(Å3)	190.808	191.792	190.333	187.325	186.059
T (K)
0	0	0	0	0	0
20	0.137	0.223	0.15	0.16	0.237
50	0.444	0.474	0.468	0.507	0.492
80	0.655	0.729	0.705	0.758	0.664
100	0.75	0.877	0.81	0.835	0.779
120	0.662	0.8	0.742	0.765	0.717
150	0.294	0.307	0.325	0.231	0.385
180	-0.469	-0.709	-0.49	-0.894	-0.443
200	-1.084	-1.579	-1.228	-1.88	-1.172
250	-2.584	-3.681	-2.876	-4.953	-3.166
260	-2.698	-4.102	-3.096	-5.486	-3.509
280	-2.85	-4.542	-3.436	-6.653	-4.03
300	-2.661	-4.75	-3.339	-7.466	-4.353
320	-2.099	-4.496	-2.956	-8.043	-4.416
340	-1.04	-3.839	-2.008	-8.27	-4.127
350	-0.351	-3.388	-1.434	-8.314	-3.862
360	0.451	-2.716	-0.73	-8.164	-3.468
400	5.014	1.195	3.436	-6.63	-0.88
450	13.728	9.304	11.616	-2.036	4.911
500	25.869	20.806	23.083	5.479	13.588

## Sheet: Isotope_shifts
Isotope shifts computed with pcSseg-1 basis set using different functionals.
Contributions from effective geometry (eff), vibrational corrections (vib) and the total isotope shifts (total). Units: ppb
PBE0 functional		1∆HH			1∆HP
T (K)	eff	vib	total	eff	vib	total
0	-1.7407	14.1081	12.3674	3.0227	5.8516	8.8743
50	-1.8063	14.1069	12.3006	2.9811	5.8494	8.8304
100	-1.7163	14.0089	12.2927	3.0191	5.7418	8.7609
150	-1.4645	13.6168	12.1522	3.2215	5.343	8.5645
200	-1.1936	12.9819	11.7883	3.4138	4.7128	8.1266
260	-1.2163	12.1425	10.9262	3.3738	3.8487	7.2224
280	-1.2171	11.8779	10.6607	3.3393	3.5574	6.8967
300	-1.3603	11.6268	10.2665	3.2971	3.2696	6.5667
320	-1.5239	11.3913	9.8674	3.2754	2.9874	6.2628
340	-1.5804	11.1743	9.5939	3.138	2.708	5.846
400	-2.1895	10.63	8.4406	2.7944	1.9166	4.711
PBE functional		1∆HH			1∆HP
T (K)	eff	vib	total	eff	vib	total
0	11.7595	14.4403	26.1998	5.5499	11.677	17.2269
100	11.8186	14.3571	26.1757
260	13.0328	13.1914	26.2242	5.0384	10.7848	15.8232
300	13.396	13.0061	26.4021	4.7253	10.6853	15.4105
340	13.7178	12.9151	26.6329	4.3491	10.6533	15.0024

## Sheet: Effective_geometry_vibrational
Normal mode contributions to geometry: vibrational contributions.
For one 13C in C60. Calculated at PBE0/pcSseg-1 level. Units: a.u.
Mode	Freq (Ha)\ T (K)	0	20	50	80	100	120	150	180	200	250	260	280	300	320	340	350	360	400	450	500
1	0.0075	-0.0001	-0.0001	-0.0001	-0.0001	-0.0001	-0.0001	-0.0001	-0.0001	-0.0001	-0.0001	-0.0001	-0.0001	-0.0001	-0.0001	-0.0001	-0.0001	-0.0001	-0.0001	-0.0001	-0.0001
2	0.0075	-0.0002	-0.0002	-0.0002	-0.0002	-0.0002	-0.0002	-0.0002	-0.0002	-0.0002	-0.0002	-0.0002	-0.0002	-0.0002	-0.0002	-0.0002	-0.0002	-0.0002	-0.0003	-0.0003	-0.0003
3	0.0075	0	0	0	0	0	0	0	0	0	-0.0001	-0.0001	-0.0001	-0.0001	-0.0001	-0.0001	-0.0001	-0.0001	-0.0001	-0.0001	-0.0001
4	0.0075	0.0001	0.0001	0.0001	0.0001	0.0001	0.0001	0.0001	0.0001	0.0001	0.0002	0.0002	0.0002	0.0002	0.0002	0.0002	0.0002	0.0002	0.0002	0.0002	0.0002
5	0.0075	0.0001	0.0001	0.0001	0.0001	0.0001	0.0001	0.0001	0.0001	0.0001	0.0001	0.0001	0.0002	0.0002	0.0002	0.0002	0.0002	0.0002	0.0002	0.0003	0.0003
6	0.0075	0	0	0	0	0	0	0	0	0	0	0	0	0	0	0	0	0	0.0001	0.0001	0.0001
7	0.0075	-0.0001	-0.0001	-0.0001	-0.0001	-0.0001	-0.0001	-0.0001	-0.0001	-0.0001	-0.0001	-0.0001	-0.0001	-0.0001	-0.0001	-0.0001	-0.0001	-0.0001	-0.0001	-0.0001	-0.0001
8	0.0075	0.0001	0.0001	0.0001	0.0001	0.0001	0.0001	0.0001	0.0001	0.0001	0.0001	0.0001	0.0001	0.0001	0.0001	0.0001	0.0001	0.0001	0.0001	0.0002	0.0002
9	0.0075	0	0	0	0	0	0	0	0	0	0	0	0	0	0	0	0.0001	0.0001	0.0001	0.0001	0.0001
10	0.0074	-0.0002	-0.0002	-0.0002	-0.0002	-0.0002	-0.0002	-0.0002	-0.0002	-0.0002	-0.0003	-0.0003	-0.0003	-0.0003	-0.0003	-0.0004	-0.0004	-0.0004	-0.0005	-0.0005	-0.0006
11	0.0072	0.0001	0.0001	0.0001	0.0001	0.0001	0.0001	0.0001	0.0001	0.0001	0.0001	0.0001	0.0001	0.0001	0.0001	0.0001	0.0001	0.0001	0.0001	0.0001	0.0002
12	0.0072	0	0	0	0	0	0	0	0	0	0	0	0	0	0	0	0	0	0	0	0
13	0.0072	0.0002	0.0002	0.0002	0.0002	0.0002	0.0002	0.0002	0.0002	0.0002	0.0002	0.0003	0.0003	0.0003	0.0003	0.0004	0.0004	0.0004	0.0004	0.0005	0.0006
14	0.0071	0.0002	0.0002	0.0002	0.0002	0.0002	0.0002	0.0002	0.0002	0.0002	0.0002	0.0002	0.0003	0.0003	0.0003	0.0003	0.0003	0.0003	0.0003	0.0003	0.0004
15	0.0071	-0.0001	-0.0001	-0.0001	-0.0001	-0.0001	-0.0001	-0.0001	-0.0001	-0.0001	-0.0001	-0.0001	-0.0001	-0.0001	-0.0001	-0.0001	-0.0001	-0.0001	-0.0002	-0.0002	-0.0002
16	0.0071	0.0001	0.0001	0.0001	0.0001	0.0001	0.0001	0.0001	0.0001	0.0001	0.0001	0.0001	0.0001	0.0001	0.0001	0.0001	0.0001	0.0001	0.0001	0.0001	0.0001
17	0.0071	0	0	0	0	0	0	0	-0.0001	-0.0001	-0.0001	-0.0001	-0.0002	-0.0002	-0.0002	-0.0002	-0.0003	-0.0003	-0.0003	-0.0004	-0.0005
18	0.007	0.0047	0.0047	0.0047	0.0047	0.0047	0.0047	0.0047	0.0046	0.0045	0.0043	0.0042	0.0041	0.0039	0.0037	0.0035	0.0034	0.0033	0.0027	0.002	0.0012
19	0.0068	-0.0001	-0.0001	-0.0001	-0.0001	-0.0001	-0.0001	-0.0001	-0.0001	-0.0001	-0.0001	-0.0001	-0.0001	-0.0001	-0.0001	-0.0001	-0.0001	-0.0001	-0.0002	-0.0002	-0.0002
20	0.0068	0	0	0	0	0	0	0	0	0	0	0	0	0	0	0	0	0	-0.0001	-0.0001	-0.0001
21	0.0068	0	0	0	0	0	0	0	0	0	0	0	0	0	0	0	0	0	0	0	0
22	0.0068	0	0	0	0	0	0	0	0	0	0	0	0	0	0	0	0	0	0	0	0
23	0.0068	0	0	0	0	0	0	0	0	0	0	0	0	0	0	0	0	0	0	0	0
24	0.0068	0	0	0	0	0	0	0	0	0	0	0	0	0	0	0	0	0	0	0	0
25	0.0068	0.0002	0.0002	0.0002	0.0002	0.0002	0.0002	0.0002	0.0002	0.0002	0.0002	0.0002	0.0002	0.0002	0.0003	0.0003	0.0003	0.0003	0.0003	0.0003	0.0003
26	0.0068	-0.0001	-0.0001	-0.0001	-0.0001	-0.0001	-0.0001	-0.0001	-0.0001	-0.0001	-0.0001	-0.0001	-0.0001	-0.0001	-0.0001	0	0	0	0	0	0
27	0.0068	0	0	0	0	0	0	0	0	0	0	0	0	0	0	0	0	0	0	0	0
28	0.0068	0.0002	0.0002	0.0002	0.0002	0.0002	0.0002	0.0002	0.0002	0.0002	0.0002	0.0002	0.0002	0.0002	0.0002	0.0002	0.0002	0.0002	0.0002	0.0002	0.0003
29	0.0068	0	0	0	0	0	0	0	0	0	0	0	0	0	0	0	0	0	0	0	0
30	0.0067	0.0004	0.0004	0.0004	0.0004	0.0004	0.0004	0.0004	0.0004	0.0004	0.0004	0.0004	0.0005	0.0005	0.0005	0.0005	0.0005	0.0005	0.0005	0.0006	0.0006
31	0.0064	0	0	0	0	0	0	0	0	0	0	0	0	0	0	0	0	0	0	0	0
32	0.0064	0	0	0	0	0	0	0	0	0	0	0	0	0	0	0	0	0	0.0001	0.0001	0.0001
33	0.0064	-0.0002	-0.0002	-0.0002	-0.0002	-0.0002	-0.0002	-0.0002	-0.0002	-0.0003	-0.0003	-0.0003	-0.0003	-0.0003	-0.0003	-0.0003	-0.0003	-0.0003	-0.0003	-0.0004	-0.0004
34	0.0064	-0.0001	-0.0001	-0.0001	-0.0001	-0.0001	-0.0001	-0.0001	0	0	0	0	0	0	0	0	0	0	0	0	0
35	0.0064	0.0002	0.0002	0.0002	0.0002	0.0002	0.0002	0.0002	0.0002	0.0002	0.0002	0.0002	0.0002	0.0002	0.0002	0.0002	0.0002	0.0002	0.0002	0.0002	0.0002
36	0.0064	0	0	0	0	0	0	0	0	0	0	0	0	0	0	0	0	0	0	0	0
37	0.0064	0	0	0	0	0	0	0	0	0	-0.0001	-0.0001	-0.0001	-0.0001	-0.0001	-0.0001	-0.0001	-0.0001	-0.0001	-0.0002	-0.0002
38	0.0064	0.0001	0.0001	0.0001	0.0001	0.0001	0.0001	0.0001	0.0002	0.0002	0.0002	0.0002	0.0002	0.0002	0.0002	0.0002	0.0002	0.0002	0.0003	0.0003	0.0003
39	0.0062	0.0001	0.0001	0.0001	0.0001	0.0001	0.0001	0.0001	0.0001	0.0002	0.0002	0.0002	0.0002	0.0002	0.0002	0.0002	0.0002	0.0002	0.0003	0.0003	0.0003
40	0.0062	-0.0001	-0.0001	-0.0001	-0.0001	-0.0001	-0.0001	-0.0001	-0.0001	-0.0002	-0.0002	-0.0002	-0.0002	-0.0002	-0.0002	-0.0002	-0.0002	-0.0002	-0.0003	-0.0003	-0.0003
41	0.0062	0	0	0	0	0	0	0	0	0	0	0	0	0	0	0	0	0	0	0	0
42	0.0062	0.0001	0.0001	0.0001	0.0001	0.0001	0.0001	0.0001	0.0001	0.0001	0.0002	0.0002	0.0002	0.0002	0.0002	0.0002	0.0002	0.0002	0.0002	0.0002	0.0003
43	0.0062	0.0001	0.0001	0.0001	0.0001	0.0001	0.0001	0.0001	0.0001	0.0001	0.0001	0.0001	0.0001	0	0	0	0	0	0	0	0
44	0.0062	-0.0001	-0.0001	-0.0001	-0.0001	-0.0001	-0.0001	-0.0001	-0.0001	-0.0001	-0.0001	-0.0001	-0.0001	-0.0001	-0.0002	-0.0002	-0.0002	-0.0002	-0.0002	-0.0003	-0.0003
45	0.0062	0.0001	0.0001	0.0001	0.0001	0.0001	0.0001	0.0001	0.0001	0.0001	0.0001	0.0001	0.0001	0.0001	0.0001	0.0001	0.0001	0.0001	0.0002	0.0002	0.0002
46	0.0062	0.0001	0.0001	0.0001	0.0001	0.0001	0.0001	0.0001	0.0002	0.0002	0.0002	0.0002	0.0002	0.0002	0.0002	0.0002	0.0003	0.0003	0.0003	0.0003	0.0004
47	0.006	0	0	0	0	0	0	0	0	0	0	0	0	-0.0001	-0.0001	-0.0001	-0.0001	-0.0001	-0.0001	-0.0001	-0.0001
48	0.006	0.0001	0.0001	0.0001	0.0001	0.0001	0.0001	0.0001	0.0001	0.0001	0.0001	0	0	0	0	0	0	0	0	0	-0.0001
49	0.006	-0.0001	-0.0001	-0.0001	-0.0001	-0.0001	-0.0001	-0.0002	-0.0002	-0.0002	-0.0002	-0.0002	-0.0002	-0.0002	-0.0002	-0.0002	-0.0002	-0.0002	-0.0003	-0.0003	-0.0003
50	0.006	-0.0002	-0.0002	-0.0002	-0.0002	-0.0002	-0.0002	-0.0002	-0.0002	-0.0002	-0.0002	-0.0002	-0.0002	-0.0002	-0.0002	-0.0002	-0.0002	-0.0002	-0.0002	-0.0002	-0.0002
51	0.006	0	0	0	0	0	0	0	0	0	0.0001	0.0001	0.0001	0.0001	0.0001	0.0001	0.0001	0.0001	0.0002	0.0002	0.0002
52	0.006	0	0	0	0	0	0	0	0	0	0	0	0	0	0	0	0	0	0	0	0
53	0.006	-0.0002	-0.0002	-0.0002	-0.0002	-0.0002	-0.0002	-0.0002	-0.0002	-0.0002	-0.0002	-0.0002	-0.0002	-0.0002	-0.0003	-0.0003	-0.0003	-0.0003	-0.0003	-0.0003	-0.0003
54	0.0059	-0.0002	-0.0002	-0.0002	-0.0002	-0.0002	-0.0002	-0.0002	-0.0002	-0.0002	-0.0002	-0.0002	-0.0002	-0.0003	-0.0003	-0.0003	-0.0003	-0.0003	-0.0003	-0.0004	-0.0004
55	0.0058	0.0001	0.0001	0.0001	0.0001	0.0001	0.0001	0.0001	0.0001	0.0001	0.0001	0.0002	0.0002	0.0002	0.0002	0.0002	0.0002	0.0002	0.0003	0.0003	0.0004
56	0.0058	0.0001	0.0001	0.0001	0.0001	0.0001	0.0001	0.0001	0.0001	0.0001	0.0001	0.0001	0.0001	0.0001	0.0001	0.0001	0.0002	0.0002	0.0002	0.0002	0.0002
57	0.0058	-0.0002	-0.0002	-0.0002	-0.0002	-0.0002	-0.0002	-0.0002	-0.0002	-0.0002	-0.0002	-0.0002	-0.0002	-0.0002	-0.0002	-0.0003	-0.0003	-0.0003	-0.0003	-0.0003	-0.0004
58	0.0058	0	0	0	0	0	0	0	0	0	0	0	0	0	0	0	0	-0.0001	-0.0001	-0.0001	-0.0001
59	0.0058	-0.0002	-0.0002	-0.0002	-0.0002	-0.0002	-0.0002	-0.0002	-0.0003	-0.0003	-0.0003	-0.0003	-0.0003	-0.0004	-0.0004	-0.0004	-0.0004	-0.0004	-0.0005	-0.0006	-0.0006
60	0.0056	0	0	0	0	0	0	0	0	0	0	0	0	0	0	0.0001	0.0001	0.0001	0.0001	0.0001	0.0001
61	0.0056	0.0002	0.0002	0.0002	0.0002	0.0002	0.0002	0.0002	0.0002	0.0002	0.0002	0.0002	0.0002	0.0002	0.0002	0.0002	0.0002	0.0002	0.0002	0.0002	0.0002
62	0.0056	0	0	0	0	0	0	0	0	0	-0.0001	-0.0001	-0.0001	-0.0001	-0.0001	-0.0001	-0.0001	-0.0001	-0.0001	-0.0002	-0.0002
63	0.0056	-0.0001	-0.0001	-0.0001	-0.0001	-0.0001	-0.0001	-0.0001	-0.0001	-0.0001	-0.0001	-0.0001	-0.0001	-0.0001	-0.0001	-0.0001	-0.0001	-0.0001	-0.0001	-0.0001	-0.0001
64	0.0056	-0.0001	-0.0001	-0.0001	-0.0001	-0.0001	-0.0001	-0.0001	-0.0001	-0.0001	-0.0001	-0.0001	-0.0001	-0.0001	-0.0001	-0.0001	-0.0001	-0.0001	0	0	0
65	0.0056	0.0002	0.0002	0.0002	0.0002	0.0002	0.0002	0.0002	0.0002	0.0002	0.0002	0.0002	0.0003	0.0003	0.0003	0.0003	0.0003	0.0003	0.0003	0.0004	0.0004
66	0.0052	0.0001	0.0001	0.0001	0.0001	0.0001	0.0001	0.0001	0.0001	0.0001	0.0001	0.0001	0	0	0	0	0	0	-0.0001	-0.0001	-0.0002
67	0.0052	0.0001	0.0001	0.0001	0.0001	0.0001	0.0001	0.0001	0.0001	0.0001	0.0001	0.0001	0.0001	0.0001	0.0001	0.0002	0.0002	0.0002	0.0002	0.0002	0.0003
68	0.0052	-0.0002	-0.0002	-0.0002	-0.0002	-0.0002	-0.0002	-0.0002	-0.0002	-0.0002	-0.0002	-0.0002	-0.0002	-0.0002	-0.0002	-0.0002	-0.0002	-0.0002	-0.0002	-0.0002	-0.0002
69	0.0052	0.0001	0.0001	0.0001	0.0001	0.0001	0.0001	0.0001	0.0001	0.0001	0.0002	0.0002	0.0002	0.0002	0.0002	0.0002	0.0003	0.0003	0.0003	0.0004	0.0004
70	0.0052	-0.0002	-0.0002	-0.0002	-0.0002	-0.0002	-0.0002	-0.0002	-0.0002	-0.0002	-0.0002	-0.0002	-0.0002	-0.0002	-0.0002	-0.0002	-0.0002	-0.0002	-0.0002	-0.0002	-0.0002
71	0.0051	-0.0001	-0.0001	-0.0001	-0.0001	-0.0001	-0.0001	-0.0001	-0.0001	-0.0001	-0.0001	-0.0001	-0.0001	-0.0001	-0.0001	-0.0001	-0.0002	-0.0002	-0.0002	-0.0002	-0.0003
72	0.0051	0	0	0	0	0	0	0	0	0	0	0	-0.0001	-0.0001	-0.0001	-0.0001	-0.0001	-0.0001	-0.0001	-0.0002	-0.0002
73	0.0051	-0.0001	-0.0001	-0.0001	-0.0001	-0.0001	-0.0001	-0.0001	-0.0001	-0.0001	-0.0002	-0.0002	-0.0002	-0.0002	-0.0002	-0.0002	-0.0002	-0.0002	-0.0002	-0.0002	-0.0003
74	0.0051	-0.0003	-0.0003	-0.0003	-0.0003	-0.0003	-0.0003	-0.0003	-0.0004	-0.0004	-0.0004	-0.0004	-0.0004	-0.0004	-0.0005	-0.0005	-0.0005	-0.0005	-0.0005	-0.0006	-0.0006
75	0.0046	0.0001	0.0001	0.0001	0.0001	0.0001	0.0001	0.0001	0.0002	0.0002	0.0002	0.0002	0.0003	0.0003	0.0003	0.0003	0.0004	0.0004	0.0004	0.0005	0.0006
76	0.0046	0.0001	0.0001	0.0001	0.0001	0.0001	0.0001	0.0001	0.0001	0	0	0	0	0	0	-0.0001	-0.0001	-0.0001	-0.0001	-0.0001	-0.0002
77	0.0046	-0.0001	-0.0001	-0.0001	-0.0001	-0.0001	-0.0001	-0.0001	-0.0001	-0.0001	-0.0001	-0.0001	-0.0001	-0.0001	-0.0001	-0.0001	-0.0001	0	0	0	0
78	0.0045	0.0001	0.0001	0.0001	0.0001	0.0001	0.0001	0.0001	0.0001	0.0002	0.0002	0.0002	0.0002	0.0002	0.0002	0.0003	0.0003	0.0003	0.0003	0.0004	0.0004
79	0.0045	-0.0002	-0.0002	-0.0002	-0.0002	-0.0002	-0.0002	-0.0002	-0.0002	-0.0002	-0.0001	-0.0001	-0.0001	-0.0001	-0.0001	-0.0001	-0.0001	-0.0001	0	0	0.0001
80	0.0045	-0.0001	-0.0001	-0.0001	-0.0001	-0.0001	-0.0001	-0.0001	-0.0001	-0.0001	-0.0002	-0.0002	-0.0002	-0.0002	-0.0002	-0.0002	-0.0002	-0.0002	-0.0002	-0.0002	-0.0002
81	0.0045	0	0	0	0	0	0	0	0	0	0	0	0	0	0	0	0	0	-0.0001	-0.0001	-0.0001
82	0.0044	0	0	0	0	0	0	0	0	0.0001	0.0001	0.0001	0.0001	0.0001	0.0001	0.0001	0.0001	0.0001	0.0001	0.0001	0.0001
83	0.0039	-0.0009	-0.0009	-0.0009	-0.0009	-0.0009	-0.0009	-0.0009	-0.0009	-0.0009	-0.0009	-0.0009	-0.0009	-0.0009	-0.0009	-0.0009	-0.0009	-0.0009	-0.0009	-0.0009	-0.0008
84	0.0039	0.0002	0.0002	0.0002	0.0002	0.0002	0.0002	0.0002	0.0002	0.0001	0.0001	0.0001	0.0001	0.0001	0.0001	0.0001	0.0001	0.0001	0.0001	0.0001	0.0001
85	0.0039	0.0001	0.0001	0.0001	0.0001	0.0001	0.0001	0.0001	0.0001	0.0001	0.0001	0.0001	0.0001	0.0001	0.0001	0.0001	0.0001	0.0001	0.0001	0.0001	0.0001
86	0.0038	-0.0011	-0.0011	-0.0011	-0.0011	-0.0011	-0.0011	-0.0011	-0.0011	-0.0011	-0.0011	-0.0011	-0.0011	-0.0011	-0.0011	-0.0011	-0.001	-0.001	-0.001	-0.001	-0.001
87	0.0037	0	0	0	0	0	0	0	0	0	0	0	0	0	0	0	0	0	0	0	0
88	0.0037	-0.0001	-0.0001	-0.0001	-0.0001	-0.0001	-0.0001	-0.0001	-0.0001	-0.0001	-0.0001	-0.0001	-0.0001	-0.0001	-0.0001	-0.0001	-0.0001	-0.0001	-0.0001	-0.0001	-0.0001
89	0.0037	-0.0003	-0.0003	-0.0003	-0.0003	-0.0003	-0.0003	-0.0003	-0.0003	-0.0003	-0.0003	-0.0003	-0.0003	-0.0003	-0.0003	-0.0004	-0.0004	-0.0004	-0.0004	-0.0004	-0.0004
90	0.0036	0.0001	0.0001	0.0001	0.0001	0.0001	0.0001	0.0001	0.0001	0.0001	0.0002	0.0002	0.0002	0.0002	0.0002	0.0002	0.0002	0.0002	0.0002	0.0003	0.0003
91	0.0036	-0.0001	-0.0001	-0.0001	-0.0001	-0.0001	-0.0001	-0.0001	-0.0001	-0.0001	-0.0001	-0.0001	0	0	0	0	0	0	0	0	0
92	0.0036	-0.0001	-0.0001	-0.0001	-0.0001	-0.0001	-0.0001	-0.0001	-0.0001	-0.0001	0	0	0	0	0.0001	0.0001	0.0001	0.0001	0.0002	0.0003	0.0004
93	0.0036	0.0002	0.0002	0.0002	0.0002	0.0002	0.0002	0.0002	0.0003	0.0003	0.0004	0.0004	0.0005	0.0005	0.0006	0.0006	0.0006	0.0007	0.0008	0.0009	0.0011
94	0.0036	0.0003	0.0003	0.0003	0.0003	0.0003	0.0003	0.0003	0.0003	0.0003	0.0003	0.0003	0.0003	0.0003	0.0003	0.0004	0.0004	0.0004	0.0004	0.0004	0.0004
95	0.0035	0.0002	0.0002	0.0002	0.0002	0.0002	0.0002	0.0002	0.0002	0.0002	0.0002	0.0002	0.0002	0.0002	0.0002	0.0002	0.0002	0.0002	0.0002	0.0002	0.0002
96	0.0035	-0.0001	-0.0001	-0.0001	-0.0001	-0.0001	-0.0001	-0.0001	-0.0001	-0.0001	-0.0001	-0.0001	-0.0001	-0.0001	-0.0001	-0.0001	-0.0001	-0.0001	-0.0001	0	0
97	0.0035	0.0001	0.0001	0.0001	0.0001	0.0001	0.0001	0.0001	0.0001	0.0001	0.0001	0.0001	0.0001	0.0002	0.0002	0.0002	0.0002	0.0002	0.0002	0.0003	0.0003
98	0.0035	0.0001	0.0001	0.0001	0.0001	0.0001	0.0001	0.0001	0.0001	0.0001	0.0001	0.0001	0.0002	0.0002	0.0002	0.0002	0.0002	0.0002	0.0002	0.0002	0.0003
99	0.0033	-0.0001	-0.0001	-0.0001	-0.0001	-0.0001	-0.0001	-0.0001	-0.0001	-0.0001	-0.0001	-0.0001	-0.0001	-0.0001	-0.0001	-0.0001	-0.0001	-0.0001	-0.0001	-0.0001	-0.0001
100	0.0033	-0.0003	-0.0003	-0.0003	-0.0003	-0.0003	-0.0003	-0.0003	-0.0003	-0.0003	-0.0003	-0.0003	-0.0003	-0.0003	-0.0003	-0.0003	-0.0003	-0.0003	-0.0003	-0.0003	-0.0004
101	0.0033	0.0002	0.0002	0.0002	0.0002	0.0002	0.0002	0.0002	0.0002	0.0002	0.0002	0.0002	0.0002	0.0002	0.0002	0.0002	0.0002	0.0002	0.0002	0.0002	0.0002
102	0.0033	-0.0001	-0.0001	-0.0001	-0.0001	-0.0001	-0.0001	-0.0001	-0.0001	-0.0001	-0.0001	-0.0001	-0.0001	-0.0001	-0.0001	0	0	0	0	0	0
103	0.0033	-0.0002	-0.0002	-0.0002	-0.0002	-0.0002	-0.0002	-0.0002	-0.0002	-0.0002	-0.0002	-0.0002	-0.0002	-0.0002	-0.0002	-0.0002	-0.0002	-0.0002	-0.0002	-0.0002	-0.0002
104	0.0032	0.0004	0.0004	0.0004	0.0004	0.0004	0.0004	0.0005	0.0005	0.0005	0.0005	0.0005	0.0005	0.0005	0.0005	0.0005	0.0005	0.0005	0.0005	0.0005	0.0006
105	0.0032	-0.0002	-0.0002	-0.0002	-0.0002	-0.0002	-0.0002	-0.0002	-0.0002	-0.0002	-0.0003	-0.0003	-0.0003	-0.0003	-0.0003	-0.0003	-0.0003	-0.0003	-0.0003	-0.0003	-0.0002
106	0.0032	0.0002	0.0002	0.0002	0.0002	0.0002	0.0001	0.0001	0.0001	0.0001	0.0001	0.0001	0.0001	0.0001	0.0001	0.0001	0.0001	0.0001	0.0001	0.0001	0.0001
107	0.0032	-0.0002	-0.0002	-0.0002	-0.0002	-0.0002	-0.0002	-0.0002	-0.0002	-0.0002	-0.0002	-0.0002	-0.0002	-0.0002	-0.0002	-0.0002	-0.0002	-0.0002	-0.0002	-0.0002	-0.0002
108	0.0032	0.0002	0.0002	0.0002	0.0002	0.0002	0.0002	0.0002	0.0002	0.0002	0.0002	0.0002	0.0002	0.0002	0.0002	0.0003	0.0003	0.0003	0.0003	0.0003	0.0003
109	0.0032	-0.0002	-0.0002	-0.0002	-0.0002	-0.0002	-0.0002	-0.0002	-0.0002	-0.0002	-0.0002	-0.0002	-0.0002	-0.0002	-0.0003	-0.0003	-0.0003	-0.0003	-0.0003	-0.0003	-0.0003
110	0.0032	0.0001	0.0001	0.0001	0.0001	0.0001	0.0001	0.0001	0.0001	0.0001	0.0001	0.0001	0.0001	0	0	0	0	0	0	0	0
111	0.0032	0.0001	0.0001	0.0001	0.0001	0.0001	0.0001	0.0001	0.0001	0.0001	0.0001	0.0001	0.0001	0.0001	0.0001	0.0001	0.0001	0.0001	0.0001	0.0001	0.0001
112	0.0032	0.0003	0.0003	0.0003	0.0003	0.0003	0.0003	0.0003	0.0004	0.0004	0.0004	0.0004	0.0004	0.0005	0.0005	0.0005	0.0005	0.0005	0.0005	0.0006	0.0006
113	0.0032	0.0002	0.0002	0.0002	0.0002	0.0002	0.0002	0.0002	0.0002	0.0002	0.0002	0.0002	0.0002	0.0002	0.0002	0.0002	0.0002	0.0002	0.0002	0.0002	0.0002
114	0.0032	0.0004	0.0004	0.0004	0.0004	0.0004	0.0004	0.0004	0.0005	0.0005	0.0005	0.0005	0.0005	0.0006	0.0006	0.0006	0.0006	0.0006	0.0007	0.0008	0.0009
115	0.0031	0	0	0	0	0	-0.0001	-0.0001	-0.0001	-0.0001	-0.0001	-0.0001	-0.0001	-0.0001	-0.0001	-0.0001	-0.0001	-0.0001	-0.0001	-0.0001	-0.0002
116	0.0031	-0.0003	-0.0003	-0.0003	-0.0003	-0.0003	-0.0003	-0.0003	-0.0003	-0.0003	-0.0003	-0.0003	-0.0003	-0.0003	-0.0003	-0.0003	-0.0003	-0.0003	-0.0002	-0.0002	-0.0002
117	0.0031	-0.0005	-0.0005	-0.0005	-0.0005	-0.0005	-0.0005	-0.0005	-0.0005	-0.0005	-0.0005	-0.0005	-0.0005	-0.0005	-0.0005	-0.0005	-0.0005	-0.0005	-0.0005	-0.0005	-0.0005
118	0.0031	0.0004	0.0004	0.0004	0.0004	0.0004	0.0004	0.0004	0.0004	0.0004	0.0004	0.0004	0.0004	0.0004	0.0004	0.0004	0.0004	0.0004	0.0004	0.0004	0.0004
119	0.0031	0.0004	0.0004	0.0004	0.0004	0.0004	0.0003	0.0003	0.0003	0.0003	0.0004	0.0004	0.0004	0.0004	0.0004	0.0004	0.0004	0.0004	0.0004	0.0004	0.0004
120	0.0029	0.0011	0.0011	0.0011	0.0011	0.0011	0.0011	0.0011	0.0011	0.0011	0.0011	0.0011	0.0012	0.0012	0.0012	0.0012	0.0012	0.0012	0.0012	0.0012	0.0012
121	0.0027	-0.0002	-0.0002	-0.0002	-0.0002	-0.0002	-0.0002	-0.0002	-0.0002	-0.0002	-0.0002	-0.0003	-0.0003	-0.0003	-0.0003	-0.0003	-0.0003	-0.0003	-0.0003	-0.0004	-0.0004
122	0.0027	0.0002	0.0002	0.0002	0.0002	0.0002	0.0002	0.0002	0.0002	0.0002	0.0001	0.0001	0.0001	0	0	0	0	0	-0.0001	-0.0002	-0.0003
123	0.0027	0.001	0.001	0.001	0.001	0.001	0.001	0.001	0.0009	0.0009	0.0008	0.0008	0.0007	0.0006	0.0006	0.0005	0.0005	0.0004	0.0003	0.0001	0
124	0.0027	0.0003	0.0003	0.0003	0.0003	0.0003	0.0003	0.0003	0.0003	0.0003	0.0003	0.0003	0.0003	0.0003	0.0003	0.0003	0.0003	0.0003	0.0003	0.0003	0.0003
125	0.0027	-0.0003	-0.0003	-0.0003	-0.0003	-0.0003	-0.0003	-0.0004	-0.0004	-0.0004	-0.0004	-0.0004	-0.0004	-0.0004	-0.0004	-0.0004	-0.0004	-0.0004	-0.0005	-0.0005	-0.0005
126	0.0027	-0.0001	-0.0001	-0.0001	-0.0001	-0.0001	-0.0001	-0.0001	-0.0001	-0.0001	-0.0001	-0.0001	-0.0001	0	0	0	0	0	0	0	0
127	0.0026	0.0009	0.0009	0.0009	0.0009	0.0009	0.0009	0.0009	0.0009	0.0008	0.0008	0.0008	0.0008	0.0008	0.0008	0.0007	0.0007	0.0007	0.0007	0.0007	0.0006
128	0.0026	0.0001	0.0001	0.0001	0.0001	0.0001	0.0001	0.0001	0.0001	0.0001	0.0001	0.0001	0.0001	0.0001	0.0001	0.0001	0.0001	0.0001	0.0001	0.0001	0.0001
129	0.0026	0	0	0	0	0	0	0	0	0	0.0001	0.0001	0.0001	0.0002	0.0002	0.0002	0.0002	0.0002	0.0003	0.0004	0.0004
130	0.0026	0.0005	0.0005	0.0005	0.0005	0.0005	0.0005	0.0005	0.0005	0.0005	0.0005	0.0005	0.0005	0.0005	0.0005	0.0005	0.0005	0.0005	0.0005	0.0006	0.0006
131	0.0026	-0.0008	-0.0008	-0.0008	-0.0008	-0.0008	-0.0008	-0.0008	-0.0008	-0.0008	-0.0007	-0.0007	-0.0007	-0.0007	-0.0007	-0.0007	-0.0007	-0.0007	-0.0006	-0.0006	-0.0006
132	0.0026	0.001	0.001	0.001	0.001	0.001	0.001	0.001	0.001	0.0011	0.0011	0.0011	0.0011	0.0012	0.0012	0.0012	0.0012	0.0012	0.0013	0.0013	0.0014
133	0.0026	0.0005	0.0005	0.0005	0.0005	0.0005	0.0005	0.0005	0.0005	0.0005	0.0005	0.0005	0.0004	0.0004	0.0004	0.0004	0.0004	0.0004	0.0004	0.0004	0.0004
134	0.0026	0.0016	0.0016	0.0016	0.0016	0.0016	0.0016	0.0016	0.0016	0.0016	0.0016	0.0015	0.0015	0.0015	0.0015	0.0015	0.0015	0.0015	0.0015	0.0015	0.0015
135	0.0026	0.001	0.001	0.001	0.001	0.001	0.001	0.001	0.001	0.0009	0.0009	0.0009	0.0009	0.0009	0.0009	0.0009	0.0009	0.0009	0.0009	0.0009	0.0009
136	0.0026	0.0001	0.0001	0.0001	0.0001	0.0001	0.0001	0.0001	0.0001	0.0001	0.0001	0.0001	0.0001	0.0001	0.0001	0.0001	0.0001	0.0001	0.0001	0.0001	0
137	0.0025	0.0015	0.0015	0.0015	0.0015	0.0015	0.0015	0.0015	0.0015	0.0015	0.0015	0.0015	0.0015	0.0015	0.0015	0.0015	0.0015	0.0015	0.0014	0.0014	0.0014
138	0.0025	-0.0004	-0.0004	-0.0004	-0.0004	-0.0004	-0.0004	-0.0004	-0.0004	-0.0004	-0.0004	-0.0004	-0.0004	-0.0004	-0.0004	-0.0005	-0.0005	-0.0005	-0.0005	-0.0005	-0.0005
139	0.0025	-0.0006	-0.0006	-0.0006	-0.0006	-0.0006	-0.0006	-0.0006	-0.0006	-0.0006	-0.0006	-0.0006	-0.0006	-0.0006	-0.0006	-0.0006	-0.0006	-0.0006	-0.0006	-0.0006	-0.0006
140	0.0025	0	0	0	0.0001	0.0001	0.0001	0.0001	0.0001	0.0001	0.0001	0.0001	0.0001	0.0001	0.0001	0.0002	0.0002	0.0002	0.0002	0.0002	0.0003
141	0.0025	0.0036	0.0036	0.0036	0.0036	0.0036	0.0036	0.0036	0.0036	0.0036	0.0035	0.0035	0.0035	0.0035	0.0035	0.0035	0.0035	0.0035	0.0035	0.0034	0.0034
142	0.0025	0.0033	0.0033	0.0033	0.0033	0.0033	0.0033	0.0033	0.0033	0.0033	0.0033	0.0033	0.0032	0.0032	0.0032	0.0032	0.0032	0.0032	0.0032	0.0031	0.0031
143	0.0024	0.0011	0.0011	0.0011	0.0011	0.0011	0.001	0.001	0.001	0.0009	0.0008	0.0008	0.0008	0.0007	0.0007	0.0006	0.0006	0.0006	0.0005	0.0004	0.0002
144	0.0024	-0.0003	-0.0003	-0.0003	-0.0003	-0.0003	-0.0003	-0.0003	-0.0003	-0.0002	-0.0002	-0.0002	-0.0002	-0.0002	-0.0002	-0.0002	-0.0002	-0.0002	-0.0002	-0.0002	-0.0002
145	0.0024	0.0013	0.0013	0.0013	0.0013	0.0013	0.0013	0.0012	0.0012	0.0012	0.0012	0.0012	0.0012	0.0012	0.0012	0.0011	0.0011	0.0011	0.0011	0.0011	0.0011
146	0.0024	-0.0005	-0.0005	-0.0005	-0.0005	-0.0005	-0.0005	-0.0005	-0.0005	-0.0005	-0.0005	-0.0005	-0.0005	-0.0005	-0.0005	-0.0005	-0.0005	-0.0005	-0.0005	-0.0005	-0.0006
147	0.0024	0.0026	0.0026	0.0026	0.0026	0.0026	0.0026	0.0026	0.0026	0.0026	0.0026	0.0026	0.0026	0.0026	0.0026	0.0026	0.0026	0.0026	0.0026	0.0027	0.0027
148	0.0023	0.5182	0.5182	0.5182	0.5182	0.5181	0.518	0.5176	0.5169	0.5164	0.5149	0.5147	0.5142	0.5139	0.5138	0.5139	0.514	0.5142	0.5155	0.5187	0.5236
149	0.0023	-0.0106	-0.0106	-0.0106	-0.0106	-0.0106	-0.0106	-0.0106	-0.0106	-0.0105	-0.0105	-0.0105	-0.0105	-0.0105	-0.0105	-0.0106	-0.0106	-0.0106	-0.0106	-0.0107	-0.0108
150	0.0022	0.0036	0.0036	0.0036	0.0036	0.0036	0.0036	0.0036	0.0036	0.0036	0.0036	0.0036	0.0036	0.0037	0.0037	0.0037	0.0037	0.0037	0.0037	0.0038	0.0039
151	0.0022	0.0018	0.0018	0.0018	0.0018	0.0018	0.0018	0.0018	0.0018	0.0018	0.0019	0.0019	0.0019	0.0019	0.002	0.002	0.002	0.002	0.0021	0.0022	0.0023
152	0.0022	0.0095	0.0095	0.0095	0.0095	0.0095	0.0095	0.0095	0.0095	0.0095	0.0095	0.0095	0.0095	0.0095	0.0095	0.0095	0.0095	0.0095	0.0096	0.0097	0.0098
153	0.002	0.0008	0.0008	0.0008	0.0008	0.0008	0.0008	0.0008	0.0008	0.0008	0.0008	0.0008	0.0008	0.0008	0.0009	0.0009	0.0009	0.0009	0.0009	0.0009	0.0009
154	0.002	0.0007	0.0007	0.0007	0.0007	0.0007	0.0007	0.0007	0.0007	0.0007	0.0007	0.0007	0.0007	0.0007	0.0007	0.0006	0.0006	0.0006	0.0006	0.0006	0.0006
155	0.002	0.0003	0.0003	0.0003	0.0003	0.0003	0.0003	0.0003	0.0003	0.0004	0.0004	0.0004	0.0005	0.0005	0.0005	0.0005	0.0006	0.0006	0.0006	0.0007	0.0008
156	0.002	-0.0006	-0.0006	-0.0006	-0.0006	-0.0006	-0.0006	-0.0006	-0.0007	-0.0007	-0.0008	-0.0008	-0.0008	-0.0009	-0.0009	-0.0009	-0.001	-0.001	-0.0011	-0.0012	-0.0013
157	0.002	-0.0019	-0.0019	-0.0019	-0.0019	-0.002	-0.002	-0.002	-0.002	-0.002	-0.0021	-0.0021	-0.0021	-0.0021	-0.0021	-0.0022	-0.0022	-0.0022	-0.0023	-0.0024	-0.0025
158	0.0019	0.0014	0.0014	0.0014	0.0014	0.0014	0.0014	0.0014	0.0014	0.0014	0.0013	0.0013	0.0013	0.0013	0.0013	0.0013	0.0013	0.0013	0.0013	0.0013	0.0013
159	0.0019	0.0003	0.0003	0.0003	0.0003	0.0003	0.0003	0.0003	0.0003	0.0003	0.0003	0.0003	0.0003	0.0003	0.0003	0.0003	0.0003	0.0003	0.0004	0.0004	0.0004
160	0.0019	-0.0004	-0.0004	-0.0004	-0.0004	-0.0004	-0.0004	-0.0004	-0.0004	-0.0004	-0.0004	-0.0004	-0.0004	-0.0004	-0.0004	-0.0004	-0.0004	-0.0004	-0.0004	-0.0005	-0.0005
161	0.0019	0	0	0	0	0	0	0	-0.0001	-0.0001	-0.0001	-0.0001	-0.0001	-0.0001	-0.0001	-0.0001	-0.0001	-0.0001	-0.0002	-0.0002	-0.0002
162	0.0019	-0.0001	-0.0001	-0.0001	-0.0001	-0.0001	-0.0001	-0.0001	-0.0001	-0.0001	-0.0001	-0.0001	-0.0001	-0.0001	-0.0001	-0.0002	-0.0002	-0.0002	-0.0002	-0.0002	-0.0002
163	0.0017	-0.0005	-0.0005	-0.0005	-0.0005	-0.0005	-0.0005	-0.0005	-0.0006	-0.0006	-0.0006	-0.0006	-0.0006	-0.0006	-0.0006	-0.0006	-0.0006	-0.0006	-0.0007	-0.0007	-0.0007
164	0.0016	0	0	0	0	0	0	0	0	0	0.0001	0.0001	0.0001	0.0001	0.0001	0.0001	0.0001	0.0001	0.0001	0.0002	0.0002
165	0.0016	0.0005	0.0005	0.0005	0.0005	0.0005	0.0005	0.0005	0.0005	0.0006	0.0007	0.0007	0.0007	0.0008	0.0008	0.0009	0.0009	0.001	0.0011	0.0012	0.0014
166	0.0016	0.0009	0.0009	0.0009	0.0009	0.0009	0.0009	0.0009	0.0009	0.0009	0.001	0.001	0.001	0.001	0.0011	0.0011	0.0011	0.0012	0.0013	0.0014	0.0015
167	0.0016	-0.0002	-0.0002	-0.0002	-0.0002	-0.0002	-0.0002	-0.0002	-0.0002	-0.0003	-0.0003	-0.0003	-0.0003	-0.0003	-0.0003	-0.0004	-0.0004	-0.0004	-0.0004	-0.0005	-0.0006
168	0.0016	-0.0011	-0.0011	-0.0011	-0.0011	-0.0012	-0.0012	-0.0012	-0.0013	-0.0014	-0.0015	-0.0016	-0.0017	-0.0017	-0.0018	-0.0019	-0.002	-0.002	-0.0022	-0.0025	-0.0027
169	0.0016	-0.0009	-0.0009	-0.0009	-0.0009	-0.0009	-0.0009	-0.001	-0.001	-0.001	-0.0011	-0.0011	-0.0011	-0.0012	-0.0012	-0.0013	-0.0013	-0.0013	-0.0014	-0.0015	-0.0017
170	0.0012	0.0003	0.0003	0.0003	0.0003	0.0003	0.0003	0.0003	0.0003	0.0003	0.0003	0.0003	0.0003	0.0003	0.0003	0.0003	0.0003	0.0003	0.0004	0.0004	0.0004
171	0.0012	-0.0013	-0.0013	-0.0013	-0.0013	-0.0013	-0.0013	-0.0013	-0.0014	-0.0014	-0.0015	-0.0015	-0.0016	-0.0016	-0.0017	-0.0018	-0.0018	-0.0018	-0.0019	-0.0021	-0.0023
172	0.0012	0.0005	0.0005	0.0005	0.0005	0.0005	0.0005	0.0005	0.0006	0.0006	0.0008	0.0008	0.0009	0.0009	0.001	0.0011	0.0011	0.0012	0.0013	0.0015	0.0018
173	0.0012	-0.0009	-0.0009	-0.0009	-0.0009	-0.0009	-0.0009	-0.0009	-0.001	-0.001	-0.0011	-0.0012	-0.0012	-0.0013	-0.0014	-0.0014	-0.0015	-0.0015	-0.0017	-0.0019	-0.0021
174	0.0012	-0.0012	-0.0012	-0.0012	-0.0012	-0.0012	-0.0012	-0.0012	-0.0012	-0.0013	-0.0014	-0.0014	-0.0015	-0.0016	-0.0017	-0.0017	-0.0018	-0.0018	-0.002	-0.0022	-0.0025

## Sheet: Effective_geometry_centrifugal
Normal mode contributions to geometry: centrifugal distortion contributions.
For one 13C in C60. Calculated at PBE0/pcSseg-1 level. Units: a.u.
Mode	Freq (Ha)\ T (K)	0	20	50	80	100	120	150	180	200	250	260	280	300	320	340	350	360	400	450	500
1	0.0075	0	0	0	0	0	0	0	0	0	0	0	0	0	0	0	0	0	0	0	0
2	0.0075	0	0	0	0	0	0	0	0	0	0	0	0	0	0	0	0	0	0	0	0
3	0.0075	0	0	0	0	0	0	0	0	0	0	0	0	0	0	0	0	0	0	0	0
4	0.0075	0	0	0	0	0	0	0	0	0	0	0	0	0	0	0	0	0	0	0	0
5	0.0075	0	0	0	0	0	0	0	0	0	0	0	0	0	0	0	0	0	0	0	0
6	0.0075	0	0	0	0	0	0	0	0	0	0	0	0	0	0	0	0	0	0	0	0
7	0.0075	0	0	0	0	0	0	0	0	0	0	0	0	0	0	0	0	0	0	0	0
8	0.0075	0	0	0	0	0	0	0	0	0	0	0	0	0	0	0	0	0	0	0	0
9	0.0075	0	0	0	0	0	0	0	0	0	0	0	0	0	0	0	0	0	0	0	0
10	0.0074	0	0	0	0	0	0	0	0	0	0	0	0	0	0	0	0	0	0	0	0
11	0.0072	0	0	0	0	0	0	0	0	0	0	0	0	0	0	0	0	0	0	0	0
12	0.0072	0	0	0	0	0	0	0	0	0	0	0	0	0	0	0	0	0	0	0	0
13	0.0072	0	0	0	0	0	0	0	0	0	0	0	0	0	0	0	0	0	0	0	0
14	0.0071	0	0	0	0	0	0	0	0	0	0	0	0	0	0	0	0	0	0	0	0
15	0.0071	0	0	0	0	0	0	0	0	0	0	0	0	0	0	0	0	0	0	0	0
16	0.0071	0	0	0	0	0	0	0	0	0	0	0	0	0	0	0	0	0	0	0	0
17	0.0071	0	0	0	0	0	0	0	0	0	0	0	0	0	0	0	0	0	0	0	0
18	0.007	0	0	0	0	0	0	0	0	0	0	0	0	0	0	0	0	0	0	0	0
19	0.0068	0	0	0	0	0	0	0	0	0	0	0	0	0	0	0	0	0	0	0	0
20	0.0068	0	0	0	0	0	0	0	0	0	0	0	0	0	0	0	0	0	0	0	0
21	0.0068	0	0	0	0	0	0	0	0	0	0	0	0	0	0	0	0	0	0	0	0
22	0.0068	0	0	0	0	0	0	0	0	0	0	0	0	0	0	0	0	0	0	0	0
23	0.0068	0	0	0	0	0	0	0	0	0	0	0	0	0	0	0	0	0	0	0	0
24	0.0068	0	0	0	0	0	0	0	0	0	0	0	0	0	0	0	0	0	0	0	0
25	0.0068	0	0	0	0	0	0	0	0	0	0	0	0	0	0	0	0	0	0	0	0
26	0.0068	0	0	0	0	0	0	0	0	0	0	0	0	0	0	0	0	0	0	0	0
27	0.0068	0	0	0	0	0	0	0	0	0	0	0	0	0	0	0	0	0	0	0	0
28	0.0068	0	0	0	0	0	0	0	0	0	0	0	0	0	0	0	0	0	0	0	0
29	0.0068	0	0	0	0	0	0	0	0	0	0	0	0	0	0	0	0	0	0	0	0
30	0.0067	0	0	0	0	0	0	0	0	0	0	0	0	0	0	0	0	0	0	0	0
31	0.0064	0	0	0	0	0	0	0	0	0	0	0	0	0	0	0	0	0	0	0	0
32	0.0064	0	0	0	0	0	0	0	0	0	0	0	0	0	0	0	0	0	0	0	0
33	0.0064	0	0	0	0	0	0	0	0	0	0	0	0	0	0	0	0	0	0	0	0
34	0.0064	0	0	0	0	0	0	0	0	0	0	0	0	0	0	0	0	0	0	0	0
35	0.0064	0	0	0	0	0	0	0	0	0	0	0	0	0	0	0	0	0	0	0	0
36	0.0064	0	0	0	0	0	0	0	0	0	0	0	0	0	0	0	0	0	0	0	0
37	0.0064	0	0	0	0	0	0	0	0	0	0	0	0	0	0	0	0	0	0	0	0
38	0.0064	0	0	0	0	0	0	0	0	0	0	0	0	0	0	0	0	0	0	0	0
39	0.0062	0	0	0	0	0	0	0	0	0	0	0	0	0	0	0	0	0	0	0	0
40	0.0062	0	0	0	0	0	0	0	0	0	0	0	0	0	0	0	0	0	0	0	0
41	0.0062	0	0	0	0	0	0	0	0	0	0	0	0	0	0	0	0	0	0	0	0
42	0.0062	0	0	0	0	0	0	0	0	0	0	0	0	0	0	0	0	0	0	0	0
43	0.0062	0	0	0	0	0	0	0	0	0	0	0	0	0	0	0	0	0	0	0	0
44	0.0062	0	0	0	0	0	0	0	0	0	0	0	0	0	0	0	0	0	0	0	0
45	0.0062	0	0	0	0	0	0	0	0	0	0	0	0	0	0	0	0	0	0	0	0
46	0.0062	0	0	0	0	0	0	0	0	0	0	0	0	0	0	0	0	0	0	0	0
47	0.006	0	0	0	0	0	0	0	0	0	0	0	0	0	0	0	0	0	0	0	0
48	0.006	0	0	0	0	0	0	0	0	0	0	0	0	0	0	0	0	0	0	0	0
49	0.006	0	0	0	0	0	0	0	0	0	0	0	0	0	0	0	0	0	0	0	0
50	0.006	0	0	0	0	0	0	0	0	0	0	0	0	0	0	0	0	0	0	0	0
51	0.006	0	0	0	0	0	0	0	0	0	0	0	0	0	0	0	0	0	0	0	0
52	0.006	0	0	0	0	0	0	0	0	0	0	0	0	0	0	0	0	0	0	0	0
53	0.006	0	0	0	0	0	0	0	0	0	0	0	0	0	0	0	0	0	0	0	0
54	0.0059	0	0	0	0	0	0	0	0	0	0	0	0	0	0	0	0	0	0	0	0
55	0.0058	0	0	0	0	0	0	0	0	0	0	0	0	0	0	0	0	0	0	0	0
56	0.0058	0	0	0	0	0	0	0	0	0	0	0	0	0	0	0	0	0	0	0	0
57	0.0058	0	0	0	0	0	0	0	0	0	0	0	0	0	0	0	0	0	0	0	0
58	0.0058	0	0	0	0	0	0	0	0	0	0	0	0	0	0	0	0	0	0	0	0
59	0.0058	0	0	0	0	0	0	0	0	0	0	0	0	0	0	0	0	0	0	0	0
60	0.0056	0	0	0	0	0	0	0	0	0	0	0	0	0	0	0	0	0	0	0	0
61	0.0056	0	0	0	0	0	0	0	0	0	0	0	0	0	0	0	0	0	0	0	0
62	0.0056	0	0	0	0	0	0	0	0	0	0	0	0	0	0	0	0	0	0	0	0
63	0.0056	0	0	0	0	0	0	0	0	0	0	0	0	0	0	0	0	0	0	0	0
64	0.0056	0	0	0	0	0	0	0	0	0	0	0	0	0	0	0	0	0	0	0	0
65	0.0056	0	0	0	0	0	0	0	0	0	0	0	0	0	0	0	0	0	0	0	0
66	0.0052	0	0	0	0	0	0	0	0	0	0	0	0	0	0	0	0	0	0	0	0
67	0.0052	0	0	0	0	0	0	0	0	0	0	0	0	0	0	0	0	0	0	0	0
68	0.0052	0	0	0	0	0	0	0	0	0	0	0	0	0	0	0	0	0	0	0	0
69	0.0052	0	0	0	0	0	0	0	0	0	0	0	0	0	0	0	0	0	0	0	0
70	0.0052	0	0	0	0	0	0	0	0	0	0	0	0	0	0	0	0	0	0	0	0
71	0.0051	0	0	0	0	0	0	0	0	0	0	0	0	0	0	0	0	0	0	0	0
72	0.0051	0	0	0	0	0	0	0	0	0	0	0	0	0	0	0	0	0	0	0	0
73	0.0051	0	0	0	0	0	0	0	0	0	0	0	0	0	0	0	0	0	0	0	0
74	0.0051	0	0	0	0	0	0	0	0	0	0	0	0	0	0	0	0	0	0	0	0
75	0.0046	0	0	0	0	0	0	0	0	0	0	0	0	0	0	0	0	0	0	0	0
76	0.0046	0	0	0	0	0	0	0	0	0	0	0	0	0	0	0	0	0	0	0	0
77	0.0046	0	0	0	0	0	0	0	0	0	0	0	0	0	0	0	0	0	0	0	0
78	0.0045	0	0	0	0	0	0	0	0	0	0	0	0	0	0	0	0	0	0	0	0
79	0.0045	0	0	0	0	0	0	0	0	0	0	0	0	0	0	0	0	0	0	0	0
80	0.0045	0	0	0	0	0	0	0	0	0	0	0	0	0	0	0	0	0	0	0	0
81	0.0045	0	0	0	0	0	0	0	0	0	0	0	0	0	0	0	0	0	0	0	0
82	0.0044	0	0	0	0	0	0	0	0	0	0	0	0	0	0	0	0	0	0	0	0
83	0.0039	0	0	0	0	0	0	0	0	0	0	0	0	0	0	0	0	0	0	0	0
84	0.0039	0	0	0	0	0	0	0	0	0	0	0	0	0	0	0	0	0	0	0	0
85	0.0039	0	0	0	0	0	0	0	0	0	0	0	0	0	0	0	0	0	0	0	0
86	0.0038	0	0	0	0	0	0	0	0	0	0	0	0	0	0	0	0	0	0	0	0
87	0.0037	0	0	0	0	0	0	0	0	0	0	0	0	0	0	0	0	0	0	0	0
88	0.0037	0	0	0	0	0	0	0	0	0	0	0	0	0	0	0	0	0	0	0	0
89	0.0037	0	0	0	0	0	0	0	0	0	0	0	0	0	0	0	0	0	0	0	0
90	0.0036	0	0	0	0	0	0	0	0	0	0	0	0	0	0	0	0	0	0	0	0
91	0.0036	0	0	0	0	0	0	0	0	0	0	0	0	0	0	0	0	0	0	0	0
92	0.0036	0	0	0	0	0	0	0	0	0	0	0	0	0	0	0	0	0	0	0	0
93	0.0036	0	0	0	0	0	0	0	0	0	0	0	0	0	0	0	0	0	0	0	0
94	0.0036	0	0	0	0	0	0	0	0	0	0	0	0	0	0	0	0	0	0	0	0
95	0.0035	0	0	0	0	0	0	0	0	0	0	0	0	0	0	0	0	0	0	0	0
96	0.0035	0	0	0	0	0	0	0	0	0	0	0	0	0	0	0	0	0	0	0	0
97	0.0035	0	0	0	0	0	0	0	0	0	0	0	0	0	0	0	0	0	0	0	0
98	0.0035	0	0	0	0	0	0	0	0	0	0	0	0	0	0	0	0	0	0	0	0
99	0.0033	0	0	0	0	0	0	0	0	0	0	0	0	0	0	0	0	0	0	0	0
100	0.0033	0	0	0	0	0	0	0	0	0	0	0	0	0	0	0	0	0	0	0	0
101	0.0033	0	0	0	0	0	0	0	0	0	0	0	0	0	0	0	0	0	0	0	0
102	0.0033	0	0	0	0	0	0	0	0	0	0	0	0	0	0	0	0	0	0	0	0
103	0.0033	0	0	0	0	0	0	0	0	0	0	0	0	0	0	0	0	0	0	0	0
104	0.0032	0	0	0	0	0	0	0	0	0	0	0	0	0	0	0	0	0	0	0	0
105	0.0032	0	0	0	0	0	0	0	0	0	0	0	0	0	0	0	0	0	0	0	0
106	0.0032	0	0	0	0	0	0	0	0	0	0	0	0	0	0	0	0	0	0	0	0
107	0.0032	0	0	0	0	0	0	0	0	0	0	0	0	0	0	0	0	0	0	0	0
108	0.0032	0	0	0	0	0	0	0	0	0	0	0	0	0	0	0	0	0	0	0	0
109	0.0032	0	0	0	0	0	0	0	0	0	0	0	0	0	0	0	0	0	0	0	0
110	0.0032	0	0	0	0	0	0	0	0	0	0	0	0	0	0	0	0	0	0	0	0
111	0.0032	0	0	0	0	0	0	0	0	0	0	0	0	0	0	0	0	0	0	0	0
112	0.0032	0	0	0	0	0	0	0	0	0	0	0	0	0	0	0	0	0	0	0	0
113	0.0032	0	0	0	0	0	0	0	0	0	0	0	0	0	0	0	0	0	0	0	0
114	0.0032	0	0	0	0	0	0	0	0	0	0	0	0	0	0	0	0	0	0	0	0
115	0.0031	0	0	0	0	0	0	0	0	0	0	0	0	0	0	0	0	0	0	0	0
116	0.0031	0	0	0	0	0	0	0	0	0	0	0	0	0	0	0	0	0	0	0	0
117	0.0031	0	0	0	0	0	0	0	0	0	0	0	0	0	0	0	0	0	0	0	0
118	0.0031	0	0	0	0	0	0	0	0	0	0	0	0	0	0	0	0	0	0	0	0
119	0.0031	0	0	0	0	0	0	0	0	0	0	0	0	0	0	0	0	0	0	0	0
120	0.0029	0	0	0	0	0	0	0	0	0	0	0	0	0	0	0	0	0	0	0	0
121	0.0027	0	0	0	0	0	0	0	0	0	0	0	0	0	0	0	0	0	0	0	0
122	0.0027	0	0	0	0	0	0	0	0	0	0	0	0	0	0	0	0	0	0	0	0
123	0.0027	0	0	0	0	0	0	0	0	0	0	0	0	0	0	0	0	0	0	0	0
124	0.0027	0	0	0	0	0	0	0	0	0	0	0	0	0	0	0	0	0	0	0	0
125	0.0027	0	0	0	0	0	0	0	0	0	0	0	0	0	0	0	0	0	0	0	0
126	0.0027	0	0	0	0	0	0	0	0	0	0	0	0	0	0	0	0	0	0	0	0
127	0.0026	0	0	0	0	0	0	0	0	0	0	0	0	0	0	0	0	0	0	0	0
128	0.0026	0	0	0	0	0	0	0	0	0	0	0	0	0	0	0	0	0	0	0	0
129	0.0026	0	0	0	0	0	0	0	0	0	0	0	0	0	0	0	0	0	0	0	0
130	0.0026	0	0	0	0	0	0	0	0	0	0	0	0	0	0	0	0	0	0	0	0
131	0.0026	0	0	0	0	0	0	0	0	0	0	0	0	0	0	0	0	0	0	0	0
132	0.0026	0	0	0	0	0	0	0	0	0	0	0	0	0	0	0	0	0	0	0	0
133	0.0026	0	0	0	0	0	0	0	0	0	0	0	0	0	0	0	0	0	0	0	0
134	0.0026	0	0	0	0	0	0	0	0	0	0	0	0	0	0	0	0	0	0	0	0
135	0.0026	0	0	0	0	0	0	0	0	0	0	0	0	0	0	0	0	0	0	0	0
136	0.0026	0	0	0	0	0	0	0	0	0	0	0	0	0	0	0	0	0	0	0	0
137	0.0025	0	0	0	0	0	0	0	0	0	0	0	0	0	0	0	0	0	0	0	0
138	0.0025	0	0	0	0	0	0	0	0	0	0	0	0	0	0	0	0	0	0	0	0
139	0.0025	0	0	0	0	0	0	0	0	0	0	0	0	0	0	0	0	0	0	0	0
140	0.0025	0	0	0	0	0	0	0	0	0	0	0	0	0	0	0	0	0	0	0	0
141	0.0025	0	0	0	0	0	0	0	0	0	0	0	0	0	0	0	0	0	0	0	0
142	0.0025	0	0	0	0	0	0	0	0	0	0	0	0	0	0	0	0	0	0	0	0
143	0.0024	0	0	0	0	0	0	0	0	0	0	0	0	0	0	0	0	0	0	0	0
144	0.0024	0	0	0	0	0	0	0	0	0	0	0	0	0	0	0	0	0	0	0	0
145	0.0024	0	0	0	0	0	0	0	0	0	0	0	0	0	0	0	0	0	0	0	0
146	0.0024	0	0	0	0	0	0	0	0	0	0	0	0	0	0	0	0	0	0	0	0
147	0.0024	0	0	0	0	0	0	0	0	0	0	0	0	0	0	0	0	0	0	0	0
148	0.0023	0	0.0001	0.0003	0.0004	0.0005	0.0007	0.0008	0.001	0.0011	0.0014	0.0014	0.0015	0.0016	0.0018	0.0019	0.0019	0.002	0.0022	0.0025	0.0027
149	0.0023	0	0	0	0	0	0	0	0	0	0	0	0	0	0	0	0	0	0	-0.0001	-0.0001
150	0.0022	0	0	0	0	0	0	0	0	0	0	0	0	0	0	0	0	0	0	0	0
151	0.0022	0	0	0	0	0	0	0	0	0	0	0	0	0	0	0	0	0	0	0	0
152	0.0022	0	0	0	0	0	0	0	0	0	0	0	0	0	0	0	0	0	0	0	0.0001
153	0.002	0	0	0	0	0	0	0	0	0	0	0	0	0	0	0	0	0	0	0	0
154	0.002	0	0	0	0	0	0	0	0	0	0	0	0	0	0	0	0	0	0	0	0
155	0.002	0	0	0	0	0	0	0	0	0	0	0	0	0	0	0	0	0	0	0	0
156	0.002	0	0	0	0	0	0	0	0	0	0	0	0	0	0	0	0	0	0	0	0
157	0.002	0	0	0	0	0	0	0	0	0	0	0	0	0	0	0	0	0	0	0	0
158	0.0019	0	0	0	0	0	0	0	0	0	0	0	0	0	0	0	0	0	0	0	0
159	0.0019	0	0	0	0	0	0	0	0	0	0	0	0	0	0	0	0	0	0	0	0
160	0.0019	0	0	0	0	0	0	0	0	0	0	0	0	0	0	0	0	0	0	0	0
161	0.0019	0	0	0	0	0	0	0	0	0	0	0	0	0	0	0	0	0	0	0	0
162	0.0019	0	0	0	0	0	0	0	0	0	0	0	0	0	0	0	0	0	0	0	0
163	0.0017	0	0	0	0	0	0	0	0	0	0	0	0	0	0	0	0	0	0	0	0
164	0.0016	0	0	0	0	0	0	0	0	0	0	0	0	0	0	0	0	0	0	0	0
165	0.0016	0	0	0	0	0	0	0	0	0	0	0	0	0	0	0	0	0	0	0	0
166	0.0016	0	0	0	0	0	0	0	0	0	0	0	0	0	0	0	0	0	0	0	0
167	0.0016	0	0	0	0	0	0	0	0	0	0	0	0	0	0	0	0	0	0	0	0
168	0.0016	0	0	0	0	0	0	0	0	0	0	0	0	0	0	0	0	0	0	0	0
169	0.0016	0	0	0	0	0	0	0	0	0	0	0	0	0	0	0	0	0	0	0	0
170	0.0012	0	0	0	0	0	0	0	0	0	0	0	0	0	0	0	0	0	0	0	0
171	0.0012	0	0	0	0	0	0	0	0	0	0	0	0	0	0	0	0	0	0	0	0
172	0.0012	0	0	0	0	0	0	0	0	0	0	0	0	0	0	0	0	0	0	0	0
173	0.0012	0	0	0	0	0	0	0	0	0	0	0	0	0	0	0	0	0	0	0	0
174	0.0012	0	0	0	0	0	0	0	0	0	0	0	0	0	0	0	0	0	0	0	0

## Sheet: Effective_geometry_total
Normal mode contributions to geometry: total contributions.
For one 13C in C60. Calculated at PBE0/pcSseg-1 level. Units: a.u.
Mode	Freq (Ha)\ T (K)	0	20	50	80	100	120	150	180	200	250	260	280	300	320	340	350	360	400	450	500
1	0.0075	-0.0001	-0.0001	-0.0001	-0.0001	-0.0001	-0.0001	-0.0001	-0.0001	-0.0001	-0.0001	-0.0001	-0.0001	-0.0001	-0.0001	-0.0001	-0.0001	-0.0001	-0.0001	-0.0001	-0.0001
2	0.0075	-0.0002	-0.0002	-0.0002	-0.0002	-0.0002	-0.0002	-0.0002	-0.0002	-0.0002	-0.0002	-0.0002	-0.0002	-0.0002	-0.0002	-0.0002	-0.0002	-0.0002	-0.0003	-0.0003	-0.0003
3	0.0075	0	0	0	0	0	0	0	0	0	-0.0001	-0.0001	-0.0001	-0.0001	-0.0001	-0.0001	-0.0001	-0.0001	-0.0001	-0.0001	-0.0001
4	0.0075	0.0001	0.0001	0.0001	0.0001	0.0001	0.0001	0.0001	0.0001	0.0001	0.0002	0.0002	0.0002	0.0002	0.0002	0.0002	0.0002	0.0002	0.0002	0.0002	0.0002
5	0.0075	0.0001	0.0001	0.0001	0.0001	0.0001	0.0001	0.0001	0.0001	0.0001	0.0001	0.0001	0.0002	0.0002	0.0002	0.0002	0.0002	0.0002	0.0002	0.0003	0.0003
6	0.0075	0	0	0	0	0	0	0	0	0	0	0	0	0	0	0	0	0	0.0001	0.0001	0.0001
7	0.0075	-0.0001	-0.0001	-0.0001	-0.0001	-0.0001	-0.0001	-0.0001	-0.0001	-0.0001	-0.0001	-0.0001	-0.0001	-0.0001	-0.0001	-0.0001	-0.0001	-0.0001	-0.0001	-0.0001	-0.0001
8	0.0075	0.0001	0.0001	0.0001	0.0001	0.0001	0.0001	0.0001	0.0001	0.0001	0.0001	0.0001	0.0001	0.0001	0.0001	0.0001	0.0001	0.0001	0.0001	0.0002	0.0002
9	0.0075	0	0	0	0	0	0	0	0	0	0	0	0	0	0	0	0.0001	0.0001	0.0001	0.0001	0.0001
10	0.0074	-0.0002	-0.0002	-0.0002	-0.0002	-0.0002	-0.0002	-0.0002	-0.0002	-0.0002	-0.0003	-0.0003	-0.0003	-0.0003	-0.0003	-0.0004	-0.0004	-0.0004	-0.0005	-0.0005	-0.0006
11	0.0072	0.0001	0.0001	0.0001	0.0001	0.0001	0.0001	0.0001	0.0001	0.0001	0.0001	0.0001	0.0001	0.0001	0.0001	0.0001	0.0001	0.0001	0.0001	0.0001	0.0002
12	0.0072	0	0	0	0	0	0	0	0	0	0	0	0	0	0	0	0	0	0	0	0
13	0.0072	0.0002	0.0002	0.0002	0.0002	0.0002	0.0002	0.0002	0.0002	0.0002	0.0002	0.0003	0.0003	0.0003	0.0003	0.0004	0.0004	0.0004	0.0004	0.0005	0.0006
14	0.0071	0.0002	0.0002	0.0002	0.0002	0.0002	0.0002	0.0002	0.0002	0.0002	0.0002	0.0002	0.0003	0.0003	0.0003	0.0003	0.0003	0.0003	0.0003	0.0003	0.0004
15	0.0071	-0.0001	-0.0001	-0.0001	-0.0001	-0.0001	-0.0001	-0.0001	-0.0001	-0.0001	-0.0001	-0.0001	-0.0001	-0.0001	-0.0001	-0.0001	-0.0001	-0.0001	-0.0002	-0.0002	-0.0002
16	0.0071	0.0001	0.0001	0.0001	0.0001	0.0001	0.0001	0.0001	0.0001	0.0001	0.0001	0.0001	0.0001	0.0001	0.0001	0.0001	0.0001	0.0001	0.0001	0.0001	0.0001
17	0.0071	0	0	0	0	0	0	0	-0.0001	-0.0001	-0.0001	-0.0001	-0.0002	-0.0002	-0.0002	-0.0002	-0.0003	-0.0003	-0.0003	-0.0004	-0.0005
18	0.007	0.0047	0.0047	0.0047	0.0047	0.0047	0.0047	0.0047	0.0046	0.0045	0.0043	0.0042	0.0041	0.0039	0.0037	0.0035	0.0034	0.0033	0.0027	0.002	0.0012
19	0.0068	-0.0001	-0.0001	-0.0001	-0.0001	-0.0001	-0.0001	-0.0001	-0.0001	-0.0001	-0.0001	-0.0001	-0.0001	-0.0001	-0.0001	-0.0001	-0.0001	-0.0001	-0.0002	-0.0002	-0.0002
20	0.0068	0	0	0	0	0	0	0	0	0	0	0	0	0	0	0	0	0	-0.0001	-0.0001	-0.0001
21	0.0068	0	0	0	0	0	0	0	0	0	0	0	0	0	0	0	0	0	0	0	0
22	0.0068	0	0	0	0	0	0	0	0	0	0	0	0	0	0	0	0	0	0	0	0
23	0.0068	0	0	0	0	0	0	0	0	0	0	0	0	0	0	0	0	0	0	0	0
24	0.0068	0	0	0	0	0	0	0	0	0	0	0	0	0	0	0	0	0	0	0	0
25	0.0068	0.0002	0.0002	0.0002	0.0002	0.0002	0.0002	0.0002	0.0002	0.0002	0.0002	0.0002	0.0002	0.0002	0.0003	0.0003	0.0003	0.0003	0.0003	0.0003	0.0003
26	0.0068	-0.0001	-0.0001	-0.0001	-0.0001	-0.0001	-0.0001	-0.0001	-0.0001	-0.0001	-0.0001	-0.0001	-0.0001	-0.0001	-0.0001	0	0	0	0	0	0
27	0.0068	0	0	0	0	0	0	0	0	0	0	0	0	0	0	0	0	0	0	0	0
28	0.0068	0.0002	0.0002	0.0002	0.0002	0.0002	0.0002	0.0002	0.0002	0.0002	0.0002	0.0002	0.0002	0.0002	0.0002	0.0002	0.0002	0.0002	0.0002	0.0002	0.0003
29	0.0068	0	0	0	0	0	0	0	0	0	0	0	0	0	0	0	0	0	0	0	0
30	0.0067	0.0004	0.0004	0.0004	0.0004	0.0004	0.0004	0.0004	0.0004	0.0004	0.0004	0.0004	0.0005	0.0005	0.0005	0.0005	0.0005	0.0005	0.0005	0.0006	0.0006
31	0.0064	0	0	0	0	0	0	0	0	0	0	0	0	0	0	0	0	0	0	0	0
32	0.0064	0	0	0	0	0	0	0	0	0	0	0	0	0	0	0	0	0	0.0001	0.0001	0.0001
33	0.0064	-0.0002	-0.0002	-0.0002	-0.0002	-0.0002	-0.0002	-0.0002	-0.0002	-0.0003	-0.0003	-0.0003	-0.0003	-0.0003	-0.0003	-0.0003	-0.0003	-0.0003	-0.0003	-0.0004	-0.0004
34	0.0064	-0.0001	-0.0001	-0.0001	-0.0001	-0.0001	-0.0001	-0.0001	0	0	0	0	0	0	0	0	0	0	0	0	0
35	0.0064	0.0002	0.0002	0.0002	0.0002	0.0002	0.0002	0.0002	0.0002	0.0002	0.0002	0.0002	0.0002	0.0002	0.0002	0.0002	0.0002	0.0002	0.0002	0.0002	0.0002
36	0.0064	0	0	0	0	0	0	0	0	0	0	0	0	0	0	0	0	0	0	0	0
37	0.0064	0	0	0	0	0	0	0	0	0	-0.0001	-0.0001	-0.0001	-0.0001	-0.0001	-0.0001	-0.0001	-0.0001	-0.0001	-0.0002	-0.0002
38	0.0064	0.0001	0.0001	0.0001	0.0001	0.0001	0.0001	0.0001	0.0002	0.0002	0.0002	0.0002	0.0002	0.0002	0.0002	0.0002	0.0002	0.0002	0.0003	0.0003	0.0003
39	0.0062	0.0001	0.0001	0.0001	0.0001	0.0001	0.0001	0.0001	0.0001	0.0002	0.0002	0.0002	0.0002	0.0002	0.0002	0.0002	0.0002	0.0002	0.0003	0.0003	0.0003
40	0.0062	-0.0001	-0.0001	-0.0001	-0.0001	-0.0001	-0.0001	-0.0001	-0.0001	-0.0002	-0.0002	-0.0002	-0.0002	-0.0002	-0.0002	-0.0002	-0.0002	-0.0002	-0.0003	-0.0003	-0.0003
41	0.0062	0	0	0	0	0	0	0	0	0	0	0	0	0	0	0	0	0	0	0	0
42	0.0062	0.0001	0.0001	0.0001	0.0001	0.0001	0.0001	0.0001	0.0001	0.0001	0.0002	0.0002	0.0002	0.0002	0.0002	0.0002	0.0002	0.0002	0.0002	0.0002	0.0003
43	0.0062	0.0001	0.0001	0.0001	0.0001	0.0001	0.0001	0.0001	0.0001	0.0001	0.0001	0.0001	0.0001	0	0	0	0	0	0	0	0
44	0.0062	-0.0001	-0.0001	-0.0001	-0.0001	-0.0001	-0.0001	-0.0001	-0.0001	-0.0001	-0.0001	-0.0001	-0.0001	-0.0001	-0.0002	-0.0002	-0.0002	-0.0002	-0.0002	-0.0003	-0.0003
45	0.0062	0.0001	0.0001	0.0001	0.0001	0.0001	0.0001	0.0001	0.0001	0.0001	0.0001	0.0001	0.0001	0.0001	0.0001	0.0001	0.0001	0.0001	0.0002	0.0002	0.0002
46	0.0062	0.0001	0.0001	0.0001	0.0001	0.0001	0.0001	0.0001	0.0002	0.0002	0.0002	0.0002	0.0002	0.0002	0.0002	0.0002	0.0003	0.0003	0.0003	0.0003	0.0004
47	0.006	0	0	0	0	0	0	0	0	0	0	0	0	-0.0001	-0.0001	-0.0001	-0.0001	-0.0001	-0.0001	-0.0001	-0.0001
48	0.006	0.0001	0.0001	0.0001	0.0001	0.0001	0.0001	0.0001	0.0001	0.0001	0.0001	0	0	0	0	0	0	0	0	0	-0.0001
49	0.006	-0.0001	-0.0001	-0.0001	-0.0001	-0.0001	-0.0001	-0.0002	-0.0002	-0.0002	-0.0002	-0.0002	-0.0002	-0.0002	-0.0002	-0.0002	-0.0002	-0.0002	-0.0003	-0.0003	-0.0003
50	0.006	-0.0002	-0.0002	-0.0002	-0.0002	-0.0002	-0.0002	-0.0002	-0.0002	-0.0002	-0.0002	-0.0002	-0.0002	-0.0002	-0.0002	-0.0002	-0.0002	-0.0002	-0.0002	-0.0002	-0.0002
51	0.006	0	0	0	0	0	0	0	0	0	0.0001	0.0001	0.0001	0.0001	0.0001	0.0001	0.0001	0.0001	0.0002	0.0002	0.0002
52	0.006	0	0	0	0	0	0	0	0	0	0	0	0	0	0	0	0	0	0	0	0
53	0.006	-0.0002	-0.0002	-0.0002	-0.0002	-0.0002	-0.0002	-0.0002	-0.0002	-0.0002	-0.0002	-0.0002	-0.0002	-0.0002	-0.0003	-0.0003	-0.0003	-0.0003	-0.0003	-0.0003	-0.0003
54	0.0059	-0.0002	-0.0002	-0.0002	-0.0002	-0.0002	-0.0002	-0.0002	-0.0002	-0.0002	-0.0002	-0.0002	-0.0002	-0.0003	-0.0003	-0.0003	-0.0003	-0.0003	-0.0003	-0.0004	-0.0004
55	0.0058	0.0001	0.0001	0.0001	0.0001	0.0001	0.0001	0.0001	0.0001	0.0001	0.0001	0.0002	0.0002	0.0002	0.0002	0.0002	0.0002	0.0002	0.0003	0.0003	0.0004
56	0.0058	0.0001	0.0001	0.0001	0.0001	0.0001	0.0001	0.0001	0.0001	0.0001	0.0001	0.0001	0.0001	0.0001	0.0001	0.0001	0.0002	0.0002	0.0002	0.0002	0.0002
57	0.0058	-0.0002	-0.0002	-0.0002	-0.0002	-0.0002	-0.0002	-0.0002	-0.0002	-0.0002	-0.0002	-0.0002	-0.0002	-0.0002	-0.0002	-0.0003	-0.0003	-0.0003	-0.0003	-0.0003	-0.0004
58	0.0058	0	0	0	0	0	0	0	0	0	0	0	0	0	0	0	0	-0.0001	-0.0001	-0.0001	-0.0001
59	0.0058	-0.0002	-0.0002	-0.0002	-0.0002	-0.0002	-0.0002	-0.0002	-0.0003	-0.0003	-0.0003	-0.0003	-0.0003	-0.0004	-0.0004	-0.0004	-0.0004	-0.0004	-0.0005	-0.0006	-0.0006
60	0.0056	0	0	0	0	0	0	0	0	0	0	0	0	0	0	0.0001	0.0001	0.0001	0.0001	0.0001	0.0001
61	0.0056	0.0002	0.0002	0.0002	0.0002	0.0002	0.0002	0.0002	0.0002	0.0002	0.0002	0.0002	0.0002	0.0002	0.0002	0.0002	0.0002	0.0002	0.0002	0.0002	0.0002
62	0.0056	0	0	0	0	0	0	0	0	0	-0.0001	-0.0001	-0.0001	-0.0001	-0.0001	-0.0001	-0.0001	-0.0001	-0.0001	-0.0002	-0.0002
63	0.0056	-0.0001	-0.0001	-0.0001	-0.0001	-0.0001	-0.0001	-0.0001	-0.0001	-0.0001	-0.0001	-0.0001	-0.0001	-0.0001	-0.0001	-0.0001	-0.0001	-0.0001	-0.0001	-0.0001	-0.0001
64	0.0056	-0.0001	-0.0001	-0.0001	-0.0001	-0.0001	-0.0001	-0.0001	-0.0001	-0.0001	-0.0001	-0.0001	-0.0001	-0.0001	-0.0001	-0.0001	-0.0001	-0.0001	0	0	0
65	0.0056	0.0002	0.0002	0.0002	0.0002	0.0002	0.0002	0.0002	0.0002	0.0002	0.0002	0.0002	0.0003	0.0003	0.0003	0.0003	0.0003	0.0003	0.0003	0.0004	0.0004
66	0.0052	0.0001	0.0001	0.0001	0.0001	0.0001	0.0001	0.0001	0.0001	0.0001	0.0001	0.0001	0	0	0	0	0	0	-0.0001	-0.0001	-0.0002
67	0.0052	0.0001	0.0001	0.0001	0.0001	0.0001	0.0001	0.0001	0.0001	0.0001	0.0001	0.0001	0.0001	0.0001	0.0001	0.0002	0.0002	0.0002	0.0002	0.0002	0.0003
68	0.0052	-0.0002	-0.0002	-0.0002	-0.0002	-0.0002	-0.0002	-0.0002	-0.0002	-0.0002	-0.0002	-0.0002	-0.0002	-0.0002	-0.0002	-0.0002	-0.0002	-0.0002	-0.0002	-0.0002	-0.0002
69	0.0052	0.0001	0.0001	0.0001	0.0001	0.0001	0.0001	0.0001	0.0001	0.0001	0.0002	0.0002	0.0002	0.0002	0.0002	0.0002	0.0003	0.0003	0.0003	0.0004	0.0004
70	0.0052	-0.0002	-0.0002	-0.0002	-0.0002	-0.0002	-0.0002	-0.0002	-0.0002	-0.0002	-0.0002	-0.0002	-0.0002	-0.0002	-0.0002	-0.0002	-0.0002	-0.0002	-0.0002	-0.0002	-0.0002
71	0.0051	-0.0001	-0.0001	-0.0001	-0.0001	-0.0001	-0.0001	-0.0001	-0.0001	-0.0001	-0.0001	-0.0001	-0.0001	-0.0001	-0.0001	-0.0001	-0.0002	-0.0002	-0.0002	-0.0002	-0.0003
72	0.0051	0	0	0	0	0	0	0	0	0	0	0	-0.0001	-0.0001	-0.0001	-0.0001	-0.0001	-0.0001	-0.0001	-0.0002	-0.0002
73	0.0051	-0.0001	-0.0001	-0.0001	-0.0001	-0.0001	-0.0001	-0.0001	-0.0001	-0.0001	-0.0002	-0.0002	-0.0002	-0.0002	-0.0002	-0.0002	-0.0002	-0.0002	-0.0002	-0.0002	-0.0003
74	0.0051	-0.0003	-0.0003	-0.0003	-0.0003	-0.0003	-0.0003	-0.0003	-0.0004	-0.0004	-0.0004	-0.0004	-0.0004	-0.0004	-0.0005	-0.0005	-0.0005	-0.0005	-0.0005	-0.0006	-0.0006
75	0.0046	0.0001	0.0001	0.0001	0.0001	0.0001	0.0001	0.0001	0.0002	0.0002	0.0002	0.0002	0.0003	0.0003	0.0003	0.0003	0.0004	0.0004	0.0004	0.0005	0.0006
76	0.0046	0.0001	0.0001	0.0001	0.0001	0.0001	0.0001	0.0001	0.0001	0	0	0	0	0	0	0	-0.0001	-0.0001	-0.0001	-0.0001	-0.0002
77	0.0046	-0.0001	-0.0001	-0.0001	-0.0001	-0.0001	-0.0001	-0.0001	-0.0001	-0.0001	-0.0001	-0.0001	-0.0001	-0.0001	-0.0001	-0.0001	-0.0001	0	0	0	0
78	0.0045	0.0001	0.0001	0.0001	0.0001	0.0001	0.0001	0.0001	0.0001	0.0002	0.0002	0.0002	0.0002	0.0002	0.0002	0.0003	0.0003	0.0003	0.0003	0.0004	0.0004
79	0.0045	-0.0002	-0.0002	-0.0002	-0.0002	-0.0002	-0.0002	-0.0002	-0.0002	-0.0002	-0.0001	-0.0001	-0.0001	-0.0001	-0.0001	-0.0001	-0.0001	-0.0001	0	0	0.0001
80	0.0045	-0.0001	-0.0001	-0.0001	-0.0001	-0.0001	-0.0001	-0.0001	-0.0001	-0.0001	-0.0002	-0.0002	-0.0002	-0.0002	-0.0002	-0.0002	-0.0002	-0.0002	-0.0002	-0.0002	-0.0002
81	0.0045	0	0	0	0	0	0	0	0	0	0	0	0	0	0	0	0	0	-0.0001	-0.0001	-0.0001
82	0.0044	0	0	0	0	0	0	0	0	0.0001	0.0001	0.0001	0.0001	0.0001	0.0001	0.0001	0.0001	0.0001	0.0001	0.0001	0.0001
83	0.0039	-0.0009	-0.0009	-0.0009	-0.001	-0.001	-0.001	-0.001	-0.0009	-0.0009	-0.0009	-0.0009	-0.0009	-0.0009	-0.0009	-0.0009	-0.0009	-0.0009	-0.0009	-0.0009	-0.0008
84	0.0039	0.0002	0.0002	0.0002	0.0002	0.0002	0.0002	0.0002	0.0002	0.0001	0.0001	0.0001	0.0001	0.0001	0.0001	0.0001	0.0001	0.0001	0.0001	0.0001	0.0001
85	0.0039	0.0001	0.0001	0.0001	0.0001	0.0001	0.0001	0.0001	0.0001	0.0001	0.0001	0.0001	0.0001	0.0001	0.0001	0.0001	0.0001	0.0001	0.0001	0.0001	0.0001
86	0.0038	-0.0011	-0.0011	-0.0011	-0.0011	-0.0011	-0.0011	-0.0011	-0.0011	-0.0011	-0.0011	-0.0011	-0.0011	-0.0011	-0.0011	-0.0011	-0.0011	-0.0011	-0.001	-0.001	-0.001
87	0.0037	0	0	0	0	0	0	0	0	0	0	0	0	0	0	0	0	0	0	0	0
88	0.0037	-0.0001	-0.0001	-0.0001	-0.0001	-0.0001	-0.0001	-0.0001	-0.0001	-0.0001	-0.0001	-0.0001	-0.0001	-0.0001	-0.0001	-0.0001	-0.0001	-0.0001	-0.0001	-0.0001	-0.0001
89	0.0037	-0.0003	-0.0003	-0.0003	-0.0003	-0.0003	-0.0003	-0.0003	-0.0003	-0.0003	-0.0003	-0.0003	-0.0003	-0.0003	-0.0003	-0.0004	-0.0004	-0.0004	-0.0004	-0.0004	-0.0004
90	0.0036	0.0001	0.0001	0.0001	0.0001	0.0001	0.0001	0.0001	0.0001	0.0001	0.0002	0.0002	0.0002	0.0002	0.0002	0.0002	0.0002	0.0002	0.0002	0.0003	0.0003
91	0.0036	-0.0001	-0.0001	-0.0001	-0.0001	-0.0001	-0.0001	-0.0001	-0.0001	-0.0001	-0.0001	-0.0001	0	0	0	0	0	0	0	0	0
92	0.0036	-0.0001	-0.0001	-0.0001	-0.0001	-0.0001	-0.0001	-0.0001	-0.0001	-0.0001	0	0	0	0	0.0001	0.0001	0.0001	0.0001	0.0002	0.0003	0.0004
93	0.0036	0.0002	0.0002	0.0002	0.0002	0.0002	0.0002	0.0002	0.0003	0.0003	0.0004	0.0004	0.0005	0.0005	0.0006	0.0006	0.0006	0.0007	0.0008	0.0009	0.0011
94	0.0036	0.0003	0.0003	0.0003	0.0003	0.0003	0.0003	0.0003	0.0003	0.0003	0.0003	0.0003	0.0003	0.0003	0.0003	0.0004	0.0004	0.0004	0.0004	0.0004	0.0004
95	0.0035	0.0002	0.0002	0.0002	0.0002	0.0002	0.0002	0.0002	0.0002	0.0002	0.0002	0.0002	0.0002	0.0002	0.0002	0.0002	0.0002	0.0002	0.0002	0.0002	0.0002
96	0.0035	-0.0001	-0.0001	-0.0001	-0.0001	-0.0001	-0.0001	-0.0001	-0.0001	-0.0001	-0.0001	-0.0001	-0.0001	-0.0001	-0.0001	-0.0001	-0.0001	-0.0001	-0.0001	0	0
97	0.0035	0.0001	0.0001	0.0001	0.0001	0.0001	0.0001	0.0001	0.0001	0.0001	0.0001	0.0001	0.0001	0.0002	0.0002	0.0002	0.0002	0.0002	0.0002	0.0003	0.0003
98	0.0035	0.0001	0.0001	0.0001	0.0001	0.0001	0.0001	0.0001	0.0001	0.0001	0.0001	0.0001	0.0002	0.0002	0.0002	0.0002	0.0002	0.0002	0.0002	0.0002	0.0003
99	0.0033	-0.0001	-0.0001	-0.0001	-0.0001	-0.0001	-0.0001	-0.0001	-0.0001	-0.0001	-0.0001	-0.0001	-0.0001	-0.0001	-0.0001	-0.0001	-0.0001	-0.0001	-0.0001	-0.0001	-0.0001
100	0.0033	-0.0003	-0.0003	-0.0003	-0.0003	-0.0003	-0.0003	-0.0003	-0.0003	-0.0003	-0.0003	-0.0003	-0.0003	-0.0003	-0.0003	-0.0003	-0.0003	-0.0003	-0.0003	-0.0003	-0.0004
101	0.0033	0.0002	0.0002	0.0002	0.0002	0.0002	0.0002	0.0002	0.0002	0.0002	0.0002	0.0002	0.0002	0.0002	0.0002	0.0002	0.0002	0.0002	0.0002	0.0002	0.0002
102	0.0033	-0.0001	-0.0001	-0.0001	-0.0001	-0.0001	-0.0001	-0.0001	-0.0001	-0.0001	-0.0001	-0.0001	-0.0001	-0.0001	-0.0001	-0.0001	0	0	0	0	0
103	0.0033	-0.0002	-0.0002	-0.0002	-0.0002	-0.0002	-0.0002	-0.0002	-0.0002	-0.0002	-0.0002	-0.0002	-0.0002	-0.0002	-0.0002	-0.0002	-0.0002	-0.0002	-0.0002	-0.0002	-0.0002
104	0.0032	0.0004	0.0004	0.0004	0.0004	0.0004	0.0004	0.0005	0.0005	0.0005	0.0005	0.0005	0.0005	0.0005	0.0005	0.0005	0.0005	0.0005	0.0005	0.0005	0.0006
105	0.0032	-0.0002	-0.0002	-0.0002	-0.0002	-0.0002	-0.0002	-0.0002	-0.0002	-0.0003	-0.0003	-0.0003	-0.0003	-0.0003	-0.0003	-0.0003	-0.0003	-0.0003	-0.0003	-0.0003	-0.0003
106	0.0032	0.0002	0.0002	0.0002	0.0002	0.0002	0.0001	0.0001	0.0001	0.0001	0.0001	0.0001	0.0001	0.0001	0.0001	0.0001	0.0001	0.0001	0.0001	0.0001	0.0001
107	0.0032	-0.0002	-0.0002	-0.0002	-0.0002	-0.0002	-0.0002	-0.0002	-0.0002	-0.0002	-0.0002	-0.0002	-0.0002	-0.0002	-0.0002	-0.0002	-0.0002	-0.0002	-0.0002	-0.0002	-0.0002
108	0.0032	0.0002	0.0002	0.0002	0.0002	0.0002	0.0002	0.0002	0.0002	0.0002	0.0002	0.0002	0.0002	0.0002	0.0002	0.0003	0.0003	0.0003	0.0003	0.0003	0.0003
109	0.0032	-0.0002	-0.0002	-0.0002	-0.0002	-0.0002	-0.0002	-0.0002	-0.0002	-0.0002	-0.0002	-0.0002	-0.0002	-0.0002	-0.0003	-0.0003	-0.0003	-0.0003	-0.0003	-0.0003	-0.0003
110	0.0032	0.0001	0.0001	0.0001	0.0001	0.0001	0.0001	0.0001	0.0001	0.0001	0.0001	0.0001	0.0001	0.0001	0	0	0	0	0	0	0
111	0.0032	0.0001	0.0001	0.0001	0.0001	0.0001	0.0001	0.0001	0.0001	0.0001	0.0001	0.0001	0.0001	0.0001	0.0001	0.0001	0.0001	0.0001	0.0001	0.0001	0.0001
112	0.0032	0.0003	0.0003	0.0003	0.0003	0.0003	0.0003	0.0003	0.0004	0.0004	0.0004	0.0004	0.0004	0.0005	0.0005	0.0005	0.0005	0.0005	0.0005	0.0006	0.0006
113	0.0032	0.0002	0.0002	0.0002	0.0002	0.0002	0.0002	0.0002	0.0002	0.0002	0.0002	0.0002	0.0002	0.0002	0.0002	0.0002	0.0002	0.0002	0.0002	0.0002	0.0002
114	0.0032	0.0004	0.0004	0.0004	0.0004	0.0004	0.0004	0.0004	0.0005	0.0005	0.0005	0.0005	0.0005	0.0006	0.0006	0.0006	0.0006	0.0006	0.0007	0.0008	0.0008
115	0.0031	0	0	0	0	0	-0.0001	-0.0001	-0.0001	-0.0001	-0.0001	-0.0001	-0.0001	-0.0001	-0.0001	-0.0001	-0.0001	-0.0001	-0.0001	-0.0001	-0.0002
116	0.0031	-0.0003	-0.0003	-0.0003	-0.0003	-0.0003	-0.0003	-0.0003	-0.0003	-0.0003	-0.0003	-0.0003	-0.0003	-0.0003	-0.0003	-0.0003	-0.0003	-0.0003	-0.0002	-0.0002	-0.0002
117	0.0031	-0.0005	-0.0005	-0.0005	-0.0005	-0.0005	-0.0005	-0.0005	-0.0005	-0.0005	-0.0005	-0.0005	-0.0005	-0.0005	-0.0005	-0.0005	-0.0005	-0.0005	-0.0005	-0.0005	-0.0005
118	0.0031	0.0004	0.0004	0.0004	0.0004	0.0004	0.0004	0.0004	0.0004	0.0004	0.0004	0.0004	0.0004	0.0004	0.0004	0.0004	0.0004	0.0004	0.0004	0.0004	0.0004
119	0.0031	0.0004	0.0004	0.0004	0.0004	0.0004	0.0004	0.0003	0.0003	0.0004	0.0004	0.0004	0.0004	0.0004	0.0004	0.0004	0.0004	0.0004	0.0004	0.0004	0.0004
120	0.0029	0.0011	0.0011	0.0011	0.0011	0.0011	0.0011	0.0011	0.0011	0.0011	0.0011	0.0012	0.0012	0.0012	0.0012	0.0012	0.0012	0.0012	0.0012	0.0012	0.0013
121	0.0027	-0.0002	-0.0002	-0.0002	-0.0002	-0.0002	-0.0002	-0.0002	-0.0002	-0.0002	-0.0002	-0.0003	-0.0003	-0.0003	-0.0003	-0.0003	-0.0003	-0.0003	-0.0003	-0.0004	-0.0004
122	0.0027	0.0002	0.0002	0.0002	0.0002	0.0002	0.0002	0.0002	0.0002	0.0002	0.0001	0.0001	0.0001	0.0001	0	0	0	0	-0.0001	-0.0002	-0.0003
123	0.0027	0.001	0.001	0.001	0.001	0.001	0.001	0.001	0.0009	0.0009	0.0008	0.0008	0.0007	0.0006	0.0006	0.0005	0.0005	0.0004	0.0003	0.0001	0
124	0.0027	0.0003	0.0003	0.0003	0.0003	0.0003	0.0003	0.0003	0.0003	0.0003	0.0003	0.0003	0.0003	0.0003	0.0003	0.0003	0.0003	0.0003	0.0003	0.0003	0.0003
125	0.0027	-0.0003	-0.0003	-0.0003	-0.0003	-0.0003	-0.0003	-0.0004	-0.0004	-0.0004	-0.0004	-0.0004	-0.0004	-0.0004	-0.0004	-0.0004	-0.0004	-0.0004	-0.0005	-0.0005	-0.0005
126	0.0027	-0.0001	-0.0001	-0.0001	-0.0001	-0.0001	-0.0001	-0.0001	-0.0001	-0.0001	-0.0001	-0.0001	-0.0001	0	0	0	0	0	0	0	0
127	0.0026	0.0009	0.0009	0.0009	0.0009	0.0009	0.0009	0.0009	0.0009	0.0008	0.0008	0.0008	0.0008	0.0008	0.0008	0.0008	0.0007	0.0007	0.0007	0.0007	0.0006
128	0.0026	0.0001	0.0001	0.0001	0.0001	0.0001	0.0001	0.0001	0.0001	0.0001	0.0001	0.0001	0.0001	0.0001	0.0001	0.0001	0.0001	0.0001	0.0001	0.0001	0.0001
129	0.0026	0	0	0	0	0	0	0	0	0	0.0001	0.0001	0.0001	0.0001	0.0002	0.0002	0.0002	0.0002	0.0003	0.0004	0.0004
130	0.0026	0.0005	0.0005	0.0005	0.0005	0.0005	0.0005	0.0005	0.0005	0.0005	0.0005	0.0005	0.0005	0.0005	0.0005	0.0005	0.0005	0.0005	0.0006	0.0006	0.0006
131	0.0026	-0.0008	-0.0008	-0.0008	-0.0008	-0.0008	-0.0008	-0.0008	-0.0008	-0.0008	-0.0007	-0.0007	-0.0007	-0.0007	-0.0007	-0.0007	-0.0007	-0.0007	-0.0006	-0.0006	-0.0006
132	0.0026	0.001	0.001	0.001	0.001	0.001	0.001	0.001	0.001	0.0011	0.0011	0.0011	0.0011	0.0012	0.0012	0.0012	0.0012	0.0012	0.0013	0.0013	0.0014
133	0.0026	0.0005	0.0005	0.0005	0.0005	0.0005	0.0005	0.0005	0.0005	0.0005	0.0005	0.0005	0.0004	0.0004	0.0004	0.0004	0.0004	0.0004	0.0004	0.0004	0.0004
134	0.0026	0.0016	0.0016	0.0016	0.0016	0.0016	0.0016	0.0016	0.0016	0.0016	0.0016	0.0016	0.0015	0.0015	0.0015	0.0015	0.0015	0.0015	0.0015	0.0015	0.0015
135	0.0026	0.001	0.001	0.001	0.001	0.001	0.001	0.001	0.001	0.0009	0.0009	0.0009	0.0009	0.0009	0.0009	0.0009	0.0009	0.0009	0.0009	0.0009	0.0009
136	0.0026	0.0001	0.0001	0.0001	0.0001	0.0001	0.0001	0.0001	0.0001	0.0001	0.0001	0.0001	0.0001	0.0001	0.0001	0.0001	0.0001	0.0001	0.0001	0.0001	0
137	0.0025	0.0015	0.0015	0.0015	0.0015	0.0015	0.0015	0.0015	0.0015	0.0015	0.0015	0.0015	0.0015	0.0015	0.0015	0.0015	0.0015	0.0015	0.0015	0.0014	0.0014
138	0.0025	-0.0004	-0.0004	-0.0004	-0.0004	-0.0004	-0.0004	-0.0004	-0.0004	-0.0004	-0.0004	-0.0004	-0.0004	-0.0004	-0.0004	-0.0005	-0.0005	-0.0005	-0.0005	-0.0005	-0.0005
139	0.0025	-0.0006	-0.0006	-0.0006	-0.0006	-0.0006	-0.0006	-0.0006	-0.0006	-0.0006	-0.0006	-0.0006	-0.0006	-0.0006	-0.0006	-0.0006	-0.0006	-0.0006	-0.0006	-0.0006	-0.0006
140	0.0025	0	0	0	0	0.0001	0.0001	0.0001	0.0001	0.0001	0.0001	0.0001	0.0001	0.0001	0.0001	0.0002	0.0002	0.0002	0.0002	0.0002	0.0003
141	0.0025	0.0036	0.0036	0.0036	0.0036	0.0036	0.0036	0.0036	0.0036	0.0036	0.0036	0.0036	0.0035	0.0035	0.0035	0.0035	0.0035	0.0035	0.0035	0.0035	0.0035
142	0.0025	0.0033	0.0033	0.0033	0.0033	0.0033	0.0033	0.0033	0.0033	0.0033	0.0033	0.0033	0.0032	0.0032	0.0032	0.0032	0.0032	0.0032	0.0032	0.0031	0.0031
143	0.0024	0.0011	0.0011	0.0011	0.0011	0.0011	0.001	0.001	0.001	0.0009	0.0008	0.0008	0.0008	0.0007	0.0007	0.0006	0.0006	0.0006	0.0005	0.0004	0.0002
144	0.0024	-0.0003	-0.0003	-0.0003	-0.0003	-0.0003	-0.0003	-0.0003	-0.0003	-0.0002	-0.0002	-0.0002	-0.0002	-0.0002	-0.0002	-0.0002	-0.0002	-0.0002	-0.0002	-0.0002	-0.0002
145	0.0024	0.0013	0.0013	0.0013	0.0013	0.0013	0.0013	0.0012	0.0012	0.0012	0.0012	0.0012	0.0012	0.0012	0.0012	0.0012	0.0011	0.0011	0.0011	0.0011	0.0011
146	0.0024	-0.0005	-0.0005	-0.0005	-0.0005	-0.0005	-0.0005	-0.0005	-0.0005	-0.0005	-0.0005	-0.0005	-0.0005	-0.0005	-0.0005	-0.0005	-0.0005	-0.0005	-0.0005	-0.0005	-0.0006
147	0.0024	0.0026	0.0026	0.0026	0.0026	0.0026	0.0026	0.0026	0.0026	0.0026	0.0026	0.0026	0.0026	0.0026	0.0026	0.0026	0.0026	0.0026	0.0027	0.0027	0.0027
148	0.0023	0.5182	0.5183	0.5185	0.5186	0.5187	0.5186	0.5184	0.5179	0.5175	0.5163	0.5161	0.5158	0.5156	0.5156	0.5157	0.5159	0.5161	0.5177	0.5212	0.5264
149	0.0023	-0.0106	-0.0106	-0.0106	-0.0106	-0.0106	-0.0106	-0.0106	-0.0106	-0.0106	-0.0106	-0.0106	-0.0106	-0.0106	-0.0106	-0.0106	-0.0106	-0.0106	-0.0107	-0.0108	-0.0109
150	0.0022	0.0036	0.0036	0.0036	0.0036	0.0036	0.0036	0.0036	0.0036	0.0036	0.0036	0.0036	0.0037	0.0037	0.0037	0.0037	0.0037	0.0037	0.0037	0.0038	0.0039
151	0.0022	0.0018	0.0018	0.0018	0.0018	0.0018	0.0018	0.0018	0.0018	0.0018	0.0019	0.0019	0.0019	0.0019	0.002	0.002	0.002	0.002	0.0021	0.0022	0.0023
152	0.0022	0.0095	0.0095	0.0095	0.0095	0.0095	0.0095	0.0095	0.0095	0.0095	0.0095	0.0095	0.0095	0.0095	0.0095	0.0096	0.0096	0.0096	0.0096	0.0097	0.0099
153	0.002	0.0008	0.0008	0.0008	0.0008	0.0008	0.0008	0.0008	0.0008	0.0008	0.0008	0.0008	0.0008	0.0009	0.0009	0.0009	0.0009	0.0009	0.0009	0.0009	0.0009
154	0.002	0.0007	0.0007	0.0007	0.0007	0.0007	0.0007	0.0007	0.0007	0.0007	0.0007	0.0007	0.0007	0.0007	0.0007	0.0007	0.0006	0.0006	0.0006	0.0006	0.0006
155	0.002	0.0003	0.0003	0.0003	0.0003	0.0003	0.0003	0.0003	0.0003	0.0004	0.0004	0.0004	0.0005	0.0005	0.0005	0.0005	0.0006	0.0006	0.0006	0.0007	0.0008
156	0.002	-0.0006	-0.0006	-0.0006	-0.0006	-0.0006	-0.0006	-0.0006	-0.0007	-0.0007	-0.0008	-0.0008	-0.0008	-0.0009	-0.0009	-0.0009	-0.001	-0.001	-0.0011	-0.0012	-0.0013
157	0.002	-0.0019	-0.0019	-0.0019	-0.0019	-0.002	-0.002	-0.002	-0.002	-0.002	-0.0021	-0.0021	-0.0021	-0.0021	-0.0022	-0.0022	-0.0022	-0.0022	-0.0023	-0.0024	-0.0025
158	0.0019	0.0014	0.0014	0.0014	0.0014	0.0014	0.0014	0.0014	0.0014	0.0014	0.0013	0.0013	0.0013	0.0013	0.0013	0.0013	0.0013	0.0013	0.0013	0.0013	0.0013
159	0.0019	0.0003	0.0003	0.0003	0.0003	0.0003	0.0003	0.0003	0.0003	0.0003	0.0003	0.0003	0.0003	0.0003	0.0003	0.0003	0.0003	0.0003	0.0004	0.0004	0.0004
160	0.0019	-0.0004	-0.0004	-0.0004	-0.0004	-0.0004	-0.0004	-0.0004	-0.0004	-0.0004	-0.0004	-0.0004	-0.0004	-0.0004	-0.0004	-0.0004	-0.0004	-0.0004	-0.0005	-0.0005	-0.0005
161	0.0019	0	0	0	0	0	0	0	-0.0001	-0.0001	-0.0001	-0.0001	-0.0001	-0.0001	-0.0001	-0.0001	-0.0001	-0.0001	-0.0002	-0.0002	-0.0002
162	0.0019	-0.0001	-0.0001	-0.0001	-0.0001	-0.0001	-0.0001	-0.0001	-0.0001	-0.0001	-0.0001	-0.0001	-0.0001	-0.0001	-0.0001	-0.0002	-0.0002	-0.0002	-0.0002	-0.0002	-0.0002
163	0.0017	-0.0005	-0.0005	-0.0005	-0.0005	-0.0005	-0.0005	-0.0005	-0.0006	-0.0006	-0.0006	-0.0006	-0.0006	-0.0006	-0.0006	-0.0006	-0.0006	-0.0006	-0.0007	-0.0007	-0.0007
164	0.0016	0	0	0	0	0	0	0	0	0	0.0001	0.0001	0.0001	0.0001	0.0001	0.0001	0.0001	0.0001	0.0001	0.0002	0.0002
165	0.0016	0.0005	0.0005	0.0005	0.0005	0.0005	0.0005	0.0005	0.0005	0.0006	0.0007	0.0007	0.0007	0.0008	0.0008	0.0009	0.0009	0.001	0.0011	0.0012	0.0014
166	0.0016	0.0009	0.0009	0.0009	0.0009	0.0009	0.0009	0.0009	0.0009	0.0009	0.001	0.001	0.001	0.001	0.0011	0.0011	0.0011	0.0012	0.0013	0.0014	0.0015
167	0.0016	-0.0002	-0.0002	-0.0002	-0.0002	-0.0002	-0.0002	-0.0002	-0.0002	-0.0003	-0.0003	-0.0003	-0.0003	-0.0003	-0.0003	-0.0004	-0.0004	-0.0004	-0.0004	-0.0005	-0.0006
168	0.0016	-0.0011	-0.0011	-0.0011	-0.0011	-0.0012	-0.0012	-0.0012	-0.0013	-0.0014	-0.0015	-0.0016	-0.0017	-0.0017	-0.0018	-0.0019	-0.002	-0.002	-0.0022	-0.0025	-0.0027
169	0.0016	-0.0009	-0.0009	-0.0009	-0.0009	-0.0009	-0.0009	-0.001	-0.001	-0.001	-0.0011	-0.0011	-0.0011	-0.0012	-0.0012	-0.0013	-0.0013	-0.0013	-0.0014	-0.0015	-0.0017
170	0.0012	0.0003	0.0003	0.0003	0.0003	0.0003	0.0003	0.0003	0.0003	0.0003	0.0003	0.0003	0.0003	0.0003	0.0003	0.0003	0.0003	0.0003	0.0004	0.0004	0.0004
171	0.0012	-0.0013	-0.0013	-0.0013	-0.0013	-0.0013	-0.0013	-0.0013	-0.0014	-0.0014	-0.0015	-0.0015	-0.0016	-0.0016	-0.0017	-0.0018	-0.0018	-0.0018	-0.0019	-0.0021	-0.0023
172	0.0012	0.0005	0.0005	0.0005	0.0005	0.0005	0.0005	0.0005	0.0006	0.0006	0.0008	0.0008	0.0009	0.0009	0.001	0.0011	0.0011	0.0012	0.0013	0.0015	0.0017
173	0.0012	-0.0009	-0.0009	-0.0009	-0.0009	-0.0009	-0.0009	-0.0009	-0.001	-0.001	-0.0011	-0.0012	-0.0012	-0.0013	-0.0014	-0.0014	-0.0015	-0.0015	-0.0017	-0.0019	-0.0021
174	0.0012	-0.0012	-0.0012	-0.0012	-0.0012	-0.0012	-0.0012	-0.0012	-0.0012	-0.0013	-0.0014	-0.0014	-0.0015	-0.0016	-0.0017	-0.0017	-0.0018	-0.0018	-0.002	-0.0022	-0.0025

## Sheet: 13C_shielding_contributions
Normal mode contributions to shielding.
For one 13C in C60. Calculated at PBE0/pcSseg-1 level. Units: ppm.
freq (1/cm)	Mode \ T (K)	0	50	100	150	200	260	280	300	320	340	400
1627.52	1	-0.0247977	-0.0247977	-0.0247979	-0.0247977	-0.0247975	-0.024802	-0.0248072	-0.0248154	-0.0248278	-0.0248453	-0.0249369
1627.48	2	0.00515733	0.00515736	0.0051574	0.00515737	0.00515729	0.00515825	0.00515933	0.00516103	0.00516361	0.00516726	0.00518632
1627.3	3	0.0319498	0.03195	0.0319502	0.0319498	0.0319495	0.0319554	0.0319619	0.0319727	0.0319887	0.0320112	0.0321292
1627.1	4	0.0583033	0.0583037	0.0583037	0.0583033	0.0583028	0.0583137	0.0583259	0.0583455	0.0583748	0.0584162	0.0586323
1625.14	5	-0.0174528	-0.0174528	-0.0174529	-0.0174528	-0.0174527	-0.0174561	-0.0174597	-0.0174656	-0.0174745	-0.0174869	-0.0175521
1619.41	6	-0.00657497	-0.00657501	-0.00657501	-0.00657497	-0.00657492	-0.00657621	-0.0065776	-0.00657989	-0.00658329	-0.0065881	-0.00661305
1619.29	7	0.00907273	0.00907279	0.00907279	0.00907273	0.00907266	0.00907438	0.00907636	0.00907952	0.00908421	0.00909079	0.00912527
1619.35	8	0.0121711	0.0121712	0.0121713	0.0121712	0.0121711	0.0121735	0.0121761	0.0121803	0.0121866	0.0121955	0.0122418
1618.93	9	-0.00794128	-0.00794133	-0.00794138	-0.00794133	-0.00794127	-0.00794283	-0.00794456	-0.00794733	-0.00795145	-0.00795726	-0.00798754
1614.4	10	-0.0271182	-0.0271184	-0.0271185	-0.0271184	-0.0271184	-0.0271242	-0.0271302	-0.0271401	-0.0271546	-0.0271749	-0.0272802
1572.82	11	-0.0142885	-0.0142885	-0.0142885	-0.0142885	-0.0142884	-0.014292	-0.0142959	-0.014302	-0.0143108	-0.0143232	-0.0143862
1572.79	12	-0.00381705	-0.00381705	-0.00381707	-0.00381705	-0.00381702	-0.003818	-0.00381904	-0.00382065	-0.00382302	-0.00382632	-0.00384315
1569.92	13	-0.0239615	-0.0239616	-0.0239618	-0.0239617	-0.0239616	-0.023968	-0.0239745	-0.0239849	-0.0240001	-0.024021	-0.0241278
1548.42	14	-0.00653259	-0.00653259	-0.00653263	-0.00653259	-0.00653261	-0.0065346	-0.00653661	-0.00653973	-0.00654429	-0.00655048	-0.00658183
1548.79	15	-0.0114677	-0.0114678	-0.0114678	-0.0114677	-0.0114678	-0.0114713	-0.0114748	-0.0114803	-0.0114882	-0.0114991	-0.011554
1547.95	16	-0.0291238	-0.0291238	-0.029124	-0.0291239	-0.0291239	-0.0291329	-0.0291418	-0.0291558	-0.0291759	-0.0292038	-0.0293435
1545.78	17	-0.0245555	-0.0245555	-0.0245557	-0.0245555	-0.0245558	-0.0245637	-0.0245714	-0.0245834	-0.0246007	-0.0246244	-0.0247434
1511.41	18	0.0180841	0.0180844	0.0180844	0.0180843	0.0180843	0.0180912	0.0180978	0.0181079	0.0181226	0.0181424	0.0182405
1476.71	19	-0.00135769	-0.0013577	-0.00135771	-0.0013577	-0.00135773	-0.00135837	-0.00135897	-0.00135986	-0.00136112	-0.00136282	-0.00137106
1477.7	20	-0.00799504	-0.00799509	-0.00799509	-0.00799505	-0.00799526	-0.00799905	-0.0080025	-0.00800777	-0.00801518	-0.00802516	-0.00807349
1477.09	21	-0.0172083	-0.0172084	-0.0172086	-0.0172085	-0.0172088	-0.017217	-0.0172245	-0.0172358	-0.0172519	-0.0172733	-0.0173776
1476.14	22	-0.0171196	-0.0171198	-0.0171198	-0.0171197	-0.0171201	-0.0171283	-0.0171358	-0.0171471	-0.0171631	-0.0171846	-0.0172886
1468.75	23	-0.00202829	-0.00202831	-0.00202832	-0.00202831	-0.00202834	-0.00202931	-0.00203022	-0.00203158	-0.00203352	-0.00203612	-0.0020487
1468.78	24	0.000963997	0.000964004	0.000964011	0.000964005	0.000964021	0.000964487	0.000964916	0.000965568	0.000966487	0.000967723	0.000973703
1467.46	25	0.00680037	0.00680041	0.00680046	0.00680038	0.00680053	0.00680385	0.00680694	0.00681157	0.00681808	0.00682685	0.00686926
1464.6	26	0.025236	0.0252362	0.0252362	0.025236	0.0252367	0.0252492	0.0252608	0.0252782	0.0253028	0.0253357	0.0254943
1465.22	27	-0.0100267	-0.0100268	-0.0100269	-0.0100268	-0.010027	-0.010032	-0.0100365	-0.0100434	-0.0100531	-0.0100662	-0.0101291
1465.05	28	0.0070667	0.00706674	0.00706679	0.00706671	0.00706688	0.00707042	0.00707362	0.00707848	0.00708536	0.00709455	0.00713892
1464.88	29	0.0136711	0.0136712	0.0136713	0.0136711	0.0136714	0.0136783	0.0136846	0.013694	0.0137072	0.013725	0.013811
1458.4	30	0.129	0.129001	0.129002	0.129001	0.129006	0.129077	0.12914	0.129233	0.129363	0.129537	0.130371
1386.47	31	0.00824334	0.00824334	0.0082434	0.00824337	0.00824399	0.00825084	0.00825645	0.00826454	0.00827564	0.00829016	0.00835733
1386.67	32	-0.0204706	-0.0204707	-0.0204709	-0.0204708	-0.0204724	-0.0204892	-0.0205031	-0.0205233	-0.0205509	-0.0205869	-0.0207534
1386.37	33	-0.00411788	-0.00411788	-0.00411791	-0.0041179	-0.00411824	-0.00412163	-0.00412443	-0.00412847	-0.00413402	-0.00414127	-0.00417484
1384.26	34	0.000450057	0.00045006	0.000450064	0.000450062	0.0004501	0.000450475	0.000450784	0.000451233	0.000451845	0.000452644	0.000456333
1383.93	35	-0.000360132	-0.000360132	-0.000360134	-0.000360133	-0.000360163	-0.000360464	-0.000360712	-0.000361069	-0.000361558	-0.000362198	-0.000365156
1384.05	36	-0.00166137	-0.00166137	-0.00166138	-0.00166138	-0.00166152	-0.0016629	-0.00166405	-0.00166569	-0.00166796	-0.0016709	-0.00168453
1382.93	37	-0.0258499	-0.0258501	-0.0258501	-0.0258502	-0.0258522	-0.0258741	-0.025892	-0.0259177	-0.0259532	-0.0259991	-0.0262119
1380.94	38	-0.0253048	-0.025305	-0.025305	-0.0253051	-0.0253071	-0.0253287	-0.0253464	-0.025372	-0.0254068	-0.0254523	-0.0256624
1346.06	39	-0.0117474	-0.0117475	-0.0117475	-0.0117476	-0.0117487	-0.0117606	-0.0117701	-0.0117838	-0.0118023	-0.0118261	-0.0119345
1346.05	40	-0.0156522	-0.0156523	-0.0156523	-0.0156522	-0.0156539	-0.0156697	-0.0156824	-0.0157005	-0.0157251	-0.0157569	-0.0159011
1345.09	41	-0.00643376	-0.0064338	-0.00643385	-0.00643384	-0.00643447	-0.00644105	-0.00644629	-0.00645376	-0.00646389	-0.006477	-0.00653652
1345.06	42	-0.00530544	-0.00530548	-0.00530548	-0.00530551	-0.00530603	-0.00531142	-0.00531574	-0.00532194	-0.00533029	-0.00534106	-0.00539014
1341.62	43	-0.0172573	-0.0172575	-0.0172575	-0.0172574	-0.0172593	-0.0172773	-0.0172916	-0.0173121	-0.0173396	-0.0173751	-0.0175361
1341.44	44	-0.016829	-0.016829	-0.0168291	-0.0168291	-0.0168309	-0.0168485	-0.0168625	-0.0168824	-0.0169092	-0.0169439	-0.0171011
1339.85	45	0.0042524	0.0042524	0.00425243	0.00425243	0.00425289	0.0042574	0.00426095	0.00426603	0.00427287	0.00428167	0.0043216
1339.45	46	-0.0103847	-0.0103848	-0.0103848	-0.0103848	-0.010386	-0.010397	-0.0104056	-0.0104181	-0.0104348	-0.0104564	-0.010554
1313.42	47	-0.0100041	-0.0100042	-0.0100042	-0.0100042	-0.0100056	-0.0100179	-0.0100274	-0.0100408	-0.0100587	-0.0100816	-0.010184
1312.58	48	-0.0231967	-0.0231969	-0.0231969	-0.023197	-0.0232002	-0.0232289	-0.023251	-0.0232821	-0.0233237	-0.023377	-0.0236153
1312.28	49	-0.0109881	-0.0109882	-0.0109882	-0.0109883	-0.0109899	-0.0110034	-0.0110139	-0.0110288	-0.0110485	-0.0110737	-0.0111867
1291.23	50	-0.00988651	-0.00988658	-0.00988666	-0.00988667	-0.00988826	-0.00990173	-0.00991211	-0.0099266	-0.00994585	-0.00997042	-0.0100789
1290.88	51	-0.0154787	-0.0154788	-0.0154788	-0.015479	-0.0154814	-0.0155026	-0.0155189	-0.0155416	-0.0155717	-0.0156102	-0.0157804
1291.38	52	0.000350856	0.000350858	0.000350858	0.000350861	0.000350915	0.000351395	0.000351764	0.000352278	0.00035296	0.000353831	0.000357678
1290.18	53	-0.00287091	-0.00287094	-0.00287094	-0.00287096	-0.00287143	-0.00287538	-0.00287841	-0.00288264	-0.00288826	-0.00289542	-0.00292707
1288.38	54	-0.00669057	-0.00669062	-0.00669068	-0.00669068	-0.00669178	-0.0067011	-0.00670823	-0.00671816	-0.00673136	-0.0067481	-0.00682223
1253.52	55	-0.0189492	-0.0189493	-0.0189493	-0.0189495	-0.0189536	-0.0189855	-0.019009	-0.0190416	-0.0190843	-0.0191379	-0.0193717
1254.52	56	0.00245592	0.00245594	0.00245594	0.00245597	0.00245649	0.00246061	0.00246364	0.00246784	0.00247336	0.00248028	0.00251047
1254.67	57	-0.00635573	-0.00635573	-0.00635579	-0.00635581	-0.00635716	-0.00636781	-0.00637565	-0.00638651	-0.00640073	-0.00641868	-0.00649674
1253.75	58	-0.00772463	-0.00772463	-0.00772469	-0.00772472	-0.00772644	-0.00773938	-0.00774901	-0.00776226	-0.00777966	-0.00780155	-0.00789682
1253	59	-0.0256828	-0.0256828	-0.025683	-0.0256831	-0.0256889	-0.0257323	-0.0257645	-0.0258087	-0.0258665	-0.0259395	-0.0262569
1225.94	60	-0.0153285	-0.0153285	-0.0153286	-0.0153287	-0.0153328	-0.0153629	-0.0153845	-0.0154141	-0.0154525	-0.0155006	-0.0157073
1225.54	61	-0.0110911	-0.0110912	-0.0110913	-0.0110914	-0.0110943	-0.0111161	-0.0111318	-0.0111533	-0.0111811	-0.0112159	-0.0113654
1225.18	62	-0.0195909	-0.019591	-0.019591	-0.0195913	-0.0195965	-0.0196351	-0.019663	-0.019701	-0.0197503	-0.019812	-0.0200766
1212.79	63	-0.00942385	-0.00942392	-0.00942392	-0.00942409	-0.00942675	-0.00944642	-0.00946057	-0.00947975	-0.00950461	-0.00953561	-0.00966784
1211.91	64	-0.0125618	-0.0125619	-0.012562	-0.0125621	-0.0125657	-0.012592	-0.012611	-0.0126366	-0.0126699	-0.0127113	-0.0128881
1210.98	65	0.028108	0.0281082	0.0281085	0.0281087	0.0281173	0.0281767	0.0282193	0.0282769	0.0283518	0.0284448	0.0288422
1133.05	66	-0.0260324	-0.0260324	-0.0260324	-0.0260334	-0.0260472	-0.0261304	-0.026186	-0.0262599	-0.0263528	-0.0264661	-0.0269333
1134.32	67	-0.0129717	-0.0129717	-0.0129718	-0.0129722	-0.012979	-0.0130202	-0.0130479	-0.0130844	-0.0131305	-0.0131868	-0.0134184
1134.27	68	-0.00701041	-0.00701041	-0.00701047	-0.00701067	-0.00701436	-0.00703663	-0.00705161	-0.00707134	-0.00709631	-0.00712672	-0.00725191
1133.07	69	-0.0224931	-0.0224931	-0.0224933	-0.0224939	-0.0225058	-0.0225777	-0.022626	-0.0226896	-0.02277	-0.022868	-0.0232716
1132.23	70	-0.0136759	-0.013676	-0.013676	-0.0136764	-0.0136837	-0.0137276	-0.0137571	-0.0137959	-0.013845	-0.0139047	-0.0141504
1104.52	71	-0.0189621	-0.0189622	-0.0189623	-0.0189632	-0.0189752	-0.0190454	-0.0190916	-0.0191519	-0.0192273	-0.0193188	-0.0196907
1104.52	72	-0.0175674	-0.0175675	-0.0175677	-0.0175684	-0.0175796	-0.0176447	-0.0176874	-0.0177432	-0.0178132	-0.0178978	-0.0182424
1104.63	73	-0.0164992	-0.0164993	-0.0164993	-0.0165001	-0.0165105	-0.0165716	-0.0166119	-0.0166643	-0.0167299	-0.0168094	-0.0171326
1101.79	74	0.02051	0.0205102	0.0205102	0.0205113	0.0205247	0.020602	0.0206526	0.0207186	0.0208012	0.0209012	0.0213067
987.42	75	-0.0172761	-0.0172761	-0.0172761	-0.0172788	-0.0173042	-0.0174224	-0.017493	-0.0175814	-0.017688	-0.017813	-0.0182964
989.62	76	-0.00992369	-0.00992369	-0.0099238	-0.00992519	-0.00993957	-0.0100067	-0.0100468	-0.0100971	-0.0101578	-0.0102292	-0.0105049
989.53	77	-0.0104283	-0.0104283	-0.0104284	-0.0104298	-0.0104449	-0.0105155	-0.0105577	-0.0106105	-0.0106743	-0.0107493	-0.011039
988.08	78	-0.0171958	-0.0171958	-0.017196	-0.0171984	-0.0172238	-0.017341	-0.0174109	-0.0174986	-0.0176045	-0.0177289	-0.0182088
983.39	79	-0.00981378	-0.00981378	-0.0098139	-0.00981535	-0.0098303	-0.00989883	-0.00993964	-0.00999064	-0.0100522	-0.0101243	-0.010403
982.66	80	-0.0267428	-0.0267431	-0.0267431	-0.0267474	-0.0267881	-0.0269757	-0.0270874	-0.0272268	-0.0273952	-0.0275923	-0.0283524
983.35	81	-0.00127861	-0.00127862	-0.00127862	-0.00127883	-0.00128076	-0.0012897	-0.00129502	-0.00130166	-0.00130969	-0.00131912	-0.00135539
968.61	82	-0.00950745	-0.00950755	-0.00950757	-0.00950931	-0.00952538	-0.00959729	-0.00963949	-0.00969194	-0.00975499	-0.00982846	-0.0101097
750.97	83	-0.124891	-0.124891	-0.124896	-0.125077	-0.126019	-0.128863	-0.130265	-0.131888	-0.133719	-0.135742	-0.142849
844.68	84	-0.0155825	-0.0155825	-0.0155826	-0.0155919	-0.0156542	-0.0158759	-0.0159938	-0.0161343	-0.0162969	-0.016481	-0.0171509
844.66	85	-0.0116134	-0.0116134	-0.0116135	-0.0116204	-0.0116668	-0.0118321	-0.0119199	-0.0120246	-0.0121459	-0.012283	-0.0127833
779.8	86	-0.0841333	-0.0841333	-0.0841356	-0.0842283	-0.0847507	-0.0864114	-0.0872494	-0.0882272	-0.0893376	-0.0905759	-0.0949693
803.07	87	-0.00631898	-0.00631898	-0.0063191	-0.00632469	-0.00635825	-0.00646916	-0.00652621	-0.00659329	-0.00667012	-0.00675609	-0.007064
803.08	88	-0.0122993	-0.0122993	-0.0122995	-0.0123104	-0.0123757	-0.0125916	-0.0127027	-0.0128334	-0.0129828	-0.0131501	-0.0137494
801.81	89	-0.0121493	-0.0121493	-0.0121495	-0.0121604	-0.0122255	-0.0124401	-0.0125504	-0.0126801	-0.0128285	-0.0129945	-0.0135889
792.68	90	-0.00995996	-0.00995996	-0.00996018	-0.00996989	-0.0100264	-0.0102105	-0.0103043	-0.0104144	-0.0105399	-0.0106804	-0.0111811
793.18	91	-0.0121815	-0.0121815	-0.0121817	-0.0121936	-0.0122626	-0.0124871	-0.0126017	-0.012736	-0.0128894	-0.0130609	-0.0136725
792.5	92	-0.0145217	-0.0145217	-0.014522	-0.0145362	-0.0146189	-0.0148874	-0.0150245	-0.0151851	-0.0153683	-0.0155731	-0.0163036
792.2	93	-0.0139695	-0.0139695	-0.01397	-0.0139835	-0.0140632	-0.014322	-0.014454	-0.0146086	-0.014785	-0.0149823	-0.0156872
786.55	94	-0.0206368	-0.0206368	-0.0206373	-0.0206586	-0.020781	-0.0211741	-0.0213739	-0.0216074	-0.0218735	-0.0221706	-0.0232273
762.35	95	-0.0147988	-0.0147988	-0.0147993	-0.0148186	-0.0149219	-0.0152405	-0.0153991	-0.015583	-0.0157912	-0.0160221	-0.0168364
762.76	96	-0.00969723	-0.00969736	-0.00969769	-0.00971027	-0.0097779	-0.00998643	-0.0100902	-0.0102105	-0.010347	-0.0104982	-0.0110314
762.81	97	-0.0147899	-0.0147901	-0.0147906	-0.0148098	-0.0149127	-0.0152304	-0.0153886	-0.0155722	-0.0157799	-0.0160103	-0.0168231
761.09	98	-0.0142429	-0.0142429	-0.0142434	-0.0142621	-0.0143627	-0.0146711	-0.0148246	-0.0150026	-0.0152039	-0.0154271	-0.0162141
712.99	99	-0.0770674	-0.0770674	-0.0770728	-0.0772325	-0.0779849	-0.0801059	-0.0811212	-0.0822808	-0.0835757	-0.084996	-0.0899128
715.4	100	-0.0221667	-0.0221667	-0.0221682	-0.0222132	-0.0224261	-0.0230292	-0.0233183	-0.0236488	-0.024018	-0.0244232	-0.0258272
715.85	101	-0.0202698	-0.0202698	-0.0202712	-0.0203121	-0.0205062	-0.0210562	-0.0213201	-0.0216221	-0.0219592	-0.0223292	-0.0236113
715.49	102	-0.0204542	-0.0204542	-0.0204555	-0.020497	-0.0206935	-0.0212497	-0.0215168	-0.0218217	-0.0221624	-0.0225363	-0.0238318
713.4	103	-0.0151315	-0.0151315	-0.0151326	-0.0151639	-0.0153114	-0.0157276	-0.0159268	-0.0161543	-0.0164083	-0.0166869	-0.0176517
711.51	104	-0.021078	-0.021078	-0.0210795	-0.0211239	-0.0213318	-0.0219166	-0.0221961	-0.0225151	-0.0228712	-0.0232617	-0.0246127
710.8	105	-0.0299913	-0.0299913	-0.029993	-0.0300569	-0.0303541	-0.0311885	-0.0315872	-0.0320423	-0.0325502	-0.033107	-0.0350331
708.74	106	-0.00640885	-0.00640885	-0.00640933	-0.00642318	-0.00648762	-0.00666796	-0.00675396	-0.00685204	-0.00696143	-0.00708129	-0.00749551
706.15	107	-0.018896	-0.018896	-0.0188975	-0.0189394	-0.0191328	-0.0196712	-0.0199275	-0.0202197	-0.0205452	-0.0209018	-0.0221328
705.03	108	-0.00801707	-0.00801707	-0.0080177	-0.00803564	-0.0081183	-0.0083481	-0.00845736	-0.00858183	-0.00872051	-0.00887235	-0.00939636
705.05	109	0.00030525	0.00030525	0.000305274	0.000305958	0.000309105	0.00031785	0.000322015	0.000326754	0.000332034	0.000337811	0.000357767
705.15	110	-0.0257338	-0.0257338	-0.0257358	-0.0257933	-0.0260582	-0.026795	-0.0271454	-0.0275446	-0.0279894	-0.0284765	-0.0301573
702.82	111	-0.0110239	-0.0110239	-0.0110246	-0.01105	-0.0111653	-0.0114848	-0.0116364	-0.011809	-0.0120012	-0.0122115	-0.0129368
701.19	112	-0.022519	-0.022519	-0.0225209	-0.0225731	-0.0228112	-0.0234687	-0.0237804	-0.0241354	-0.0245302	-0.0249621	-0.0264506
700.73	113	-0.00714487	-0.00714487	-0.00714546	-0.0071621	-0.00723796	-0.00744703	-0.0075461	-0.00765883	-0.00778429	-0.00792152	-0.00839454
700.66	114	-0.0425663	-0.0425663	-0.0425699	-0.0426692	-0.0431212	-0.0443681	-0.0449589	-0.0456316	-0.0463797	-0.0471979	-0.0500171
677.11	115	-0.0138514	-0.0138514	-0.013853	-0.0138933	-0.0140654	-0.0145208	-0.0147327	-0.0149721	-0.0152369	-0.015525	-0.0165096
675.01	116	-0.0202209	-0.0202209	-0.0202233	-0.0202833	-0.0205378	-0.0212091	-0.021521	-0.0218731	-0.0222624	-0.0226855	-0.0241318
674.97	117	-0.0184432	-0.0184432	-0.0184454	-0.0185002	-0.0187327	-0.0193456	-0.0196304	-0.0199519	-0.0203069	-0.0206934	-0.0220134
674.69	118	-0.0174603	-0.0174603	-0.0174624	-0.0175144	-0.0177349	-0.0183157	-0.0185856	-0.0188901	-0.0192268	-0.019593	-0.0208432
674.11	119	-0.019122	-0.019122	-0.0191244	-0.0191817	-0.0194242	-0.0200624	-0.0203587	-0.0206931	-0.0210627	-0.0214643	-0.0228333
619.68	120	-0.0837915	-0.0837915	-0.083814	-0.0842324	-0.0857588	-0.0894117	-0.0910379	-0.0928432	-0.0948113	-0.0969267	-0.104015
601.64	121	-0.0482353	-0.0482353	-0.0482513	-0.0485371	-0.0495264	-0.0518228	-0.052831	-0.0539452	-0.0551537	-0.0564478	-0.0607585
601.2	122	-0.0201975	-0.0201975	-0.0202043	-0.0203245	-0.0207399	-0.0217035	-0.0221268	-0.0225938	-0.0231006	-0.0236433	-0.0254512
601.5	123	-0.0267597	-0.0267592	-0.0267686	-0.0269267	-0.0274759	-0.0287499	-0.0293123	-0.0299309	-0.0306019	-0.0313203	-0.0337078
592.91	124	-0.0110806	-0.0110806	-0.0110849	-0.0111559	-0.0113959	-0.011945	-0.0121849	-0.0124491	-0.0127353	-0.0130413	-0.0140587
592.86	125	-0.0143104	-0.0143107	-0.0143163	-0.0144081	-0.0147185	-0.0154285	-0.0157386	-0.0160801	-0.0164501	-0.0168455	-0.0181604
592.21	126	-0.0199112	-0.0199112	-0.0199192	-0.0200476	-0.0204814	-0.0214727	-0.0219054	-0.0223818	-0.0228978	-0.0234493	-0.0252828
577.61	127	-0.0281606	-0.0281606	-0.0281745	-0.0283825	-0.0290571	-0.0305619	-0.0312113	-0.0319236	-0.0326923	-0.0335115	-0.036221
575	128	-0.0263185	-0.0263185	-0.0263319	-0.0265312	-0.0271731	-0.0285981	-0.0292116	-0.0298841	-0.0306094	-0.0313819	-0.0339343
577.27	129	-0.0164629	-0.0164632	-0.0164713	-0.0165934	-0.0169889	-0.0178705	-0.0182509	-0.0186677	-0.0191178	-0.0195974	-0.0211839
577.26	130	-0.0199363	-0.0199363	-0.0199462	-0.020094	-0.0205734	-0.0216406	-0.0221012	-0.0226063	-0.0231514	-0.0237322	-0.025653
576.04	131	-0.00928137	-0.00928153	-0.00928619	-0.00935574	-0.00958034	-0.01008	-0.0102952	-0.0105314	-0.0107861	-0.0110576	-0.0119548
572.73	132	-0.0207071	-0.0207071	-0.020718	-0.020878	-0.0213904	-0.0225231	-0.0230102	-0.0235434	-0.0241185	-0.0247308	-0.0267531
571.5	133	-0.0246364	-0.0246364	-0.0246496	-0.0248423	-0.0254572	-0.0268135	-0.0273962	-0.0280337	-0.0287213	-0.0294531	-0.0318688
570.2	134	-0.0193091	-0.0193091	-0.0193197	-0.0194725	-0.0199586	-0.0210285	-0.0214876	-0.0219902	-0.0225316	-0.0231078	-0.0250089
565.08	135	-0.0525588	-0.0525588	-0.0525897	-0.0530259	-0.0543943	-0.0573796	-0.0586557	-0.0600504	-0.0615512	-0.0631478	-0.068403
565.27	136	-0.0106004	-0.0106004	-0.0106066	-0.0106944	-0.01097	-0.0115727	-0.0118301	-0.0121114	-0.0124143	-0.0127361	-0.0137962
554.24	137	-0.0312692	-0.0312686	-0.0312901	-0.031578	-0.0324519	-0.0343255	-0.0351197	-0.0359852	-0.0369141	-0.0378994	-0.0411341
542.29	138	-0.0677598	-0.0677598	-0.0678152	-0.0685101	-0.0705569	-0.0748551	-0.0766622	-0.0786248	-0.0807256	-0.082949	-0.0902222
545.3	139	-0.0265472	-0.0265467	-0.0265674	-0.026832	-0.0276186	-0.0292818	-0.029982	-0.0307426	-0.0315579	-0.0324199	-0.0352436
543.13	140	-0.0395419	-0.0395411	-0.0395731	-0.0399753	-0.0411629	-0.0436613	-0.044712	-0.0458543	-0.0470764	-0.0483701	-0.0526019
541.77	141	-0.0608416	-0.0608416	-0.0608918	-0.0615196	-0.0633642	-0.0672358	-0.0688627	-0.0706294	-0.0725202	-0.074521	-0.0810649
540.38	142	-0.00951654	-0.00951655	-0.00952455	-0.00962395	-0.00991494	-0.0105244	-0.0107802	-0.011058	-0.0113551	-0.0116695	-0.0126973
540.35	143	-0.0102508	-0.0102508	-0.0102594	-0.0103665	-0.0106799	-0.0113364	-0.011612	-0.0119111	-0.0122312	-0.0125698	-0.0136769
539.68	144	-0.0418935	-0.0418935	-0.0419283	-0.0423694	-0.0436559	-0.0463464	-0.0474758	-0.0487015	-0.0500127	-0.0513998	-0.0559335
537.82	145	-0.00145323	-0.00145323	-0.0014545	-0.00147006	-0.00151529	-0.00160955	-0.00164904	-0.00169192	-0.00173773	-0.00178618	-0.00194446
536.7	146	-0.0177284	-0.0177284	-0.0177442	-0.0179359	-0.0184916	-0.019648	-0.020132	-0.0206569	-0.0212184	-0.0218116	-0.0237493
536.3	147	-0.0355467	-0.0355467	-0.0355783	-0.0359635	-0.0370793	-0.0394046	-0.0403776	-0.0414318	-0.0425595	-0.0437507	-0.0476412
500.19	148	-0.014063	-0.0140631	-0.0140841	-0.014297	-0.0148543	-0.0159469	-0.0163926	-0.0168717	-0.0173798	-0.0179132	-0.0196388
493.17	149	-0.0459133	-0.0459134	-0.0459895	-0.0467308	-0.0486354	-0.0523267	-0.053826	-0.0554333	-0.0571352	-0.0589201	-0.0646767
493.06	150	-0.0170921	-0.0170921	-0.0171205	-0.0173964	-0.0181054	-0.0194796	-0.0200378	-0.0206361	-0.0212697	-0.0219341	-0.0240776
492.09	151	-0.0179545	-0.0179545	-0.0179847	-0.0182776	-0.019028	-0.0204792	-0.0210682	-0.0216994	-0.0223676	-0.0230683	-0.0253274
491.64	152	-0.0370247	-0.0370247	-0.0370875	-0.0376938	-0.0392449	-0.0422437	-0.0434604	-0.0447643	-0.0461445	-0.0475916	-0.0522577
443.04	153	-0.0324701	-0.0324703	-0.0325808	-0.0334095	-0.0352652	-0.0385899	-0.0398952	-0.0412773	-0.0427258	-0.0442318	-0.0490258
441.49	154	-0.0226549	-0.0226551	-0.0227339	-0.0233202	-0.0246283	-0.0269648	-0.027882	-0.0288596	-0.0298769	-0.0309344	-0.0342989
440.64	155	0.000231356	0.000231358	0.000232173	0.000238209	0.000251642	0.00027561	0.000285005	0.000294954	0.000305369	0.000316194	0.000350629
440.05	156	-0.0372468	-0.037247	-0.0373788	-0.0383571	-0.0405279	-0.0443989	-0.0459156	-0.0475214	-0.0492023	-0.050949	-0.0565037
439.38	157	-0.0142563	-0.0142564	-0.0143076	-0.014684	-0.0155184	-0.0170048	-0.0175873	-0.0182031	-0.0188481	-0.0195182	-0.0216494
410.92	158	-0.0186894	-0.0186897	-0.0187909	-0.0194301	-0.0207416	-0.0229788	-0.0238394	-0.0247438	-0.0256858	-0.0266601	-0.029737
410.79	159	-0.0234656	-0.023466	-0.0235931	-0.0243956	-0.0260423	-0.0288513	-0.0299318	-0.0310673	-0.03225	-0.0334734	-0.0373366
410.65	160	-0.022591	-0.0225913	-0.0227141	-0.0234882	-0.0250757	-0.0277829	-0.0288241	-0.0299182	-0.0310578	-0.0322365	-0.0359586
410.26	161	-0.0145228	-0.014523	-0.0146024	-0.0151021	-0.0161254	-0.0178695	-0.0185401	-0.0192447	-0.019978	-0.020737	-0.0231338
410.13	162	-0.0104122	-0.0104124	-0.0104693	-0.0108275	-0.0115612	-0.0128117	-0.0132924	-0.0137976	-0.0143237	-0.0148679	-0.016586
361.58	163	-0.032674	-0.032676	-0.0330362	-0.0347788	-0.0379148	-0.0428984	-0.0447592	-0.0466941	-0.0486918	-0.0507203	-0.0571188
360.59	164	-0.0171515	-0.0171525	-0.017344	-0.018266	-0.0199213	-0.0225494	-0.02353	-0.0245494	-0.0256011	-0.0266815	-0.0300539
360.45	165	-0.0186351	-0.0186363	-0.018845	-0.0198487	-0.0216497	-0.0245076	-0.025574	-0.0266826	-0.027827	-0.0290019	-0.0326689
359.75	166	-0.0284321	-0.028434	-0.0287554	-0.0302958	-0.0330552	-0.0374298	-0.0390615	-0.0407576	-0.0425083	-0.0443042	-0.0499124
347.34	167	-0.0259912	-0.0259936	-0.0263443	-0.0279159	-0.030643	-0.0348954	-0.0364702	-0.0381031	-0.0397851	-0.0415088	-0.0468768
345.93	168	-0.0152915	-0.015293	-0.0155039	-0.0164414	-0.0180615	-0.0205827	-0.0215155	-0.0224831	-0.023479	-0.0244993	-0.0276758
345.86	169	-0.0131986	-0.0131995	-0.0133815	-0.014191	-0.0155894	-0.0177655	-0.0185707	-0.0194059	-0.0202654	-0.0211461	-0.0238878
267.76	170	-0.0228862	-0.0229069	-0.0238789	-0.0266868	-0.0306925	-0.0363468	-0.0383575	-0.0404128	-0.0425052	-0.0446289	-0.0511436
268.1	171	-0.0245894	-0.0246113	-0.0256492	-0.0286543	-0.0329457	-0.0390064	-0.041162	-0.0433656	-0.0456092	-0.0478863	-0.0548724
267.59	172	-0.0183291	-0.0183457	-0.0191267	-0.0213798	-0.0245925	-0.0291263	-0.0307384	-0.0323862	-0.0340637	-0.0357662	-0.0409902
267.34	173	-0.0282184	-0.0282442	-0.0294504	-0.0329259	-0.0378791	-0.0448674	-0.047352	-0.0498915	-0.0524768	-0.0551004	-0.0631485
267.39	174	-0.0213081	-0.0213276	-0.0222384	-0.0248628	-0.028603	-0.03388	-0.0357561	-0.0376738	-0.0396259	-0.0416071	-0.0476861

## Sheet: HH_shielding_contributions
Normal mode contributions to shielding (left) and isotope shift (right).
For HH-isotope shift. Calculated at PBE0/pcSseg-1 level. Units: ppm for shielding, ppb for isotope shift.
						Shieldings													Isotope shifts
freq (1/cm)	Mode \ T (K)	0	50	100	150	200	260	280	300	320	340	400		0	50	100	150	200	260	280	300	320	340	400
1627.58	1	-0.0222148	-0.022215	-0.022215	-0.0222148	-0.0222147	-0.0222186	-0.0222233	-0.0222307	-0.0222418	-0.0222574	-0.0223395		2.5829	2.58277	2.58292	2.5829	2.58288	2.58334	2.58388	2.58462	2.58592	2.5879	2.59739
1627.51	2	0.0355787	0.0355789	0.0355789	0.0355787	0.0355784	0.0355848	0.0355922	0.035604	0.0356218	0.035647	0.0357784		30.4213	30.4215	30.4215	30.4213	30.4211	30.4265	30.4329	30.4429	30.4581	30.4797	30.5921
1627.43	3	-0.015034	-0.0150341	-0.0150341	-0.015034	-0.0150339	-0.0150367	-0.0150398	-0.0150448	-0.0150524	-0.0150629	-0.0151186		-46.9837	-46.984	-46.9842	-46.9838	-46.9834	-46.9921	-47.0017	-47.0175	-47.0411	-47.0741	-47.2477
1626.62	4	0.0728397	0.0728402	0.0728406	0.0728397	0.0728391	0.0728527	0.072868	0.0728926	0.0729292	0.072981	0.0732513		14.5364	14.5365	14.5369	14.5364	14.5363	14.539	14.5421	14.5471	14.5544	14.5648	14.6191
1624.53	5	-0.0165739	-0.016574	-0.0165741	-0.0165739	-0.0165738	-0.016577	-0.0165804	-0.016586	-0.0165944	-0.0166063	-0.0166682		0.878967	0.878865	0.87887	0.878967	0.878857	0.879117	0.879286	0.879582	0.880119	0.88062	0.883839
1619.7	6	0.00542687	0.00542691	0.00542691	0.00542688	0.00542683	0.0054279	0.00542907	0.00543093	0.00543376	0.00543769	0.00545828		12.0018	12.0019	12.0019	12.0018	12.0018	12.0041	12.0067	12.0108	12.0171	12.0258	12.0713
1619.19	7	0.00353278	0.0035328	0.00353282	0.00353278	0.00353275	0.00353344	0.00353421	0.00353545	0.00353728	0.00353984	0.00355327		-5.53995	-5.53999	-5.53996	-5.53995	-5.53991	-5.54094	-5.54214	-5.54407	-5.54694	-5.55095	-5.572
1619.36	8	0.0074845	0.00748455	0.0074846	0.00748455	0.00748449	0.00748596	0.00748754	0.00749015	0.00749402	0.00749949	0.00752794		-4.68663	-4.68666	-4.68669	-4.68666	-4.68663	-4.68755	-4.68854	-4.69017	-4.69259	-4.69602	-4.71383
1618.07	9	-0.00655241	-0.00655245	-0.00655245	-0.00655241	-0.00655236	-0.00655366	-0.00655509	-0.00655739	-0.0065608	-0.00656561	-0.00659062		1.38887	1.38888	1.38892	1.38892	1.38891	1.38917	1.38947	1.38994	1.39065	1.39165	1.39692
1609.58	10	-0.0238004	-0.0238005	-0.0238005	-0.0238004	-0.0238004	-0.0238056	-0.0238111	-0.0238197	-0.0238327	-0.0238508	-0.0239446		3.31784	3.31786	3.31803	3.31801	3.31799	3.31855	3.31916	3.32033	3.32185	3.32417	3.33559
1572.98	11	-0.00861253	-0.00861258	-0.00861258	-0.00861253	-0.00861246	-0.00861467	-0.00861697	-0.0086206	-0.00862598	-0.00863342	-0.00867131		5.67593	5.67596	5.67596	5.67593	5.67598	5.67734	5.67895	5.68135	5.68482	5.68973	5.71484
1572.66	12	-0.00889518	-0.00889524	-0.00889524	-0.00889518	-0.00889511	-0.0088974	-0.00889983	-0.00890359	-0.00890916	-0.00891684	-0.00895606		-5.07813	-5.07819	-5.07816	-5.07813	-5.07809	-5.0794	-5.08079	-5.08294	-5.08614	-5.09052	-5.11291
1567.69	13	-0.0250288	-0.025029	-0.025029	-0.0250288	-0.0250288	-0.0250356	-0.0250426	-0.0250534	-0.0250694	-0.0250916	-0.025204		-1.06732	-1.06733	-1.06717	-1.06717	-1.06717	-1.06756	-1.06807	-1.06848	-1.0693	-1.07058	-1.07613
1548.58	14	-0.0148266	-0.0148267	-0.0148267	-0.0148266	-0.0148267	-0.0148313	-0.0148358	-0.0148428	-0.0148532	-0.0148673	-0.0149383		-8.29405	-8.29415	-8.2941	-8.29406	-8.29408	-8.29671	-8.29916	-8.3031	-8.30888	-8.31682	-8.35648
1548.66	15	-0.0178759	-0.0178759	-0.017876	-0.0178759	-0.0178759	-0.0178814	-0.0178869	-0.0178954	-0.0179078	-0.0179248	-0.0180104		-6.4082	-6.40812	-6.40816	-6.4082	-6.40814	-6.4101	-6.41207	-6.41512	-6.41957	-6.42568	-6.45641
1547.18	16	-0.019511	-0.019511	-0.0195111	-0.019511	-0.019511	-0.019517	-0.0195231	-0.0195325	-0.0195461	-0.0195647	-0.0196587		9.61287	9.61287	9.61293	9.61288	9.6129	9.61583	9.61875	9.62331	9.62979	9.63904	9.68478
1542.2	17	-0.0278369	-0.0278371	-0.0278373	-0.0278371	-0.0278372	-0.0278464	-0.0278553	-0.0278691	-0.027889	-0.0279162	-0.0280528		-3.28138	-3.28156	-3.28159	-3.28157	-3.28144	-3.28269	-3.28388	-3.28571	-3.28832	-3.29186	-3.30939
1510.48	18	0.00771655	0.0077166	0.00771665	0.00771661	0.00771664	0.0077196	0.0077224	0.00772675	0.00773302	0.0077415	0.00778346		-10.3676	-10.3678	-10.3677	-10.3677	-10.3677	-10.3716	-10.3754	-10.3812	-10.3896	-10.4009	-10.457
1477.75	19	-0.00334968	-0.00334968	-0.0033497	-0.00334968	-0.00334975	-0.00335133	-0.00335278	-0.00335498	-0.00335808	-0.00336226	-0.0033825		-1.99199	-1.99198	-1.99199	-1.99198	-1.99202	-1.99296	-1.99381	-1.99512	-1.99696	-1.99944	-2.01143
1477.43	20	-0.0194124	-0.0194125	-0.0194125	-0.0194124	-0.0194128	-0.019422	-0.0194306	-0.0194432	-0.0194612	-0.0194855	-0.0196029		-11.4174	-11.4174	-11.4174	-11.4174	-11.4176	-11.423	-11.428	-11.4354	-11.446	-11.4603	-11.5294
1475.4	21	-0.0124066	-0.0124067	-0.0124067	-0.0124067	-0.012407	-0.0124129	-0.0124184	-0.0124266	-0.0124382	-0.0124538	-0.0125294		4.80168	4.80171	4.80183	4.8018	4.80181	4.80403	4.80618	4.80917	4.81366	4.81945	4.84812
1475.57	22	-0.0145393	-0.0145394	-0.0145394	-0.0145393	-0.0145397	-0.0145466	-0.014553	-0.0145626	-0.0145761	-0.0145944	-0.0146829		2.58036	2.58038	2.58038	2.58037	2.58043	2.58175	2.58276	2.58455	2.58693	2.59014	2.6057
1468.69	23	0.000655558	0.000655563	0.000655563	0.000655559	0.00065557	0.000655888	0.000656178	0.000656622	0.000657247	0.000658088	0.000662154		2.68385	2.68387	2.68388	2.68387	2.68391	2.6852	2.6864	2.6882	2.69076	2.69421	2.71085
1468.76	24	0.000439589	0.000439592	0.000439592	0.000439589	0.000439597	0.000439809	0.000440005	0.000440302	0.000440721	0.000441285	0.000444012		-0.524409	-0.524412	-0.524419	-0.524416	-0.524424	-0.524678	-0.524911	-0.525266	-0.525766	-0.526439	-0.529692
1467.38	25	-0.00690109	-0.00690113	-0.00690118	-0.00690115	-0.00690126	-0.00690463	-0.00690776	-0.00691245	-0.00691906	-0.00692796	-0.006971		-13.7015	-13.7015	-13.7016	-13.7015	-13.7018	-13.7085	-13.7147	-13.724	-13.7371	-13.7548	-13.8403
1465.19	26	0.000757626	0.000757631	0.000757636	0.000757627	0.000757645	0.00075802	0.000758367	0.000758888	0.00075962	0.000760605	0.000765357		-24.4784	-24.4785	-24.4785	-24.4784	-24.479	-24.4912	-24.5024	-24.5193	-24.5432	-24.5751	-24.729
1465.19	27	-0.0123153	-0.0123154	-0.0123155	-0.0123153	-0.0123156	-0.0123217	-0.0123273	-0.0123358	-0.0123478	-0.0123638	-0.012441		-2.28854	-2.28856	-2.28858	-2.28855	-2.2886	-2.28974	-2.29078	-2.29236	-2.29465	-2.29763	-2.31191
1464.94	28	-0.0241863	-0.0241865	-0.0241865	-0.0241863	-0.0241869	-0.0241991	-0.02421	-0.0242267	-0.0242502	-0.0242817	-0.0244337		-31.253	-31.2532	-31.2533	-31.253	-31.2538	-31.2695	-31.2836	-31.3052	-31.3356	-31.3762	-31.5726
1463.77	29	0.0754105	0.075411	0.075411	0.0754106	0.0754124	0.07545	0.0754849	0.075537	0.0756109	0.0757095	0.0761854		61.7394	61.7398	61.7397	61.7395	61.741	61.7717	61.8003	61.843	61.9037	61.9844	62.3744
1445.6	30	0.149128	0.149129	0.14913	0.14913	0.149138	0.149229	0.149306	0.149421	0.149581	0.149793	0.150801		20.128	20.1281	20.1283	20.1292	20.1318	20.152	20.1662	20.1878	20.2173	20.2563	20.4302
1386.7	31	-0.0146297	-0.0146298	-0.0146298	-0.0146299	-0.014631	-0.014643	-0.014653	-0.0146673	-0.014687	-0.0147127	-0.0148317		-22.873	-22.8732	-22.8732	-22.8732	-22.875	-22.8938	-22.9094	-22.9318	-22.9626	-23.0029	-23.1891
1386.74	32	-0.00654275	-0.00654275	-0.00654279	-0.00654282	-0.00654331	-0.00654869	-0.00655313	-0.00655954	-0.00656833	-0.00657987	-0.0066331		13.9279	13.928	13.9281	13.928	13.929	13.9405	13.95	13.9638	13.9825	14.007	14.1203
1386.23	33	0.00257394	0.00257396	0.00257396	0.00257395	0.00257416	0.00257628	0.00257802	0.00258056	0.00258403	0.00258857	0.00260954		6.69182	6.69184	6.69187	6.69184	6.6924	6.69791	6.70245	6.70904	6.71805	6.72984	6.78438
1384.05	34	0.00306904	0.00306906	0.00306908	0.00306907	0.00306931	0.00307189	0.003074	0.00307704	0.00308122	0.00308667	0.00311185		2.61898	2.619	2.61902	2.61901	2.61921	2.62142	2.62322	2.62581	2.62937	2.63402	2.65551
1384.06	35	-0.00231608	-0.0023161	-0.00231612	-0.00231611	-0.0023163	-0.00231824	-0.00231983	-0.00232213	-0.00232529	-0.00232939	-0.00234839		-1.95595	-1.95597	-1.95598	-1.95597	-1.95614	-1.95777	-1.95912	-1.96106	-1.96373	-1.96719	-1.98323
1382.96	36	-0.0101235	-0.0101236	-0.0101237	-0.0101236	-0.0101245	-0.010133	-0.01014	-0.0101501	-0.010164	-0.010182	-0.0102654		-8.46215	-8.46222	-8.46228	-8.46225	-8.46297	-8.47008	-8.47594	-8.48445	-8.496	-8.51112	-8.58083
1381.85	37	-0.0265505	-0.0265507	-0.0265507	-0.0265508	-0.0265529	-0.0265755	-0.0265939	-0.0266207	-0.0266571	-0.0267046	-0.026924		-0.700565	-0.70057	-0.70057	-0.700574	-0.700647	-0.701374	-0.701951	-0.702965	-0.703889	-0.705516	-0.712045
1377.55	38	-0.00641372	-0.00641376	-0.00641376	-0.00641379	-0.00641431	-0.0064199	-0.00642444	-0.00643102	-0.00643996	-0.00645165	-0.00650538		18.8911	18.8912	18.8912	18.8913	18.8928	18.9088	18.922	18.941	18.9668	19.0006	19.157
1345.58	39	-0.0215082	-0.0215084	-0.0215084	-0.0215085	-0.0215106	-0.0215324	-0.0215499	-0.0215748	-0.0216086	-0.0216523	-0.0218509		-9.76075	-9.76082	-9.76082	-9.76087	-9.76183	-9.77174	-9.7797	-9.79095	-9.80632	-9.82622	-9.91637
1344.87	40	-0.00648534	-0.00648539	-0.00648544	-0.00648542	-0.00648606	-0.00649266	-0.00649795	-0.00650553	-0.00651575	-0.00652898	-0.00658901		9.16682	9.16689	9.16684	9.16682	9.16782	9.17704	9.18446	9.19498	9.20931	9.22788	9.31212
1345.05	41	0.0021643	0.00216432	0.00216433	0.00216433	0.00216454	0.00216674	0.0021685	0.00217103	0.00217444	0.00217885	0.00219888		8.59806	8.59812	8.59818	8.59816	8.59901	8.60779	8.61479	8.62479	8.63833	8.65585	8.7354
1344.56	42	-0.00250207	-0.00250207	-0.00250209	-0.00250208	-0.00250234	-0.00250489	-0.00250693	-0.00250986	-0.00251381	-0.00251892	-0.00254211		2.80337	2.80341	2.8034	2.80343	2.80368	2.80652	2.80881	2.81208	2.81648	2.82215	2.84803
1339.26	43	-0.0162644	-0.0162644	-0.0162645	-0.0162644	-0.0162662	-0.0162834	-0.0162971	-0.0163165	-0.0163427	-0.0163765	-0.0165294		0.992984	0.993113	0.992991	0.992987	0.993061	0.993872	0.994544	0.995524	0.996862	0.99861	1.00671
1340.1	44	0.0105994	0.0105995	0.0105996	0.0105996	0.0106007	0.0106119	0.0106208	0.0106334	0.0106504	0.0106724	0.0107719		27.4285	27.4285	27.4287	27.4287	27.4317	27.4604	27.4833	27.5158	27.5596	27.6163	27.873
1339.45	45	-0.0237631	-0.0237631	-0.0237632	-0.0237632	-0.0237658	-0.0237909	-0.0238108	-0.0238392	-0.0238775	-0.0239267	-0.0241502		-28.0155	-28.0155	-28.0157	-28.0156	-28.0187	-28.0483	-28.0717	-28.1053	-28.1503	-28.2084	-28.4718
1338.25	46	-0.0144399	-0.01444	-0.0144401	-0.0144401	-0.0144417	-0.014457	-0.0144693	-0.0144865	-0.01451	-0.01454	-0.0146766		-4.05519	-4.05522	-4.05533	-4.05525	-4.05571	-4.06008	-4.06364	-4.06847	-4.0752	-4.08365	-4.12256
1311.54	47	-0.0212632	-0.0212632	-0.0212634	-0.0212634	-0.0212665	-0.0212927	-0.0213131	-0.0213419	-0.0213802	-0.0214292	-0.0216485		-11.2591	-11.2591	-11.2592	-11.2592	-11.2609	-11.2748	-11.2857	-11.3011	-11.3215	-11.3475	-11.4644
1312.57	48	-0.009907	-0.009907	-0.00990707	-0.00990706	-0.00990849	-0.00992065	-0.00993011	-0.00994346	-0.00996124	-0.00998402	-0.0100858		13.2897	13.2899	13.2898	13.29	13.2917	13.3082	13.3209	13.3386	13.3625	13.393	13.5295
1311.77	49	-0.0130735	-0.0130736	-0.0130736	-0.0130737	-0.0130755	-0.0130917	-0.0131042	-0.0131218	-0.0131454	-0.0131755	-0.0133102		-2.08532	-2.08534	-2.08534	-2.08535	-2.08556	-2.08826	-2.09028	-2.09303	-2.09692	-2.10175	-2.12356
1290.92	50	-0.0209623	-0.0209625	-0.0209625	-0.0209627	-0.0209659	-0.0209946	-0.0210167	-0.0210475	-0.0210883	-0.0211402	-0.0213706		-11.0758	-11.0759	-11.0758	-11.076	-11.0776	-11.0929	-11.1046	-11.1209	-11.1424	-11.1698	-11.2917
1290.43	51	0.00519649	0.00519653	0.00519657	0.00519657	0.00519737	0.00520452	0.00521001	0.00521765	0.00522777	0.00524071	0.00529797		20.6752	20.6754	20.6754	20.6756	20.6787	20.7071	20.7289	20.7593	20.7995	20.8509	21.0784
1289.36	52	-0.00411144	-0.00411147	-0.00411151	-0.00411151	-0.00411218	-0.00411787	-0.00412223	-0.00412831	-0.00413638	-0.00414663	-0.00419212		-4.4623	-4.46233	-4.46237	-4.46237	-4.4631	-4.46927	-4.474	-4.48059	-4.48934	-4.50046	-4.5498
1288.83	53	-0.00269815	-0.00269817	-0.00269817	-0.00269819	-0.00269861	-0.00270235	-0.00270522	-0.00270922	-0.00271452	-0.00272128	-0.00275113		0.172768	0.172769	0.172769	0.17277	0.172814	0.173026	0.173192	0.173424	0.173735	0.174134	0.175938
1287.87	54	-0.00858421	-0.00858428	-0.00858434	-0.00858435	-0.00858577	-0.00859775	-0.00860692	-0.00861969	-0.00863664	-0.00865823	-0.00875347		-1.89364	-1.89365	-1.89367	-1.89367	-1.89399	-1.89665	-1.89869	-1.90152	-1.90529	-1.91013	-1.93124
1253.55	55	-0.0159939	-0.015994	-0.0159941	-0.0159942	-0.0159976	-0.0160246	-0.0160446	-0.016072	-0.016108	-0.0161533	-0.0163507		2.95526	2.95528	2.95515	2.95532	2.95595	2.96093	2.96447	2.96954	2.97633	2.98456	3.02103
1254.56	56	0.00578748	0.00578748	0.00578752	0.00578754	0.00578878	0.00579848	0.00580568	0.00581558	0.00582854	0.0058449	0.00591602		3.33156	3.33154	3.33158	3.33158	3.33229	3.33788	3.34204	3.34774	3.35518	3.36461	3.40556
1253.65	57	-0.0167877	-0.0167879	-0.0167879	-0.0167881	-0.0167917	-0.01682	-0.0168408	-0.0168696	-0.0169075	-0.016955	-0.0171619		-10.432	-10.4321	-10.4321	-10.4323	-10.4345	-10.4521	-10.4651	-10.4831	-10.5067	-10.5364	-10.6652
1253.6	58	-0.00893634	-0.00893634	-0.00893642	-0.00893645	-0.00893844	-0.00895343	-0.00896458	-0.00897992	-0.009	-0.00902534	-0.00913547		-1.21171	-1.21171	-1.21172	-1.21173	-1.212	-1.21405	-1.21557	-1.21766	-1.22034	-1.22379	-1.23865
1248.26	59	-0.0265244	-0.0265244	-0.0265247	-0.0265248	-0.0265309	-0.0265769	-0.0266108	-0.0266573	-0.0267182	-0.0267948	-0.0271278		-0.841625	-0.841625	-0.841633	-0.841651	-0.84204	-0.844582	-0.846338	-0.848673	-0.851643	-0.855292	-0.870927
1226.39	60	-0.00762911	-0.00762918	-0.00762918	-0.00762929	-0.0076313	-0.00764617	-0.00765694	-0.00767161	-0.00769071	-0.00771462	-0.00781732		7.69939	7.69933	7.69945	7.69945	7.70149	7.71669	7.7276	7.74246	7.7618	7.78601	7.88994
1224.48	61	-0.0168176	-0.0168176	-0.0168178	-0.0168179	-0.0168225	-0.0168556	-0.0168796	-0.0169122	-0.0169546	-0.0170077	-0.0172352		-5.72649	-5.72639	-5.72644	-5.72649	-5.72818	-5.73958	-5.74782	-5.75893	-5.77349	-5.79179	-5.86976
1224.28	62	-0.0195035	-0.0195037	-0.0195037	-0.019504	-0.0195092	-0.0195478	-0.0195756	-0.0196135	-0.0196629	-0.0197243	-0.0199884		0.0873717	0.0873723	0.0873723	0.0873711	0.0873603	0.0873529	0.0873669	0.0875586	0.0874524	0.087696	0.0881576
1212.86	63	-0.00972216	-0.00972224	-0.00972232	-0.00972241	-0.00972524	-0.00974553	-0.00976013	-0.00977991	-0.00980556	-0.00983746	-0.00997388		-0.298312	-0.298315	-0.298395	-0.29832	-0.298484	-0.299107	-0.299555	-0.300162	-0.300949	-0.30185	-0.306036
1210.95	64	-0.0140123	-0.0140124	-0.0140125	-0.0140126	-0.0140168	-0.0140463	-0.0140675	-0.0140962	-0.0141334	-0.0141797	-0.0143778		-1.45047	-1.45048	-1.4505	-1.45051	-1.45107	-1.45425	-1.45652	-1.45958	-1.46355	-1.46836	-1.48972
1209.46	65	0.0254367	0.0254369	0.0254371	0.0254374	0.025445	0.0254992	0.025538	0.0255906	0.0256586	0.0257433	0.0261046		-2.67131	-2.67133	-2.67135	-2.67137	-2.6723	-2.67751	-2.68129	-2.68622	-2.69315	-2.70153	-2.73758
1132.46	66	-0.0237455	-0.0237457	-0.0237457	-0.0237466	-0.023759	-0.0238351	-0.0238863	-0.0239536	-0.0240387	-0.0241424	-0.0245687		2.28697	2.28676	2.28676	2.28684	2.2882	2.29524	2.29977	2.30629	2.31402	2.32374	2.36457
1134.24	67	-0.00687078	-0.00687084	-0.00687084	-0.0068711	-0.00687465	-0.00689648	-0.00691116	-0.0069305	-0.00695497	-0.00698477	-0.00710747		6.1009	6.10084	6.10095	6.10107	6.10433	6.12371	6.13675	6.15393	6.17554	6.202	6.31095
1133.37	68	-0.0145916	-0.0145916	-0.0145918	-0.0145922	-0.0145999	-0.0146465	-0.0146778	-0.014719	-0.014771	-0.0148345	-0.0150958		-7.58122	-7.58122	-7.58129	-7.58151	-7.58554	-7.60984	-7.62616	-7.64766	-7.6747	-7.70778	-7.84387
1132.71	69	-0.0183802	-0.0183803	-0.0183803	-0.018381	-0.0183908	-0.0184497	-0.0184892	-0.0185413	-0.018607	-0.0186871	-0.0190171		4.11289	4.11273	4.11292	4.11288	4.11503	4.12803	4.13679	4.14832	4.16309	4.18087	4.25458
1130.28	70	-0.0211055	-0.0211055	-0.0211057	-0.0211063	-0.0211177	-0.0211862	-0.0212321	-0.0212925	-0.0213687	-0.0214616	-0.0218431		-7.42955	-7.42943	-7.42962	-7.42985	-7.43397	-7.45853	-7.47495	-7.49652	-7.52375	-7.55684	-7.69265
1104.16	71	-0.0173577	-0.0173578	-0.017358	-0.0173587	-0.0173697	-0.0174341	-0.0174765	-0.0175318	-0.0176011	-0.0176848	-0.0180251		1.60443	1.60444	1.60428	1.60452	1.6055	1.61129	1.61512	1.62012	1.62622	1.63399	1.66554
1104.6	72	-0.0153819	-0.015382	-0.0153821	-0.0153828	-0.0153925	-0.0154494	-0.0154869	-0.0155359	-0.015597	-0.0156711	-0.0159724		2.1855	2.18552	2.18554	2.18563	2.18716	2.19526	2.20043	2.20738	2.21622	2.22675	2.26995
1104.13	73	-0.021	-0.0210002	-0.0210004	-0.0210013	-0.0210148	-0.0210927	-0.0211438	-0.0212107	-0.0212945	-0.0213958	-0.0218078		-4.50089	-4.50093	-4.50112	-4.50116	-4.50423	-4.52108	-4.53196	-4.54639	-4.56461	-4.58644	-4.67518
1099.72	74	0.0203427	0.0203428	0.0203428	0.0203439	0.0203574	0.0204348	0.0204853	0.0205515	0.020634	0.0207339	0.021139		-0.167396	-0.167397	-0.167397	-0.167385	-0.167305	-0.167136	-0.167293	-0.167114	-0.167175	-0.1673	-0.167716
987.06	75	-0.0173398	-0.0173398	-0.01734	-0.0173425	-0.0173682	-0.017487	-0.0175577	-0.0176465	-0.0177536	-0.0178794	-0.0183655		-0.0636794	-0.0636794	-0.0638553	-0.0637005	-0.0640491	-0.0645755	-0.0647266	-0.0651306	-0.0656111	-0.0663486	-0.0691058
989.61	76	-0.00558571	-0.00558577	-0.00558577	-0.00558661	-0.0055947	-0.00563243	-0.00565504	-0.00568336	-0.00571756	-0.00575768	-0.00591285		4.33798	4.33793	4.33803	4.33858	4.34487	4.37427	4.39173	4.41372	4.44027	4.47154	4.59205
989.01	77	-0.0161603	-0.0161604	-0.0161605	-0.0161629	-0.0161864	-0.0162961	-0.0163617	-0.0164437	-0.0165429	-0.0166594	-0.0171092		-5.73202	-5.73218	-5.73208	-5.73306	-5.74148	-5.78062	-5.80402	-5.83324	-5.86857	-5.91007	-6.07022
987.1	78	-0.0155145	-0.0155145	-0.0155147	-0.0155169	-0.0155399	-0.015646	-0.0157095	-0.0157889	-0.0158848	-0.0159973	-0.0164322		1.68126	1.68126	1.68128	1.6815	1.68384	1.69498	1.70141	1.70971	1.71975	1.73157	1.77659
983.62	79	-0.00910902	-0.00910911	-0.00910913	-0.00911057	-0.00912433	-0.00918796	-0.00922571	-0.0092731	-0.0093302	-0.00939709	-0.00965559		0.70476	0.704668	0.704769	0.704784	0.705971	0.710871	0.713932	0.717541	0.722009	0.727238	0.747421
980.96	80	-0.0274704	-0.0274707	-0.0274708	-0.0274752	-0.0275175	-0.0277117	-0.0278272	-0.0279713	-0.0281452	-0.0283488	-0.0291343		-0.727622	-0.727629	-0.727631	-0.727813	-0.729374	-0.736016	-0.739824	-0.744505	-0.750075	-0.756517	-0.781901
981.98	81	-0.000115351	-0.000115351	-0.000115352	-0.000115369	-0.000115547	-0.000116359	-0.000116842	-0.000117446	-0.000118173	-0.000119026	-0.00012231		1.16326	1.16327	1.16327	1.16346	1.16521	1.17334	1.17818	1.18422	1.19151	1.20009	1.23308
968.04	82	-0.00986409	-0.00986409	-0.0098641	-0.00986592	-0.00988275	-0.00995752	-0.0100014	-0.0100559	-0.0101213	-0.0101977	-0.0104899		-0.356633	-0.356535	-0.356536	-0.356609	-0.357365	-0.360231	-0.361897	-0.363961	-0.366328	-0.369199	-0.380135
764.45	83	-0.0985212	-0.0985212	-0.0985245	-0.0986502	-0.0993291	-0.101428	-0.102475	-0.10369	-0.105065	-0.106592	-0.111978		26.3695	26.3695	26.3713	26.4265	26.6899	27.4356	27.7907	28.1981	28.654	29.1503	30.8716
843.39	84	-0.014317	-0.014317	-0.0143171	-0.0143258	-0.0143835	-0.0145886	-0.0146975	-0.0148272	-0.0149774	-0.0151472	-0.0157653		1.2655	1.2655	1.26551	1.26616	1.27069	1.28734	1.2963	1.30704	1.31954	1.33372	1.38569
844.55	85	-0.0119502	-0.0119502	-0.0119503	-0.0119574	-0.0120051	-0.0121754	-0.0122659	-0.0123737	-0.0124985	-0.0126399	-0.0131539		-0.336815	-0.336815	-0.336819	-0.337035	-0.33831	-0.34329	-0.345922	-0.34905	-0.352664	-0.356895	-0.37059
766.17	86	-0.0945892	-0.0945892	-0.0945923	-0.094711	-0.0953551	-0.0973537	-0.0983515	-0.0995091	-0.100822	-0.102279	-0.107425		-10.4559	-10.4559	-10.4568	-10.4826	-10.6044	-10.9424	-11.102	-11.2819	-11.4842	-11.7035	-12.4553
802.77	87	-0.00712562	-0.00712562	-0.00712576	-0.00713207	-0.00716998	-0.00729518	-0.00735967	-0.00743537	-0.00752199	-0.007619	-0.00796645		-0.80664	-0.80664	-0.806656	-0.807382	-0.811723	-0.826019	-0.833453	-0.842081	-0.851865	-0.862911	-0.902446
803.08	88	-0.0116364	-0.0116364	-0.0116366	-0.0116469	-0.0117087	-0.0119129	-0.012018	-0.0121417	-0.012283	-0.0124413	-0.0130083		0.662921	0.662921	0.662934	0.66352	0.667041	0.678676	0.684661	0.691707	0.699758	0.708777	0.74108
800.89	89	-0.011258	-0.011258	-0.0112583	-0.0112684	-0.011329	-0.0115289	-0.0116315	-0.011752	-0.0118899	-0.0120443	-0.0125965		0.891213	0.891213	0.891228	0.891941	0.896497	0.911221	0.918933	0.928029	0.938628	0.9502	0.992348
793.18	90	-0.0114389	-0.011439	-0.0114393	-0.0114504	-0.0115151	-0.0117261	-0.0118336	-0.0119598	-0.0121038	-0.0122648	-0.0128391		-1.47892	-1.47906	-1.47909	-1.48049	-1.48869	-1.51556	-1.52929	-1.54542	-1.56384	-1.58445	-1.65805
792.25	91	-0.00967941	-0.00967941	-0.00967975	-0.00968911	-0.0097443	-0.00992349	-0.010015	-0.010122	-0.0102443	-0.0103809	-0.0108681		2.50206	2.50206	2.50199	2.50447	2.51832	2.56365	2.5867	2.61406	2.64504	2.67999	2.80433
791.7	92	-0.0124332	-0.0124332	-0.0124336	-0.0124457	-0.0125169	-0.012748	-0.0128658	-0.0130036	-0.0131612	-0.013337	-0.0139643		2.08852	2.08852	2.08841	2.0905	2.10197	2.13941	2.15869	2.18148	2.20717	2.23609	2.33932
791.14	93	-0.0145896	-0.0145896	-0.0145901	-0.0146044	-0.0146882	-0.01496	-0.0150983	-0.0152604	-0.0154456	-0.0156522	-0.0163893		-0.620055	-0.620055	-0.620082	-0.620831	-0.62499	-0.637971	-0.644279	-0.651832	-0.660588	-0.669912	-0.702108
784.88	94	-0.0215899	-0.0215902	-0.0215907	-0.0216134	-0.0217427	-0.0221579	-0.0223684	-0.0226144	-0.0228945	-0.0232069	-0.0243183		-0.95311	-0.953385	-0.953422	-0.954782	-0.961695	-0.983776	-0.994557	-1.00702	-1.02109	-1.03636	-1.09101
762	95	-0.0149097	-0.0149097	-0.0149102	-0.0149297	-0.0150343	-0.0153558	-0.0155158	-0.0157015	-0.0159115	-0.0161445	-0.016966		-0.110853	-0.110853	-0.11086	-0.111085	-0.112367	-0.11526	-0.116743	-0.118437	-0.120328	-0.122403	-0.129583
762.66	96	-0.0096391	-0.0096391	-0.00963943	-0.00965193	-0.00971928	-0.00992642	-0.0100296	-0.0101493	-0.0102848	-0.0104351	-0.0109651		0.0581374	0.0582645	0.0582665	0.0583421	0.058621	0.0600013	0.0606251	0.0612149	0.0621676	0.0630762	0.06628
762.61	97	-0.0142739	-0.0142739	-0.0142744	-0.0142929	-0.0143927	-0.0146996	-0.0148522	-0.0150295	-0.0152303	-0.0154529	-0.0162378		0.515983	0.516177	0.516193	0.516823	0.520081	0.530828	0.5364	0.542655	0.549546	0.557421	0.585259
759.34	98	-0.0153945	-0.0153945	-0.0153951	-0.0154157	-0.0155257	-0.015862	-0.0160291	-0.0162227	-0.0164417	-0.0166846	-0.0175395		-1.15161	-1.15161	-1.15167	-1.15352	-1.16295	-1.19083	-1.20446	-1.22017	-1.23782	-1.25753	-1.32543
713.56	99	-0.0447811	-0.0447811	-0.0447843	-0.0448767	-0.0453126	-0.046543	-0.0471319	-0.0478046	-0.0485558	-0.0493799	-0.0522332		32.2862	32.2862	32.2885	32.3558	32.6723	33.5629	33.9893	34.4762	35.0199	35.6161	37.6797
714.87	100	-0.0206303	-0.0206303	-0.0206318	-0.0206738	-0.0208732	-0.021436	-0.0217058	-0.0220142	-0.0223586	-0.0227369	-0.0240462		1.53639	1.53639	1.53648	1.53933	1.55292	1.59318	1.61248	1.6346	1.65938	1.68631	1.78102
715.85	101	-0.0201432	-0.0201432	-0.0201446	-0.0201852	-0.0203784	-0.020925	-0.0211873	-0.021487	-0.021822	-0.0221897	-0.0234642		0.126587	0.126587	0.126596	0.126851	0.127779	0.131206	0.132851	0.135032	0.137138	0.139448	0.147128
715.43	102	-0.0200759	-0.0200759	-0.0200772	-0.0201179	-0.0203111	-0.020857	-0.0211188	-0.0214181	-0.0217525	-0.0221198	-0.0233914		0.37827	0.37827	0.378295	0.379062	0.382412	0.392691	0.397921	0.40356	0.409861	0.416467	0.440408
713.05	103	-0.0148371	-0.0148371	-0.0148382	-0.0148689	-0.0150138	-0.0154223	-0.0156178	-0.015841	-0.0160903	-0.0163638	-0.0173104		0.294398	0.294398	0.294416	0.294961	0.297618	0.305271	0.308968	0.313205	0.317951	0.323171	0.341317
709.99	104	-0.0308551	-0.0308551	-0.0308569	-0.0309232	-0.0312307	-0.0320929	-0.0325046	-0.0329744	-0.0334986	-0.0340731	-0.03606		-9.77708	-9.77708	-9.7774	-9.79935	-9.89895	-10.1763	-10.3086	-10.4593	-10.6274	-10.8114	-11.4472
710.52	105	-0.0253799	-0.0253799	-0.0253817	-0.0254357	-0.0256879	-0.0263959	-0.0267339	-0.0271197	-0.0275502	-0.0280221	-0.0296538		4.6114	4.6114	4.6113	4.62126	4.66621	4.79259	4.85328	4.9226	5.00001	5.08492	5.37931
708.71	106	-0.00647305	-0.00647296	-0.00647344	-0.00648743	-0.00655261	-0.00673467	-0.00682152	-0.00692058	-0.00703106	-0.00715213	-0.00757049		-0.0642027	-0.0641113	-0.0641161	-0.0642546	-0.0649918	-0.0667034	-0.0675636	-0.0685448	-0.0696391	-0.0708382	-0.0749818
704.22	107	-0.0290008	-0.0290008	-0.0290031	-0.0290684	-0.0293687	-0.0302023	-0.0305986	-0.03105	-0.0315529	-0.0321033	-0.0340026		-10.1048	-10.1048	-10.1056	-10.1291	-10.236	-10.5311	-10.6711	-10.8303	-11.0076	-11.2015	-11.8698
704.91	108	-0.00168725	-0.00168725	-0.00168738	-0.00169115	-0.00170855	-0.00175691	-0.00177991	-0.0018061	-0.00183529	-0.00186725	-0.00197753		6.32982	6.32982	6.33032	6.34449	6.40975	6.59119	6.67745	6.77573	6.88522	7.00511	7.41883
705.15	109	-0.00419258	-0.00419252	-0.00419285	-0.00420222	-0.00424544	-0.00436542	-0.00442251	-0.00448754	-0.00456001	-0.00463936	-0.0049132		-4.49783	-4.49777	-4.49813	-4.50817	-4.55454	-4.68327	-4.74452	-4.8143	-4.89204	-4.97717	-5.27097
704.16	110	-0.0275716	-0.0275716	-0.0275738	-0.027636	-0.027922	-0.0287157	-0.0290929	-0.0295224	-0.0300008	-0.0305246	-0.0323314		-1.83783	-1.83783	-1.838	-1.84275	-1.86377	-1.92069	-1.94743	-1.97775	-2.01139	-2.04811	-2.1741
702.13	111	-0.0137934	-0.0137934	-0.0137945	-0.0138262	-0.0139712	-0.0143722	-0.0145624	-0.0147789	-0.01502	-0.0152838	-0.0161931		-2.76951	-2.76951	-2.76991	-2.77627	-2.80589	-2.88744	-2.92605	-2.96997	-3.01882	-3.07225	-3.25626
700.79	112	-0.0280436	-0.0280432	-0.0280456	-0.0281113	-0.0284086	-0.0292292	-0.0296181	-0.0300605	-0.0305529	-0.0310916	-0.0329481		-5.5246	-5.5242	-5.52467	-5.53815	-5.59743	-5.76051	-5.83769	-5.9251	-6.02273	-6.12947	-6.49754
700.74	113	-0.00680531	-0.00680531	-0.00680588	-0.00682172	-0.00689397	-0.00709311	-0.00718747	-0.00729484	-0.00741434	-0.00754505	-0.00799559		0.339559	0.339559	0.339588	0.340378	0.343983	0.353919	0.358628	0.363985	0.369947	0.37647	0.39895
700.29	114	-0.0434623	-0.0434623	-0.0434659	-0.0435675	-0.0440303	-0.0453049	-0.0459086	-0.0465955	-0.0473599	-0.0481959	-0.0510771		-0.895941	-0.895941	-0.896027	-0.898328	-0.909149	-0.936794	-0.949788	-0.963874	-0.98022	-0.998059	-1.06003
676.83	115	-0.0138069	-0.0138069	-0.0138086	-0.0138488	-0.0140206	-0.014475	-0.0146865	-0.0149253	-0.0151892	-0.0154766	-0.0164589		0.0444768	0.0444768	0.0444769	0.0445232	0.0448243	0.0457957	0.0462839	0.0468513	0.0477183	0.0484356	0.0507187
674.24	116	-0.0192863	-0.0192863	-0.0192887	-0.0193464	-0.0195906	-0.0202336	-0.0205322	-0.0208692	-0.0212417	-0.0216467	-0.0230295		0.934505	0.934505	0.934588	0.936885	0.947223	0.975472	0.988804	1.00394	1.02076	1.0388	1.10231
674.78	117	-0.015964	-0.015964	-0.0159659	-0.0160133	-0.0162146	-0.0167451	-0.0169916	-0.0172698	-0.0175774	-0.017912	-0.0190543		2.47921	2.47921	2.47951	2.48688	2.51813	2.60052	2.6388	2.68201	2.72948	2.78143	2.95913
673.84	118	-0.0222059	-0.0222059	-0.0222087	-0.0222753	-0.0225573	-0.0232993	-0.0236437	-0.024032	-0.0244615	-0.0249286	-0.0265232		-4.74561	-4.74561	-4.74623	-4.76091	-4.82247	-4.98354	-5.05814	-5.14187	-5.23472	-5.33561	-5.67999
673.79	119	-0.020745	-0.020745	-0.0207475	-0.0208098	-0.0210733	-0.0217664	-0.0220882	-0.0224513	-0.0228526	-0.0232889	-0.0247786		-1.62295	-1.62295	-1.62316	-1.62815	-1.64912	-1.70403	-1.72948	-1.75817	-1.78985	-1.8246	-1.94529
617.49	120	-0.085226	-0.085226	-0.0852495	-0.085684	-0.0872592	-0.0910146	-0.0926837	-0.0945354	-0.096553	-0.0987206	-0.105978		-1.4345	-1.4345	-1.43555	-1.45162	-1.50039	-1.60292	-1.64579	-1.69218	-1.74168	-1.79388	-1.96359
601.49	121	-0.0503188	-0.050318	-0.0503355	-0.0506329	-0.0516657	-0.0540651	-0.0551187	-0.0562811	-0.0575437	-0.0588937	-0.0633947		-2.08354	-2.0827	-2.08423	-2.09573	-2.13931	-2.24232	-2.28771	-2.33589	-2.39001	-2.44594	-2.63614
601.22	122	-0.0190288	-0.0190288	-0.0190354	-0.0191483	-0.0195397	-0.0204476	-0.0208464	-0.0212863	-0.0217642	-0.0222755	-0.0239784		1.16877	1.16877	1.16885	1.17612	1.20016	1.25592	1.28041	1.30744	1.3364	1.3678	1.47279
601.53	123	-0.0255909	-0.0255909	-0.0255998	-0.025751	-0.0262758	-0.0274942	-0.0280295	-0.0286202	-0.0292613	-0.0299479	-0.0322355		1.16883	1.16839	1.1688	1.1757	1.20012	1.25577	1.28274	1.31073	1.34054	1.37243	1.47232
592.66	124	-0.0109323	-0.0109323	-0.0109367	-0.0110069	-0.0112444	-0.0117875	-0.0120244	-0.0122856	-0.0125684	-0.0128708	-0.0138761		0.148226	0.148226	0.148271	0.148918	0.151445	0.157434	0.160414	0.16351	0.166894	0.170538	0.182562
592.73	125	-0.0132816	-0.0132816	-0.0132871	-0.013372	-0.0136601	-0.0143193	-0.0146071	-0.0149238	-0.0152672	-0.0156345	-0.0168548		1.02881	1.02905	1.02924	1.03606	1.05838	1.10919	1.13149	1.15629	1.1829	1.21107	1.3056
591.47	126	-0.0212767	-0.0212767	-0.0212853	-0.0214234	-0.0218889	-0.0229516	-0.0234152	-0.0239256	-0.0244783	-0.0250689	-0.0270321		-1.36548	-1.36548	-1.3661	-1.37576	-1.40752	-1.4789	-1.50982	-1.54378	-1.58047	-1.6196	-1.7493
577.27	127	-0.0279614	-0.0279614	-0.0279752	-0.0281826	-0.0288549	-0.0303517	-0.0309977	-0.0317061	-0.0324706	-0.0332852	-0.0359792		0.199256	0.199256	0.199267	0.199893	0.202238	0.210199	0.21363	0.21748	0.221714	0.226298	0.241829
574.94	128	-0.0221445	-0.0221445	-0.0221558	-0.0223235	-0.0228636	-0.0240621	-0.0245784	-0.0251442	-0.0257544	-0.0264044	-0.0285525		4.17398	4.17398	4.17611	4.2077	4.30951	4.53592	4.63324	4.7399	4.85494	4.97747	5.3818
576.99	129	-0.0175506	-0.0175506	-0.0175593	-0.0176897	-0.0181123	-0.0190528	-0.0194587	-0.0199037	-0.0203839	-0.0208956	-0.0225877		-1.08772	-1.08744	-1.088	-1.09633	-1.12338	-1.1823	-1.20779	-1.23604	-1.26616	-1.29823	-1.4038
576.66	130	-0.0210178	-0.0210178	-0.0210283	-0.0211851	-0.0216926	-0.0228217	-0.0233086	-0.0238425	-0.0244185	-0.0250322	-0.0270613		-1.08145	-1.08145	-1.08209	-1.09107	-1.11925	-1.18114	-1.20745	-1.2362	-1.26714	-1.30003	-1.40837
575.04	131	-0.0115234	-0.0115234	-0.0115293	-0.0116165	-0.0118974	-0.0125211	-0.0127897	-0.0130839	-0.0134014	-0.0137397	-0.0148574		-2.24203	-2.24187	-2.24308	-2.26077	-2.31703	-2.44103	-2.49445	-2.5525	-2.61529	-2.6821	-2.9026
572.45	132	-0.0201038	-0.0201038	-0.0201145	-0.0202704	-0.0207693	-0.021871	-0.0223448	-0.0228637	-0.0234229	-0.0240183	-0.0259843		0.603276	0.603276	0.603527	0.607552	0.621049	0.652089	0.665434	0.679705	0.695579	0.712532	0.768785
571.03	133	-0.0202728	-0.0202728	-0.0202838	-0.020443	-0.0209504	-0.0220689	-0.0225493	-0.0230751	-0.0236414	-0.0242445	-0.026235		4.36358	4.36358	4.36585	4.39933	4.50678	4.74463	4.84697	4.9586	5.07989	5.2086	5.63378
569.59	134	-0.0252957	-0.0252957	-0.0253097	-0.0255112	-0.0261508	-0.0275568	-0.02816	-0.02882	-0.029531	-0.0302874	-0.0327825		-5.98665	-5.98666	-5.99006	-6.03869	-6.19214	-6.52833	-6.67232	-6.8298	-6.99935	-7.17966	-7.77359
564.91	135	-0.0497073	-0.0497064	-0.0497357	-0.050149	-0.051445	-0.0542713	-0.0554803	-0.0568004	-0.0582209	-0.0597309	-0.0647055		2.85152	2.8524	2.85399	2.87682	2.94923	3.10824	3.17542	3.24998	3.33029	3.41683	3.69752
565.25	136	-0.0120035	-0.0120035	-0.0120106	-0.0121102	-0.0124227	-0.0131045	-0.013396	-0.0137147	-0.0140575	-0.0144219	-0.0156224		-1.40312	-1.40312	-1.40397	-1.41579	-1.45272	-1.53182	-1.56589	-1.60337	-1.64322	-1.68581	-1.82614
554.18	137	-0.0313747	-0.0313747	-0.0313964	-0.0316847	-0.0325621	-0.0344414	-0.0352383	-0.0361073	-0.0370394	-0.038028	-0.0412737		-0.105583	-0.106147	-0.106221	-0.106626	-0.110165	-0.115903	-0.118585	-0.122159	-0.125312	-0.128657	-0.139638
542.71	138	-0.0706085	-0.0706085	-0.0706658	-0.071387	-0.0735138	-0.0779847	-0.0798644	-0.0819061	-0.0840918	-0.0864052	-0.0939722		-2.84871	-2.84871	-2.85067	-2.87695	-2.95693	-3.12957	-3.20218	-3.28129	-3.36618	-3.45622	-3.75002
545.22	139	-0.0273613	-0.0273613	-0.0273828	-0.0276561	-0.0284679	-0.0301803	-0.0309015	-0.031686	-0.0325257	-0.0334148	-0.0363251		-0.814139	-0.814626	-0.81533	-0.824006	-0.849299	-0.898556	-0.919479	-0.943385	-0.967805	-0.994856	-1.08151
541.43	140	-0.035963	-0.035963	-0.0359928	-0.0363646	-0.0374572	-0.0397481	-0.0407107	-0.0417559	-0.0428744	-0.044058	-0.0479288		3.57884	3.57812	3.58026	3.61066	3.70574	3.91319	4.00136	4.0985	4.20205	4.31207	4.67311
541.63	141	-0.0607946	-0.0607946	-0.0608448	-0.0614721	-0.0633164	-0.067185	-0.0688108	-0.0705761	-0.0724655	-0.0744648	-0.0810038		0.0470132	0.0470133	0.047052	0.0475372	0.0477935	0.0507133	0.0519405	0.053273	0.0546992	0.0562083	0.0611445
540.4	142	-0.00926466	-0.00926466	-0.00927228	-0.00936923	-0.00965252	-0.0102456	-0.0104947	-0.0107651	-0.0110544	-0.0113604	-0.0123612		0.251881	0.251882	0.252265	0.254724	0.262426	0.278746	0.285523	0.292879	0.30075	0.309076	0.336069
540.32	143	-0.0109851	-0.0109851	-0.0109943	-0.0111091	-0.0114452	-0.0121484	-0.0124438	-0.0127644	-0.0131074	-0.0134703	-0.0146567		-0.734305	-0.734305	-0.734922	-0.742593	-0.765258	-0.812071	-0.831813	-0.853244	-0.876173	-0.90043	-0.979735
538.91	144	-0.042689	-0.042689	-0.0427257	-0.043178	-0.0444973	-0.0472506	-0.0484056	-0.0496589	-0.0509993	-0.0524169	-0.0570496		-0.795513	-0.795514	-0.797427	-0.808673	-0.841422	-0.904223	-0.929853	-0.95737	-0.986541	-1.01716	-1.11604
537.8	145	-0.00151647	-0.00151647	-0.0015178	-0.00153403	-0.00158123	-0.00167959	-0.0017208	-0.00176555	-0.00181335	-0.00186391	-0.00202908		-0.0632404	-0.0632404	-0.0632996	-0.0639725	-0.0659408	-0.0700427	-0.0717615	-0.0736273	-0.075621	-0.0777291	-0.0846174
536.67	146	-0.0181304	-0.0181305	-0.0181465	-0.0183426	-0.0189109	-0.0200931	-0.0205885	-0.0211253	-0.0216991	-0.0223062	-0.0242879		-0.402014	-0.402014	-0.40237	-0.406717	-0.419319	-0.445167	-0.456517	-0.46842	-0.480749	-0.494605	-0.538544
536.19	147	-0.036906	-0.036906	-0.0369389	-0.0373396	-0.0384998	-0.0409114	-0.0419209	-0.0430162	-0.0441861	-0.0454229	-0.0494631		-1.35931	-1.35932	-1.36063	-1.37617	-1.42049	-1.50684	-1.54327	-1.58436	-1.62666	-1.67219	-1.82182
499.95	148	-0.0141151	-0.0141154	-0.0141366	-0.0143504	-0.0149108	-0.0160084	-0.0164565	-0.0169378	-0.0174481	-0.017984	-0.0197168		-0.0520643	-0.0523468	-0.0524921	-0.0534293	-0.0565823	-0.0614911	-0.063876	-0.0660677	-0.0683677	-0.0707616	-0.0780035
492.94	149	-0.0464173	-0.0464174	-0.0464946	-0.0472455	-0.0491737	-0.0529106	-0.0544277	-0.0560541	-0.0577761	-0.059582	-0.065406		-0.503979	-0.50398	-0.505059	-0.514709	-0.538335	-0.583881	-0.601744	-0.620802	-0.640902	-0.66191	-0.729312
492.82	150	-0.0155375	-0.0155375	-0.0155634	-0.0158153	-0.016462	-0.0177139	-0.0182222	-0.018767	-0.0193439	-0.0199489	-0.0218997		1.55462	1.55462	1.55704	1.58112	1.64345	1.76577	1.8156	1.86909	1.92578	1.98528	2.1779
491.99	151	-0.0156328	-0.0156328	-0.0156591	-0.0159141	-0.0165675	-0.017831	-0.0183438	-0.0188934	-0.0194753	-0.0200853	-0.0220523		2.3217	2.3217	2.32561	2.36348	2.46052	2.64817	2.72433	2.80596	2.89237	2.98297	3.27509
490.61	152	-0.0431053	-0.0431053	-0.0431796	-0.0438926	-0.0457112	-0.0492211	-0.0506441	-0.0521686	-0.0537819	-0.0554731	-0.0609234		-6.08061	-6.08062	-6.09209	-6.19881	-6.46634	-6.97738	-7.18364	-7.40425	-7.63739	-7.8815	-8.66574
442.85	153	-0.0310005	-0.031	-0.0311059	-0.0318986	-0.0336735	-0.0368503	-0.0380985	-0.0394192	-0.0408032	-0.0422422	-0.0468215		1.46959	1.4703	1.47497	1.51091	1.5917	1.73964	1.79674	1.85815	1.92257	1.9896	2.20429
440.91	154	-0.0260502	-0.0260503	-0.0261419	-0.0268201	-0.0283299	-0.0310258	-0.0320833	-0.0332018	-0.0343736	-0.0355914	-0.0394658		-3.39526	-3.39528	-3.40797	-3.49989	-3.7016	-4.06098	-4.20136	-4.34224	-4.49663	-4.65703	-5.16692
440.65	155	0.0018251	0.00182511	0.00183155	0.00187916	0.00198513	0.00217421	0.00224832	0.00232681	0.00240897	0.00249436	0.00276601		1.59375	1.59376	1.59938	1.64095	1.73349	1.8986	1.96332	2.03185	2.1036	2.17817	2.41538
440.03	156	-0.0356268	-0.0356262	-0.035753	-0.0366888	-0.0387651	-0.0424678	-0.0439185	-0.0454534	-0.0470622	-0.048733	-0.0540461		1.62005	1.62087	1.62579	1.66834	1.76276	1.93113	1.99709	2.06797	2.14005	2.21602	2.45762
438.73	157	-0.0183051	-0.0183052	-0.0183716	-0.0188578	-0.0199336	-0.0218482	-0.0225982	-0.023391	-0.0242212	-0.0250837	-0.0278262		-4.04875	-4.04878	-4.06396	-4.17375	-4.41521	-4.84343	-5.01093	-5.18788	-5.3731	-5.56546	-6.17674
410.7	158	-0.0178168	-0.0178171	-0.0179139	-0.0185245	-0.0197764	-0.021911	-0.0227322	-0.0235951	-0.0244938	-0.0254234	-0.0283595		0.872556	0.872567	0.876989	0.90562	0.965105	1.06781	1.10725	1.14873	1.19198	1.23674	1.37756
410.78	159	-0.0223908	-0.0223911	-0.0225124	-0.0232782	-0.0248494	-0.0275291	-0.0285601	-0.0296435	-0.0307721	-0.0319394	-0.0356264		1.07485	1.07486	1.08069	1.11745	1.19287	1.32221	1.37173	1.42377	1.47797	1.53403	1.71021
410.59	160	-0.0239185	-0.0239188	-0.0240488	-0.0248685	-0.0265492	-0.0294155	-0.0305179	-0.0316763	-0.0328829	-0.0341309	-0.0380716		-1.32751	-1.32753	-1.33474	-1.38023	-1.47352	-1.6326	-1.69378	-1.75808	-1.82504	-1.89431	-2.11303
409.66	161	-0.0141846	-0.0141848	-0.0142629	-0.0147528	-0.0157551	-0.0174622	-0.0181184	-0.0188079	-0.0195258	-0.0202683	-0.0226124		0.338183	0.338185	0.339543	0.349237	0.370278	0.407248	0.421643	0.436837	0.452232	0.46869	0.521466
409.57	162	-0.0117816	-0.0117818	-0.0118468	-0.0122546	-0.0130879	-0.0145073	-0.0150528	-0.015626	-0.0162228	-0.01684	-0.0187884		-1.3694	-1.36942	-1.37752	-1.42706	-1.52671	-1.69567	-1.76041	-1.82835	-1.89904	-1.97208	-2.20239
361.38	163	-0.0333503	-0.0333524	-0.03372	-0.0354987	-0.0386996	-0.0437864	-0.0456857	-0.0476606	-0.0496983	-0.051792	-0.0583282		-0.676313	-0.676354	-0.68381	-0.71988	-0.78479	-0.887946	-0.926462	-0.966512	-1.00649	-1.0717	-1.20938
360.58	164	-0.0125341	-0.0125349	-0.0126748	-0.0133486	-0.0145583	-0.0164784	-0.017195	-0.01794	-0.018709	-0.019498	-0.0219625		4.61736	4.61765	4.6692	4.9174	5.36303	6.071	6.335	6.60946	6.89209	7.18349	8.09143
360.34	165	-0.0208412	-0.0208426	-0.021076	-0.0221985	-0.0242127	-0.0274089	-0.0286015	-0.0298414	-0.0311213	-0.0324352	-0.0365364		-2.20612	-2.20626	-2.23097	-2.34979	-2.563	-2.90133	-3.02758	-3.15882	-3.2943	-3.43339	-3.86751
359.03	166	-0.0307292	-0.0307312	-0.0310819	-0.0327566	-0.0357514	-0.0404949	-0.0422635	-0.0441017	-0.0459988	-0.0479461	-0.0540207		-2.29703	-2.29721	-2.32649	-2.46078	-2.69619	-3.06509	-3.20202	-3.3441	-3.49055	-3.64194	-4.10833
347.04	167	-0.0263727	-0.0263751	-0.0267332	-0.0283342	-0.0311099	-0.0354334	-0.0370344	-0.0386943	-0.0404052	-0.0421573	-0.0476119		-0.381502	-0.381568	-0.38897	-0.4183	-0.466947	-0.537945	-0.564176	-0.59123	-0.62014	-0.648519	-0.735032
345.68	168	-0.012845	-0.0128462	-0.013024	-0.013813	-0.0151763	-0.0172964	-0.0180808	-0.0188939	-0.0197317	-0.0205895	-0.0232601		2.44653	2.44676	2.47995	2.62838	2.88526	3.28624	3.4347	3.58927	3.74728	3.90975	4.4157
345.71	169	-0.0165791	-0.0165807	-0.0168101	-0.017829	-0.0195881	-0.0223246	-0.023337	-0.0243871	-0.0254678	-0.026575	-0.0300219		-3.38053	-3.38124	-3.4286	-3.63796	-3.99863	-4.55907	-4.76631	-4.98123	-5.20238	-5.42894	-6.1341
267.56	170	-0.0229457	-0.0229665	-0.0239442	-0.0267648	-0.0307867	-0.0364624	-0.0384805	-0.0405434	-0.0426418	-0.044773	-0.0513107		-0.0594425	-0.0596273	-0.0652372	-0.078012	-0.0941976	-0.115635	-0.123054	-0.130567	-0.136561	-0.144132	-0.167122
268.03	171	-0.0229477	-0.0229683	-0.0239399	-0.0267498	-0.0307605	-0.0364232	-0.0384371	-0.0404958	-0.0425917	-0.0447189	-0.0512448		1.64175	1.64309	1.70931	1.90449	2.18525	2.58318	2.72491	2.86987	3.01752	3.16743	3.62756
267.58	172	-0.0189647	-0.018982	-0.01979	-0.0221213	-0.0254454	-0.0301364	-0.0318044	-0.0335094	-0.035245	-0.0370066	-0.0424102		-0.635665	-0.636242	-0.663327	-0.741466	-0.852885	-1.01012	-1.06603	-1.12318	-1.18135	-1.2404	-1.41998
267.64	173	-0.0210766	-0.0210957	-0.0219938	-0.0245846	-0.0282789	-0.0334924	-0.0353461	-0.0372409	-0.0391699	-0.0411275	-0.0471329		7.14181	7.14846	7.45657	8.34123	9.60016	11.3751	12.0059	12.6506	13.3069	13.9729	16.0156
266.41	174	-0.0301452	-0.0301734	-0.0314783	-0.0352202	-0.0405422	-0.0480434	-0.0507092	-0.0534336	-0.0562067	-0.0590208	-0.0676518		-8.83708	-8.84585	-9.23997	-10.3574	-11.9391	-14.1633	-14.953	-15.7598	-16.5808	-17.4137	-19.9657

## Sheet: HP_shielding_contributions
Normal mode contributions to shielding (left) and isotope shift (right).
For HP-isotope shift. Calculated at PBE0/pcSseg-1 level. Units: ppm for shielding, ppb for isotope shift.
						Shieldings													Isotope shifts
freq (1/cm)	Mode \ T (K)	0	50	100	150	200	260	280	300	320	340	400		0	50	100	150	200	260	280	300	320	340	400
1627.32	1	0.0217451	0.0217452	0.0217452	0.0217451	0.0217449	0.0217489	0.0217533	0.0217607	0.0217716	0.0217868	0.0218672		46.5428	46.5429	46.5431	46.5428	46.5424	46.5509	46.5605	46.576	46.5993	46.6321	46.804
1627.4	2	0.0211872	0.0211873	0.0211874	0.0211872	0.021187	0.0211909	0.0211952	0.0212024	0.021213	0.0212278	0.0213061		16.0298	16.0299	16.03	16.0298	16.0297	16.0327	16.0359	16.0413	16.0493	16.0606	16.1198
1627.25	3	0.0102535	0.0102535	0.0102535	0.0102535	0.0102534	0.0102552	0.0102574	0.0102608	0.010266	0.0102732	0.0103112		-21.6963	-21.6965	-21.6966	-21.6963	-21.6961	-21.7002	-21.7046	-21.7119	-21.7227	-21.738	-21.818
1625.81	4	-0.00100326	-0.00100327	-0.00100328	-0.00100326	-0.00100326	-0.00100344	-0.00100366	-0.001004	-0.0010045	-0.00100521	-0.00100894		-59.3066	-59.3069	-59.3069	-59.3066	-59.3061	-59.3171	-59.3296	-59.3495	-59.3793	-59.4214	-59.6412
1624.72	5	-0.00424582	-0.00424584	-0.00424587	-0.00424585	-0.00424581	-0.00424659	-0.00424749	-0.00424893	-0.00425108	-0.00425412	-0.00426994		13.207	13.207	13.2071	13.207	13.2069	13.2095	13.2122	13.2167	13.2235	13.2328	13.2821
1619.21	6	-0.00589022	-0.00589026	-0.00589029	-0.00589026	-0.00589018	-0.00589133	-0.00589262	-0.00589463	-0.00589768	-0.00590198	-0.00592437		0.684748	0.684752	0.684716	0.684712	0.684743	0.684875	0.684982	0.685255	0.685607	0.686115	0.688687
1619.37	7	0.00983472	0.00983478	0.00983478	0.00983472	0.00983464	0.00983657	0.00983871	0.00984208	0.00984717	0.00985435	0.00989173		0.761987	0.761992	0.761992	0.761987	0.761981	0.762187	0.762353	0.762557	0.762952	0.763565	0.766461
1619.13	8	0.00929749	0.00929755	0.00929755	0.0092975	0.00929743	0.00929925	0.00930122	0.00930446	0.00930927	0.00931608	0.00935144		-2.87364	-2.87366	-2.87374	-2.87372	-2.8737	-2.87426	-2.87486	-2.87586	-2.87734	-2.87944	-2.89033
1616.56	9	-0.012017	-0.012017	-0.012017	-0.012017	-0.012017	-0.0120194	-0.012022	-0.0120262	-0.0120326	-0.0120415	-0.0120877		-4.07569	-4.07572	-4.07567	-4.07564	-4.07569	-4.07653	-4.07745	-4.07892	-4.08116	-4.08423	-4.10013
1610.94	10	-0.0132402	-0.0132403	-0.0132403	-0.0132403	-0.0132403	-0.0132431	-0.0132462	-0.013251	-0.0132581	-0.0132681	-0.0133201		13.878	13.8781	13.8782	13.8781	13.8781	13.8811	13.8841	13.8891	13.8964	13.9068	13.9601
1572.94	11	-0.0061283	-0.00612834	-0.00612834	-0.0061283	-0.00612825	-0.00612983	-0.00613146	-0.00613404	-0.00613788	-0.00614317	-0.00617013		8.16015	8.16021	8.16021	8.16016	8.16019	8.16219	8.16446	8.16791	8.17293	8.17998	8.21602
1570.72	12	-0.0165215	-0.0165215	-0.0165216	-0.0165215	-0.0165215	-0.0165258	-0.0165302	-0.0165374	-0.0165477	-0.0165622	-0.0166355		-12.7044	-12.7044	-12.7045	-12.7044	-12.7044	-12.7078	-12.7112	-12.7167	-12.7247	-12.7358	-12.7923
1569.05	13	-0.0187192	-0.0187194	-0.0187195	-0.0187194	-0.0187192	-0.0187243	-0.0187295	-0.0187375	-0.0187494	-0.0187658	-0.0188495		5.24225	5.24229	5.24232	5.24229	5.2424	5.24377	5.24505	5.24742	5.25069	5.25522	5.27834
1547.82	14	-0.012397	-0.012397	-0.0123971	-0.012397	-0.012397	-0.0124009	-0.0124047	-0.0124107	-0.0124192	-0.0124311	-0.0124907		-5.86438	-5.86438	-5.86442	-5.86439	-5.8644	-5.86629	-5.8681	-5.87092	-5.87495	-5.88062	-5.90889
1548.37	15	-0.0212883	-0.0212884	-0.0212886	-0.0212883	-0.0212884	-0.0212949	-0.0213014	-0.0213116	-0.0213263	-0.0213466	-0.0214486		-9.8206	-9.82066	-9.82073	-9.82061	-9.82056	-9.82357	-9.8266	-9.83128	-9.83809	-9.84748	-9.89462
1546.05	16	-0.0279947	-0.0279949	-0.0279951	-0.0279949	-0.027995	-0.0280039	-0.0280126	-0.0280261	-0.0280458	-0.0280727	-0.028208		1.12913	1.12895	1.12895	1.12895	1.12894	1.12901	1.12927	1.12969	1.13013	1.13101	1.13557
1544.54	17	-0.0109346	-0.0109346	-0.0109346	-0.0109346	-0.0109347	-0.0109382	-0.0109416	-0.0109469	-0.0109546	-0.0109652	-0.0110185		13.621	13.6209	13.6211	13.621	13.6211	13.6256	13.6298	13.6365	13.6461	13.6591	13.7249
1510.79	18	0.0131657	0.0131658	0.0131658	0.0131657	0.0131658	0.0131708	0.0131756	0.013183	0.0131937	0.0132081	0.0132796		-4.91846	-4.91861	-4.91852	-4.91858	-4.91851	-4.92046	-4.92222	-4.92496	-4.92892	-4.93431	-4.96088
1477.26	19	-0.0112792	-0.0112792	-0.0112793	-0.0112792	-0.0112794	-0.0112849	-0.0112898	-0.0112971	-0.0113076	-0.0113217	-0.01139		-9.92151	-9.9215	-9.92157	-9.92152	-9.92171	-9.92649	-9.93078	-9.93726	-9.94651	-9.95883	-10.019
1477.08	20	-0.0195244	-0.0195245	-0.0195245	-0.0195244	-0.0195248	-0.019534	-0.0195425	-0.0195554	-0.0195735	-0.0195979	-0.0197161		-11.5293	-11.5294	-11.5294	-11.5293	-11.5295	-11.535	-11.54	-11.5476	-11.5583	-11.5728	-11.6426
1475.61	21	-0.00782981	-0.00782981	-0.00782986	-0.00782982	-0.00782998	-0.00783373	-0.0078372	-0.00784234	-0.00784966	-0.00785951	-0.00790719		9.37851	9.37863	9.37869	9.37864	9.37883	9.38324	9.38734	9.39343	9.40221	9.41377	9.47037
1475.52	22	-0.00736968	-0.00736973	-0.00736978	-0.00736974	-0.00736989	-0.00737342	-0.0073767	-0.00738154	-0.00738846	-0.00739768	-0.00744262		9.74996	9.75002	9.74997	9.74992	9.75023	9.75487	9.75906	9.76556	9.7746	9.78688	9.84594
1468.68	23	-0.00138054	-0.00138055	-0.00138056	-0.00138054	-0.00138056	-0.00138123	-0.00138184	-0.00138278	-0.00138409	-0.00138586	-0.00139442		0.647754	0.647758	0.647763	0.647768	0.647779	0.648078	0.64838	0.648805	0.649422	0.650262	0.65428
1468.45	24	0.000925645	0.000925652	0.000925658	0.000925653	0.000925668	0.000926117	0.000926529	0.000927155	0.000928038	0.000929227	0.000934973		-0.0383519	-0.0383522	-0.0383524	-0.0383522	-0.0383528	-0.0383701	-0.0383863	-0.0384127	-0.0384485	-0.0384967	-0.0387306
1467.34	25	-0.00369766	-0.00369769	-0.00369769	-0.00369767	-0.00369773	-0.00369954	-0.00370122	-0.0037037	-0.00370727	-0.00371201	-0.00373505		-10.498	-10.4981	-10.4981	-10.498	-10.4983	-10.5034	-10.5082	-10.5153	-10.5254	-10.5389	-10.6043
1464.71	26	0.0147631	0.0147632	0.0147632	0.0147631	0.0147635	0.0147708	0.0147776	0.0147877	0.014802	0.0148212	0.0149141		-10.4729	-10.473	-10.473	-10.4729	-10.4732	-10.4784	-10.4832	-10.4904	-10.5008	-10.5145	-10.5803
1465.11	27	-0.00805601	-0.00805607	-0.00805612	-0.00805608	-0.00805622	-0.00806026	-0.0080639	-0.00806944	-0.00807729	-0.00808777	-0.00813835		1.97073	1.97074	1.97075	1.97068	1.97078	1.97169	1.97265	1.974	1.97584	1.97839	1.99079
1464.49	28	0.0249827	0.0249828	0.024983	0.0249827	0.0249833	0.0249957	0.0250072	0.0250245	0.0250486	0.0250812	0.0252386		17.916	17.9161	17.9162	17.916	17.9164	17.9253	17.9336	17.946	17.9633	17.9866	18.0997
1462.54	29	0.0418688	0.0418691	0.0418691	0.0418689	0.0418702	0.0418916	0.041911	0.0419404	0.0419817	0.0420367	0.0423026		28.1978	28.1979	28.1979	28.1978	28.1988	28.2133	28.2264	28.2464	28.2744	28.3116	28.4916
1452.76	30	0.106141	0.106142	0.106142	0.106143	0.106146	0.106206	0.106259	0.106337	0.106447	0.106593	0.107292		-22.8591	-22.8592	-22.8594	-22.8585	-22.8599	-22.8706	-22.8811	-22.8957	-22.9163	-22.9441	-23.0793
1386.48	31	0.00853739	0.00853739	0.00853745	0.00853742	0.00853807	0.00854516	0.00855097	0.00855935	0.00857084	0.00858588	0.00865539		0.294052	0.294052	0.294054	0.294053	0.294075	0.294319	0.294519	0.294808	0.295204	0.295722	0.298055
1386.51	32	-0.0142559	-0.014256	-0.014256	-0.0142561	-0.0142571	-0.0142689	-0.0142785	-0.0142925	-0.0143118	-0.0143369	-0.0144529		6.21469	6.21473	6.21488	6.21475	6.21522	6.22033	6.22466	6.2308	6.2391	6.25002	6.3005
1386	33	-0.00457665	-0.00457668	-0.00457671	-0.0045767	-0.00457704	-0.00458082	-0.00458394	-0.00458848	-0.00459465	-0.00460272	-0.00464003		-0.458764	-0.458797	-0.4588	-0.458799	-0.458805	-0.459192	-0.45951	-0.460002	-0.46063	-0.461451	-0.465193
1384.25	34	0.000155475	0.000155477	0.000155477	0.000155477	0.000155489	0.000155619	0.000155726	0.000155881	0.000156092	0.000156367	0.000157641		-0.294582	-0.294584	-0.294587	-0.294585	-0.294611	-0.294856	-0.295059	-0.295353	-0.295753	-0.296277	-0.298692
1383.98	35	-0.0015305	-0.00153051	-0.00153051	-0.00153052	-0.00153064	-0.00153192	-0.00153297	-0.0015345	-0.00153658	-0.00153929	-0.00155186		-1.17037	-1.17038	-1.17038	-1.17039	-1.17047	-1.17145	-1.17226	-1.17343	-1.17502	-1.17709	-1.1867
1383.4	36	-0.010628	-0.010628	-0.010628	-0.010628	-0.0106289	-0.0106378	-0.0106451	-0.0106558	-0.0106703	-0.0106891	-0.0107765		-8.96658	-8.96658	-8.96664	-8.96661	-8.96737	-8.97489	-8.98108	-8.99008	-9.00229	-9.0182	-9.09194
1380.89	37	-0.019654	-0.0196541	-0.0196541	-0.0196542	-0.0196557	-0.0196724	-0.0196861	-0.019706	-0.0197331	-0.0197684	-0.0199314		6.19596	6.196	6.196	6.19602	6.19648	6.20169	6.20585	6.21172	6.22015	6.23077	6.28054
1378.48	38	-0.0226465	-0.0226465	-0.0226467	-0.0226468	-0.0226486	-0.0226682	-0.0226842	-0.0227074	-0.022739	-0.02278	-0.0229693		2.65829	2.65847	2.65831	2.65832	2.65849	2.66051	2.66219	2.66465	2.66784	2.67226	2.69306
1346.03	39	-0.0129932	-0.0129933	-0.0129933	-0.0129933	-0.0129946	-0.0130077	-0.0130183	-0.0130334	-0.0130538	-0.0130802	-0.0131999		-1.24572	-1.24573	-1.24573	-1.24574	-1.24586	-1.24712	-1.24813	-1.24958	-1.25153	-1.25406	-1.26546
1345.16	40	-0.00145678	-0.00145679	-0.00145679	-0.0014568	-0.00145694	-0.00145842	-0.00145961	-0.00146131	-0.00146361	-0.00146657	-0.00148005		14.1954	14.1955	14.1955	14.1954	14.1969	14.2113	14.2228	14.2392	14.2615	14.2903	14.4211
1345.08	41	-0.015874	-0.0158741	-0.0158741	-0.0158742	-0.0158757	-0.0158919	-0.0159048	-0.0159233	-0.0159483	-0.0159806	-0.0161273		-9.44022	-9.44029	-9.44025	-9.44034	-9.44127	-9.45081	-9.4585	-9.46958	-9.48444	-9.50356	-9.59077
1344.26	42	-0.00944593	-0.00944593	-0.009446	-0.00944598	-0.00944692	-0.00945656	-0.00946436	-0.00947536	-0.00949028	-0.00950959	-0.00959708		-4.14049	-4.14045	-4.14052	-4.14048	-4.14089	-4.14514	-4.14862	-4.15343	-4.15999	-4.16853	-4.20693
1340.84	43	-0.0138798	-0.0138799	-0.0138799	-0.0138799	-0.0138814	-0.0138959	-0.0139074	-0.0139238	-0.0139461	-0.0139748	-0.0141047		3.37754	3.37757	3.37757	3.37756	3.37792	3.38139	3.38415	3.38822	3.39355	3.40032	3.43139
1341.36	44	-0.0154451	-0.0154451	-0.0154452	-0.0154452	-0.0154469	-0.015463	-0.0154758	-0.0154941	-0.0155188	-0.0155506	-0.0156948		1.3839	1.3839	1.38392	1.38391	1.38406	1.38551	1.38665	1.3883	1.39038	1.39336	1.40628
1337.88	45	0.0019219	0.00192192	0.00192192	0.00192193	0.00192214	0.00192419	0.00192582	0.00192812	0.00193125	0.00193525	0.00195343		-2.3305	-2.33049	-2.33052	-2.3305	-2.33075	-2.33321	-2.33513	-2.33791	-2.34162	-2.34641	-2.36817
1337.12	46	-0.00898809	-0.00898816	-0.00898816	-0.00898814	-0.00898915	-0.00899875	-0.00900642	-0.00901721	-0.0090318	-0.00905065	-0.00913588		1.39662	1.39663	1.39663	1.3967	1.39684	1.3982	1.39922	1.40086	1.40299	1.40574	1.41817
1313.78	47	-0.00747514	-0.00747514	-0.00747519	-0.00747519	-0.00747625	-0.00748538	-0.00749248	-0.0075025	-0.00751586	-0.00753293	-0.00760933		2.52894	2.52902	2.52896	2.52903	2.52932	2.53252	2.53494	2.53828	2.54283	2.54871	2.5747
1310.58	48	-0.0281672	-0.0281674	-0.0281674	-0.0281676	-0.0281715	-0.0282067	-0.0282338	-0.0282721	-0.0283232	-0.0283882	-0.0286793		-4.97049	-4.97053	-4.97053	-4.97057	-4.97131	-4.97781	-4.9828	-4.98999	-4.99946	-5.01119	-5.06405
1310.91	49	-0.0100837	-0.0100838	-0.0100838	-0.0100839	-0.0100853	-0.0100978	-0.0101075	-0.0101211	-0.0101394	-0.0101627	-0.0102667		0.904432	0.904439	0.904439	0.904445	0.904638	0.905586	0.906392	0.907616	0.909149	0.911037	0.919982
1290.73	50	-0.0114788	-0.0114788	-0.0114789	-0.0114789	-0.0114808	-0.0114966	-0.0115087	-0.0115255	-0.0115479	-0.0115765	-0.0117027		-1.59225	-1.59226	-1.59228	-1.59228	-1.59254	-1.59484	-1.59657	-1.59895	-1.60204	-1.60604	-1.62377
1291.24	51	0.00209659	0.00209659	0.00209661	0.00209661	0.00209695	0.00209981	0.002102	0.00210508	0.00210916	0.00211435	0.00213737		17.5753	17.5754	17.5755	17.5756	17.5783	17.6024	17.6209	17.6467	17.6809	17.7246	17.9178
1290.07	52	-0.00799885	-0.00799891	-0.00799898	-0.00799898	-0.00800022	-0.00801125	-0.00801971	-0.0080315	-0.0080471	-0.008067	-0.00815513		-8.34971	-8.34977	-8.34984	-8.34984	-8.35114	-8.36264	-8.37147	-8.38378	-8.40006	-8.42083	-8.5128
1289.78	53	-0.00713121	-0.00713126	-0.00713126	-0.00713132	-0.00713243	-0.00714233	-0.00714982	-0.00716034	-0.00717432	-0.00719207	-0.00727081		-4.26029	-4.26033	-4.26033	-4.26036	-4.261	-4.26695	-4.27141	-4.2777	-4.28606	-4.29666	-4.34374
1285.71	54	-0.0102197	-0.0102198	-0.0102198	-0.0102199	-0.0102216	-0.0102361	-0.010247	-0.0102625	-0.0102828	-0.0103086	-0.0104229		-3.52911	-3.52914	-3.52917	-3.52917	-3.52979	-3.53498	-3.5388	-3.54429	-3.55145	-3.56053	-3.60065
1252.92	55	-0.0138412	-0.0138412	-0.0138413	-0.0138414	-0.0138444	-0.0138678	-0.013885	-0.0139088	-0.0139401	-0.0139793	-0.0141503		5.10793	5.10808	5.10797	5.10814	5.10922	5.11775	5.12403	5.13273	5.14417	5.15852	5.22146
1254.52	56	0.00150786	0.00150787	0.00150787	0.00150789	0.00150821	0.00151074	0.0015126	0.00151518	0.00151856	0.00152282	0.00154135		-0.948057	-0.948064	-0.948064	-0.948076	-0.948277	-0.949868	-0.951039	-0.95266	-0.954803	-0.957463	-0.969114
1254.35	57	-0.00467771	-0.00467771	-0.00467775	-0.00467777	-0.00467877	-0.00468662	-0.00469245	-0.00470041	-0.00471094	-0.00472417	-0.00478166		1.67802	1.67802	1.67803	1.67804	1.67839	1.68119	1.68321	1.6861	1.6898	1.69452	1.71508
1253	58	-0.0121679	-0.0121679	-0.012168	-0.0121681	-0.0121708	-0.0121913	-0.0122065	-0.0122275	-0.0122549	-0.0122894	-0.0124397		-4.4433	-4.4433	-4.44333	-4.44335	-4.44435	-4.45189	-4.4575	-4.46519	-4.4752	-4.48789	-4.54289
1250.32	59	-0.0302585	-0.0302588	-0.0302588	-0.0302592	-0.030266	-0.0303179	-0.0303563	-0.0304089	-0.030478	-0.0305649	-0.0309419		-4.57571	-4.57595	-4.57575	-4.57602	-4.57717	-4.58564	-4.59182	-4.60027	-4.61152	-4.62534	-4.68498
1226.18	60	-0.00588448	-0.00588452	-0.00588457	-0.00588462	-0.00588617	-0.00589765	-0.00590596	-0.00591734	-0.00593208	-0.00595049	-0.00602976		9.44403	9.44398	9.44406	9.44413	9.44662	9.46521	9.47858	9.49673	9.52043	9.55014	9.6775
1224.02	61	-0.0222098	-0.0222098	-0.02221	-0.0222102	-0.0222163	-0.0222602	-0.0222919	-0.022335	-0.0223911	-0.0224613	-0.0227621		-11.1187	-11.1186	-11.1187	-11.1188	-11.122	-11.1441	-11.1601	-11.1817	-11.21	-11.2454	-11.3967
1223.91	62	-0.0181674	-0.0181676	-0.0181676	-0.0181679	-0.0181727	-0.0182087	-0.0182347	-0.0182701	-0.018316	-0.0183736	-0.0186199		1.42344	1.42345	1.42345	1.42347	1.42381	1.42641	1.4283	1.4309	1.43429	1.43836	1.45673
1211.62	63	-0.00813346	-0.00813353	-0.0081336	-0.00813367	-0.00813606	-0.00815313	-0.00816534	-0.00818197	-0.00820351	-0.00823037	-0.00834506		1.29038	1.29039	1.29033	1.29042	1.29069	1.29329	1.29523	1.29778	1.3011	1.30524	1.32278
1211.76	64	-0.0128625	-0.0128626	-0.0128627	-0.0128628	-0.0128665	-0.0128936	-0.0129129	-0.0129393	-0.0129733	-0.0130157	-0.0131968		-0.300682	-0.300685	-0.300687	-0.300691	-0.300782	-0.301551	-0.301917	-0.302662	-0.303379	-0.304405	-0.308759
1208.77	65	0.0262665	0.0262665	0.0262667	0.0262672	0.0262751	0.0263313	0.0263714	0.026426	0.0264963	0.0265845	0.0269581		-1.84152	-1.84175	-1.84177	-1.84156	-1.84221	-1.84545	-1.84784	-1.85091	-1.85544	-1.86034	-1.88413
1133.67	66	-0.014278	-0.0142782	-0.0142782	-0.0142787	-0.0142861	-0.0143316	-0.0143621	-0.0144024	-0.0144532	-0.0145154	-0.0147709		11.7544	11.7543	11.7543	11.7547	11.7611	11.7988	11.8239	11.8575	11.8996	11.9507	12.1623
1132.24	67	-0.0230898	-0.0230898	-0.02309	-0.0230907	-0.0231028	-0.0231771	-0.0232267	-0.0232922	-0.023375	-0.0234759	-0.0238908		-10.1181	-10.1181	-10.1182	-10.1185	-10.1238	-10.1569	-10.1788	-10.2078	-10.2445	-10.2891	-10.4723
1132.9	68	-0.0162874	-0.0162874	-0.0162876	-0.016288	-0.0162967	-0.0163488	-0.0163838	-0.0164299	-0.016488	-0.016559	-0.0168511		-9.27701	-9.27701	-9.27709	-9.27736	-9.28232	-9.31215	-9.33218	-9.35855	-9.39173	-9.4323	-9.59914
1132.82	69	-0.0157686	-0.0157687	-0.0157688	-0.0157694	-0.0157777	-0.0158282	-0.0158621	-0.0159067	-0.0159631	-0.0160318	-0.016315		6.72444	6.7243	6.7245	6.72456	6.72811	6.74953	6.76394	6.78292	6.80692	6.83614	6.95663
1131.4	70	-0.0123744	-0.0123745	-0.0123745	-0.012375	-0.0123815	-0.0124216	-0.0124483	-0.0124836	-0.0125281	-0.0125823	-0.0128053		1.3015	1.30151	1.30151	1.30143	1.30219	1.30608	1.30878	1.31235	1.31687	1.32238	1.34516
1104.56	71	-0.0213303	-0.0213305	-0.0213305	-0.0213315	-0.021345	-0.021424	-0.0214758	-0.0215436	-0.0216286	-0.0217313	-0.022149		-2.36821	-2.36823	-2.36823	-2.36835	-2.36984	-2.37861	-2.38419	-2.39172	-2.40133	-2.41256	-2.45834
1104.61	72	-0.0167251	-0.0167252	-0.0167252	-0.016726	-0.0167366	-0.0167985	-0.0168392	-0.0168923	-0.016959	-0.0170395	-0.017367		0.842299	0.842306	0.842466	0.842348	0.843039	0.846159	0.848206	0.850884	0.85424	0.858297	0.875337
1103	73	-0.0117482	-0.0117482	-0.0117484	-0.0117488	-0.0117564	-0.0118003	-0.011829	-0.0118666	-0.0119137	-0.0119706	-0.0122022		4.75091	4.75106	4.75095	4.75129	4.7541	4.77134	4.78284	4.7977	4.81621	4.83878	4.9304
1099.8	74	0.0163965	0.0163965	0.0163967	0.0163975	0.0164084	0.0164708	0.0165117	0.016565	0.0166315	0.016712	0.0170384		-4.11352	-4.1137	-4.11356	-4.11375	-4.11628	-4.13114	-4.14094	-4.1536	-4.16967	-4.18916	-4.26837
986.94	75	-0.0128888	-0.0128889	-0.0128889	-0.0128909	-0.0129099	-0.0129983	-0.013051	-0.013117	-0.0131967	-0.0132901	-0.013651		4.38732	4.38719	4.3872	4.38786	4.39426	4.42407	4.44204	4.46436	4.49131	4.52292	4.64533
989.41	76	-0.00997159	-0.00997159	-0.0099717	-0.0099731	-0.00998767	-0.0100551	-0.0100955	-0.010146	-0.0102071	-0.0102789	-0.0105561		-0.0479	-0.0479	-0.0479006	-0.0479104	-0.0481031	-0.0484029	-0.048737	-0.0489225	-0.0492656	-0.0496647	-0.0511802
988.11	77	-0.0132518	-0.0132518	-0.013252	-0.0132538	-0.0132734	-0.0133636	-0.0134176	-0.0134852	-0.0135668	-0.0136625	-0.0140324		-2.82354	-2.82354	-2.82358	-2.824	-2.82843	-2.84812	-2.85991	-2.87474	-2.8925	-2.91318	-2.99334
987.96	78	-0.0180463	-0.0180465	-0.0180465	-0.0180492	-0.0180757	-0.0181987	-0.0182723	-0.0183641	-0.0184754	-0.0186058	-0.0191105		-0.850517	-0.850699	-0.850526	-0.850835	-0.851901	-0.8577	-0.861343	-0.865496	-0.87092	-0.876884	-0.901681
982.68	79	-0.0253821	-0.0253824	-0.0253824	-0.0253862	-0.0254251	-0.0256029	-0.0257087	-0.025841	-0.0260006	-0.0261883	-0.0269095		-15.5683	-15.5686	-15.5685	-15.5709	-15.5948	-15.7041	-15.7691	-15.8504	-15.9484	-16.064	-16.5065
982.17	80	-0.0113137	-0.0113137	-0.0113138	-0.0113155	-0.0113329	-0.0114125	-0.0114598	-0.0115189	-0.0115902	-0.0116739	-0.0119959		15.4291	15.4294	15.4293	15.4319	15.4552	15.5632	15.6276	15.7079	15.8049	15.9184	16.3565
982.07	81	-0.00190311	-0.00190313	-0.00190313	-0.00190344	-0.00190636	-0.00191974	-0.0019277	-0.00193765	-0.00194965	-0.00196369	-0.00201795		-0.624503	-0.624509	-0.62451	-0.624613	-0.625604	-0.630043	-0.632685	-0.635983	-0.63996	-0.644575	-0.662563
967.92	82	-0.00968977	-0.00968977	-0.00968979	-0.00969157	-0.00970813	-0.00978167	-0.0098248	-0.0098784	-0.00994271	-0.0100178	-0.010305		-0.182317	-0.182219	-0.182219	-0.182264	-0.182747	-0.184375	-0.185308	-0.186455	-0.187719	-0.189297	-0.195261
769.31	83	-0.0980903	-0.0980903	-0.0980933	-0.0982128	-0.098867	-0.100907	-0.101928	-0.103114	-0.104461	-0.105956	-0.111242		26.8005	26.8005	26.8025	26.8638	27.152	27.9567	28.3374	28.7739	29.2581	29.7857	31.6077
844.7	84	-0.0148312	-0.0148312	-0.0148313	-0.0148401	-0.0148994	-0.0151103	-0.0152225	-0.0153564	-0.0155112	-0.0156863	-0.0163238		0.751314	0.751314	0.751322	0.751769	0.75477	0.765642	0.771326	0.77792	0.785762	0.794635	0.827131
843.35	85	-0.0116046	-0.0116046	-0.0116047	-0.0116117	-0.0116583	-0.0118246	-0.0119128	-0.012018	-0.0121397	-0.0122775	-0.0127783		0.008823	0.008823	0.00882075	0.00873899	0.00849252	0.00751583	0.00708973	0.00662802	0.00613896	0.00548424	0.00500671
759.52	86	-0.104932	-0.104932	-0.104936	-0.105076	-0.105823	-0.108113	-0.109251	-0.11057	-0.112061	-0.113715	-0.119535		-20.799	-20.799	-20.8005	-20.8478	-21.0727	-21.7019	-22.0017	-22.3428	-22.7236	-23.1386	-24.5653
803.07	87	-0.00535985	-0.00535985	-0.00535995	-0.00536469	-0.00539316	-0.0054873	-0.0055357	-0.00559259	-0.00565769	-0.00573061	-0.00599179		0.959131	0.959131	0.95915	0.959998	0.965092	0.981858	0.990517	1.0007	1.01243	1.02548	1.07221
802.73	88	-0.0129961	-0.0129961	-0.0129963	-0.0130079	-0.013077	-0.0133053	-0.0134228	-0.013561	-0.013719	-0.0138968	-0.0145309		-0.696794	-0.696794	-0.696809	-0.697449	-0.701252	-0.713734	-0.720135	-0.727658	-0.736247	-0.746723	-0.781511
800.71	89	-0.011883	-0.0118832	-0.0118834	-0.0118942	-0.0119582	-0.0121694	-0.0122778	-0.0124051	-0.0125507	-0.0127139	-0.0132972		0.266239	0.26609	0.266092	0.266218	0.267316	0.270706	0.27262	0.274915	0.277745	0.28062	0.291721
793.08	90	-0.0085124	-0.0085124	-0.00851259	-0.00852085	-0.0085691	-0.00872599	-0.00880602	-0.00889992	-0.00900707	-0.00912692	-0.00955429		1.44756	1.44756	1.44759	1.44904	1.45729	1.4845	1.49828	1.51444	1.53286	1.55345	1.62678
792.47	91	-0.0133216	-0.0133216	-0.0133219	-0.0133349	-0.0134107	-0.0136571	-0.0137827	-0.01393	-0.0140981	-0.0142859	-0.0149562		-1.1401	-1.1401	-1.14013	-1.14132	-1.14812	-1.16995	-1.18102	-1.19397	-1.20872	-1.22501	-1.28375
791.17	92	-0.0139877	-0.0139879	-0.0139882	-0.0140021	-0.0140822	-0.0143428	-0.0144754	-0.0146309	-0.0148082	-0.0150065	-0.015713		0.533952	0.533775	0.533781	0.534131	0.53663	0.544607	0.549092	0.554201	0.560096	0.566553	0.590621
791.42	93	-0.0147991	-0.0147993	-0.0147997	-0.0148143	-0.0148992	-0.0151743	-0.0153147	-0.0154791	-0.0156667	-0.0158762	-0.0166233		-0.829581	-0.829768	-0.829614	-0.830724	-0.835962	-0.852353	-0.860711	-0.870455	-0.881723	-0.893862	-0.93616
784.15	94	-0.024918	-0.024918	-0.0249189	-0.0249449	-0.0250951	-0.0255759	-0.0258193	-0.0261039	-0.026428	-0.0267896	-0.0280749		-4.28116	-4.28116	-4.2816	-4.28631	-4.31413	-4.4018	-4.44538	-4.4965	-4.5545	-4.61908	-4.84758
762.31	95	-0.0159289	-0.0159291	-0.0159297	-0.0159504	-0.0160618	-0.0164051	-0.0165759	-0.0167739	-0.0169984	-0.0172471	-0.0181242		-1.13006	-1.13027	-1.13031	-1.13183	-1.13989	-1.16459	-1.17686	-1.19086	-1.20716	-1.22498	-1.28775
762.71	96	-0.00951965	-0.00951965	-0.00951998	-0.00953233	-0.00959884	-0.00980342	-0.00990533	-0.0100236	-0.0101574	-0.0103058	-0.0108293		0.177579	0.177706	0.177713	0.177943	0.179057	0.183004	0.184906	0.186979	0.189611	0.192382	0.202153
761.87	97	-0.0139161	-0.0139161	-0.0139166	-0.0139348	-0.0140326	-0.0143332	-0.0144825	-0.0146559	-0.0148521	-0.01507	-0.0158372		0.87381	0.874004	0.874026	0.874969	0.880147	0.897274	0.906122	0.916231	0.927731	0.940347	0.985843
759.83	98	-0.0148479	-0.0148479	-0.0148484	-0.0148682	-0.014974	-0.0152977	-0.0154585	-0.015645	-0.0158558	-0.0160898	-0.0169133		-0.605013	-0.605013	-0.605044	-0.606085	-0.611295	-0.626519	-0.633925	-0.642435	-0.651984	-0.662715	-0.699181
712.87	99	-0.0522449	-0.0522449	-0.0522486	-0.0523571	-0.052868	-0.0543081	-0.054997	-0.0557838	-0.0566623	-0.0576259	-0.0609613		24.8224	24.8224	24.8242	24.8754	25.117	25.7978	26.1242	26.497	26.9133	27.3701	28.9515
715.06	100	-0.0215278	-0.0215278	-0.0215293	-0.0215731	-0.0217805	-0.0223672	-0.0226488	-0.0229702	-0.0233294	-0.0237235	-0.0250889		0.638937	0.638937	0.638971	0.640085	0.645612	0.662034	0.66954	0.678521	0.688598	0.699697	0.738367
715.83	101	-0.020302	-0.020302	-0.0203031	-0.0203444	-0.0205388	-0.0210897	-0.021354	-0.0216561	-0.0219941	-0.0223647	-0.0236489		-0.0322141	-0.0322141	-0.0319326	-0.0322812	-0.0325898	-0.0334639	-0.0338833	-0.0340606	-0.0348989	-0.0354869	-0.0375247
714.79	102	-0.0191589	-0.0191589	-0.0191602	-0.0191993	-0.0193844	-0.0199071	-0.0201577	-0.020444	-0.0207642	-0.0211152	-0.0223311		1.29526	1.29526	1.29534	1.29772	1.30907	1.34259	1.35909	1.37767	1.3982	1.4211	1.50072
713.19	103	-0.0151042	-0.0151042	-0.0151053	-0.0151365	-0.0152838	-0.015699	-0.015898	-0.0161262	-0.01638	-0.0166583	-0.017622		0.0273094	0.0273094	0.0273113	0.0273678	0.027634	0.0286052	0.0287446	0.0280439	0.0283025	0.0285999	0.0297056
710.49	104	-0.0265926	-0.0265926	-0.0265945	-0.026651	-0.0269153	-0.0276571	-0.0280114	-0.0284156	-0.0288666	-0.0293611	-0.0310708		-5.51458	-5.51458	-5.51501	-5.52719	-5.58353	-5.74055	-5.81529	-5.90047	-5.99541	-6.09939	-6.45804
710.64	105	-0.0294401	-0.0294397	-0.0294419	-0.0295043	-0.0297968	-0.0306168	-0.0310086	-0.0314557	-0.0319546	-0.0325016	-0.0343936		0.551128	0.551542	0.551153	0.552613	0.557229	0.571671	0.578641	0.586626	0.595566	0.605394	0.639541
708.68	106	-0.00687291	-0.00687291	-0.00687343	-0.00688828	-0.00695748	-0.00715079	-0.00724301	-0.00734819	-0.0074655	-0.00759405	-0.00803826		-0.464065	-0.464065	-0.464099	-0.465102	-0.469867	-0.482827	-0.489054	-0.496156	-0.504077	-0.512756	-0.54275
705.05	107	-0.0233436	-0.0233436	-0.0233455	-0.0233977	-0.0236384	-0.0243075	-0.0246256	-0.0249881	-0.0253919	-0.025834	-0.0273598		-4.44758	-4.44758	-4.44795	-4.45834	-4.50563	-4.63632	-4.69811	-4.76841	-4.84663	-4.93219	-5.22698
704.97	108	-0.0065556	-0.0065556	-0.00655611	-0.00657078	-0.00663837	-0.00682628	-0.00691562	-0.0070174	-0.0071308	-0.00725497	-0.00768345		1.46147	1.46147	1.46159	1.46486	1.47993	1.52182	1.54174	1.56443	1.58971	1.61739	1.71291
705.09	109	-4.81947e-05	-4.81947e-05	-4.81985e-05	-4.83061e-05	-4.8803e-05	-5.01823e-05	-5.08385e-05	-5.15861e-05	-5.24191e-05	-5.33312e-05	-5.64792e-05		-0.353445	-0.353445	-0.353473	-0.354264	-0.357908	-0.368032	-0.372853	-0.37834	-0.384453	-0.391142	-0.414246
704.91	110	-0.0260318	-0.0260318	-0.0260338	-0.0260921	-0.0263605	-0.0271067	-0.0274614	-0.0278656	-0.0283159	-0.0288089	-0.0305104		-0.298004	-0.298004	-0.298033	-0.29882	-0.302282	-0.311625	-0.316006	-0.32097	-0.326476	-0.33248	-0.353067
702.82	111	-0.0109916	-0.0109916	-0.0109925	-0.0110177	-0.0111327	-0.0114512	-0.0116023	-0.0117744	-0.0119661	-0.0121758	-0.0128992		0.0322336	0.0322336	0.0320793	0.0323099	0.0326471	0.0335811	0.0340245	0.0345291	0.0350911	0.0357062	0.0376434
700.69	112	-0.0228422	-0.0228422	-0.0228438	-0.0228973	-0.0231395	-0.0238079	-0.0241247	-0.024485	-0.0248861	-0.0253249	-0.0268371		-0.323219	-0.323219	-0.322932	-0.324227	-0.328355	-0.339241	-0.344293	-0.349648	-0.35594	-0.36278	-0.386501
700.82	113	-0.00696616	-0.00696616	-0.00696664	-0.00698296	-0.00705682	-0.00726066	-0.00735725	-0.00746716	-0.00758959	-0.00772339	-0.00818446		0.178708	0.178708	0.178822	0.179139	0.181137	0.186369	0.188849	0.19167	0.194701	0.198134	0.210082
700.3	114	-0.0478935	-0.0478935	-0.0478976	-0.0480095	-0.0485195	-0.049924	-0.0505893	-0.0513462	-0.0521885	-0.0531098	-0.0562847		-5.32721	-5.32721	-5.32767	-5.34033	-5.39834	-5.55593	-5.63048	-5.7146	-5.80888	-5.91196	-6.26768
676.77	115	-0.013942	-0.013942	-0.0139437	-0.0139844	-0.0141578	-0.0146167	-0.0148302	-0.0150713	-0.0153381	-0.0156283	-0.01662		-0.0906445	-0.0906445	-0.0906603	-0.0910081	-0.0923882	-0.0958637	-0.0974449	-0.0992147	-0.101157	-0.103257	-0.110356
674.73	116	-0.0212029	-0.0212029	-0.0212055	-0.0212686	-0.0215364	-0.0222417	-0.0225694	-0.0229393	-0.0233481	-0.0237924	-0.0253109		-0.982081	-0.982081	-0.982216	-0.985388	-0.998535	-1.03266	-1.0484	-1.06613	-1.08568	-1.10688	-1.17913
674.87	117	-0.0190669	-0.0190669	-0.0190692	-0.0191259	-0.0193663	-0.0199999	-0.0202943	-0.0206266	-0.020994	-0.0213932	-0.0227579		-0.623751	-0.623751	-0.623827	-0.62568	-0.633544	-0.654272	-0.663904	-0.674775	-0.687093	-0.699853	-0.744496
674.61	118	-0.0179829	-0.0179829	-0.0179851	-0.0180386	-0.0182657	-0.0188639	-0.0191418	-0.0194555	-0.0198023	-0.0201794	-0.021467		-0.522583	-0.522583	-0.522647	-0.524203	-0.530801	-0.548186	-0.556263	-0.565378	-0.575455	-0.586414	-0.623832
673.01	119	-0.0181266	-0.0181266	-0.0181289	-0.0181838	-0.0184153	-0.0190236	-0.0193058	-0.0196241	-0.0199758	-0.0203582	-0.021663		0.995416	0.995416	0.995503	0.997922	1.00886	1.0388	1.05295	1.06902	1.08688	1.10607	1.17028
619.43	120	-0.0840081	-0.0840068	-0.0840294	-0.0844498	-0.0859823	-0.0896485	-0.0912804	-0.0930918	-0.0950666	-0.097189	-0.1043		-0.216683	-0.215327	-0.215456	-0.217394	-0.223534	-0.236845	-0.242499	-0.24866	-0.255269	-0.262276	-0.285242
601.48	121	-0.0337097	-0.0337097	-0.0337214	-0.0339206	-0.0346134	-0.03622	-0.0369258	-0.0377045	-0.0385498	-0.0394548	-0.0424702		14.5256	14.5256	14.5299	14.6165	14.913	15.6028	15.9052	16.2407	16.6039	16.993	18.2884
601.47	122	-0.0168739	-0.0168739	-0.0168798	-0.0169798	-0.0173263	-0.0181305	-0.0184838	-0.0188736	-0.0192971	-0.0197501	-0.0212592		3.32359	3.32359	3.32446	3.3447	3.41356	3.57299	3.64296	3.72013	3.80355	3.89317	4.19201
601.33	123	-0.0427975	-0.0427968	-0.0428117	-0.0430651	-0.0439448	-0.0459845	-0.0468798	-0.0478693	-0.0489424	-0.0500915	-0.0539197		-16.0378	-16.0375	-16.0431	-16.1384	-16.4689	-17.2346	-17.5676	-17.9384	-18.3405	-18.7711	-20.2119
592.71	124	-0.011715	-0.0117152	-0.0117198	-0.0117949	-0.012049	-0.0126302	-0.0128841	-0.0131637	-0.0134666	-0.0137903	-0.0148667		-0.634397	-0.634595	-0.634846	-0.639075	-0.653187	-0.685256	-0.699223	-0.714592	-0.731223	-0.748987	-0.807978
592.72	125	-0.0130143	-0.0130143	-0.0130194	-0.0131029	-0.0133852	-0.0140308	-0.0143128	-0.0146235	-0.0149599	-0.0153195	-0.0165156		1.29614	1.29638	1.29689	1.30521	1.33333	1.39764	1.42573	1.45667	1.49019	1.52601	1.64484
591.53	126	-0.0205086	-0.0205086	-0.0205172	-0.02065	-0.0210991	-0.0221231	-0.0225699	-0.0230618	-0.0235946	-0.0241642	-0.0260563		-0.597359	-0.597359	-0.598022	-0.602345	-0.617652	-0.650311	-0.664498	-0.680031	-0.696767	-0.714988	-0.773407
577.36	127	-0.0288987	-0.0288987	-0.028913	-0.0291269	-0.0298207	-0.0313666	-0.0320337	-0.0327652	-0.0335547	-0.034396	-0.0371778		-0.738095	-0.738095	-0.738503	-0.744391	-0.763586	-0.804699	-0.822334	-0.84163	-0.862414	-0.884526	-0.956828
575.32	128	-0.0274064	-0.0274064	-0.0274204	-0.0276274	-0.0282949	-0.0297772	-0.0304156	-0.0311152	-0.0318699	-0.0326738	-0.0353299		-1.08792	-1.08792	-1.08843	-1.09624	-1.12182	-1.17914	-1.20393	-1.23114	-1.26052	-1.29186	-1.39557
577.18	129	-0.0156608	-0.0156608	-0.0156686	-0.0157847	-0.0161612	-0.0169996	-0.0173614	-0.0177582	-0.0181864	-0.0186426	-0.0201515		0.802061	0.802346	0.802743	0.808694	0.82769	0.870936	0.889473	0.909478	0.931407	0.954774	1.03242
576.21	130	-0.0181641	-0.0181641	-0.0181732	-0.0183093	-0.0187489	-0.0197268	-0.0201483	-0.0206104	-0.0211087	-0.0216398	-0.0233961		1.77222	1.77222	1.77295	1.78471	1.8245	1.91385	1.9529	1.99586	2.04272	2.09238	2.25683
575.79	131	-0.00956081	-0.00956081	-0.00956565	-0.00963757	-0.00986928	-0.0103844	-0.0106065	-0.0108499	-0.0111125	-0.0113923	-0.0123172		-0.279444	-0.279283	-0.279454	-0.28184	-0.28894	-0.304352	-0.311213	-0.318527	-0.326405	-0.334785	-0.362425
572.63	132	-0.0203547	-0.0203547	-0.0203654	-0.020523	-0.0210274	-0.022142	-0.0226213	-0.0231462	-0.023712	-0.0243144	-0.0263031		0.352442	0.352442	0.352594	0.354995	0.362993	0.381087	0.388945	0.397174	0.406507	0.41647	0.449967
571.11	133	-0.021103	-0.021103	-0.0211144	-0.0212801	-0.0218083	-0.0229726	-0.0234726	-0.0240201	-0.0246099	-0.0252377	-0.0273094		3.5334	3.5334	3.53523	3.56219	3.64886	3.84091	3.92358	4.01367	4.11134	4.21535	4.55946
569.42	134	-0.0246468	-0.0246464	-0.0246601	-0.0248568	-0.0254813	-0.0268527	-0.0274409	-0.0280841	-0.0287773	-0.0295149	-0.0319415		-5.33775	-5.33732	-5.34041	-5.38427	-5.52265	-5.82422	-5.95327	-6.09387	-6.24571	-6.40716	-6.93264
564.37	135	-0.0253491	-0.0253491	-0.0253642	-0.0255762	-0.02624	-0.027686	-0.0283037	-0.0289791	-0.0297053	-0.0304771	-0.0330191		27.2097	27.2097	27.2255	27.4496	28.1542	29.6936	30.352	31.0713	31.846	32.6707	35.3839
564.79	136	-0.0329513	-0.0329514	-0.0329709	-0.0332454	-0.0341058	-0.0359814	-0.0367835	-0.0376594	-0.0386019	-0.0396043	-0.0429036		-22.3509	-22.3509	-22.3642	-22.551	-23.1358	-24.4087	-24.9535	-25.5481	-26.1876	-26.8683	-29.1074
554.14	137	-0.0310908	-0.0310908	-0.0311117	-0.0313979	-0.0322669	-0.0341297	-0.0349195	-0.0357799	-0.0367035	-0.0376832	-0.0408995		0.178327	0.177762	0.178446	0.180088	0.185072	0.195757	0.200286	0.205222	0.210519	0.216138	0.234586
542.85	138	-0.0672099	-0.0672087	-0.0672633	-0.0679498	-0.0699742	-0.0742298	-0.0760189	-0.0779638	-0.0800443	-0.0822464	-0.0894491		0.549822	0.551061	0.551857	0.560307	0.582733	0.625358	0.643254	0.661021	0.681331	0.702641	0.773053
545.22	139	-0.0310178	-0.0310178	-0.0310421	-0.0313519	-0.0322723	-0.0342135	-0.0350317	-0.0359204	-0.036873	-0.0378802	-0.0411795		-4.47062	-4.47111	-4.47468	-4.51988	-4.65366	-4.93176	-5.04971	-5.17781	-5.31512	-5.46031	-5.93589
541.1	140	-0.0385389	-0.0385382	-0.0385703	-0.0389704	-0.0401445	-0.0426047	-0.043638	-0.0447599	-0.0459604	-0.0472307	-0.0513843		1.00301	1.00299	1.0028	1.00495	1.01846	1.05665	1.07404	1.09444	1.116	1.13936	1.21754
541.69	141	-0.0583831	-0.0583831	-0.0584313	-0.0590337	-0.0608049	-0.0645189	-0.0660801	-0.0677766	-0.069591	-0.0715098	-0.0777892		2.4585	2.4585	2.46052	2.48589	2.5593	2.71687	2.78261	2.85275	2.92912	3.01125	3.27568
540.44	142	-0.00861424	-0.00861424	-0.00862133	-0.00871146	-0.00897487	-0.00952635	-0.00975794	-0.0100093	-0.0102783	-0.0105629	-0.0114934		0.902303	0.902303	0.903221	0.912487	0.940077	0.998037	1.0223	1.04864	1.07682	1.10663	1.20388
540.23	143	-0.011574	-0.011574	-0.0115838	-0.0117049	-0.0120593	-0.0128011	-0.0131127	-0.0134508	-0.0138125	-0.0141951	-0.015446		-1.32322	-1.32322	-1.32436	-1.33843	-1.3794	-1.46469	-1.50078	-1.53968	-1.58129	-1.62529	-1.76905
538.99	144	-0.0345917	-0.0345911	-0.0346207	-0.0349871	-0.0360539	-0.0382826	-0.0392177	-0.0402323	-0.0413176	-0.0424655	-0.0462176		7.30183	7.30247	7.30762	7.38226	7.60194	8.06381	8.25813	8.4692	8.69516	8.93433	9.71597
537.53	145	-0.00425668	-0.00425668	-0.00426041	-0.00430607	-0.00443874	-0.00471513	-0.00483093	-0.00495662	-0.00509092	-0.00523293	-0.00569689		-2.80345	-2.80345	-2.80592	-2.83601	-2.92346	-3.10559	-3.18189	-3.2647	-3.35319	-3.44675	-3.75243
536.08	146	-0.0347583	-0.0347583	-0.0347894	-0.0351667	-0.0362594	-0.0385355	-0.0394878	-0.0405195	-0.0416223	-0.0427887	-0.0465956		-17.0299	-17.0299	-17.0452	-17.2309	-17.7678	-18.8876	-19.3558	-19.8626	-20.4039	-20.9771	-22.8463
535.83	147	-0.0286864	-0.0286864	-0.0287121	-0.0290248	-0.0299292	-0.0318083	-0.0325943	-0.0334465	-0.034358	-0.0353208	-0.0384648		6.86031	6.86031	6.86618	6.9386	7.15011	7.59629	7.78325	7.98527	8.20146	8.42991	9.17645
499.92	148	-0.014116	-0.0141162	-0.0141375	-0.0143516	-0.0149117	-0.0160093	-0.0164575	-0.0169388	-0.0174492	-0.0179851	-0.019718		-0.0529113	-0.0531938	-0.0533404	-0.0545775	-0.0574771	-0.0624517	-0.0648635	-0.067084	-0.0694147	-0.0718408	-0.0791867
492.79	149	-0.0467532	-0.0467524	-0.0468303	-0.0475882	-0.0495341	-0.0533009	-0.0548304	-0.0564699	-0.0582058	-0.0600261	-0.0658962		-0.83991	-0.838963	-0.840845	-0.857442	-0.898732	-0.974227	-1.00443	-1.03661	-1.07054	-1.10597	-1.21953
492.78	150	-0.0199521	-0.0199522	-0.0199854	-0.0203089	-0.0211389	-0.0227469	-0.0233996	-0.0240992	-0.02484	-0.0256169	-0.028122		-2.86002	-2.86002	-2.86497	-2.91245	-3.03343	-3.26723	-3.36182	-3.46314	-3.57036	-3.68275	-4.04442
492.06	151	-0.0160679	-0.016068	-0.016095	-0.0163571	-0.0170283	-0.018327	-0.0188541	-0.019419	-0.020017	-0.020644	-0.0226662		1.88654	1.88654	1.88972	1.92049	1.99969	2.1522	2.21409	2.28043	2.35066	2.42429	2.66124
490.93	152	-0.0371936	-0.0371936	-0.0372573	-0.03787	-0.0394356	-0.0424578	-0.0436834	-0.0449966	-0.0463865	-0.0478435	-0.0525398		-0.168911	-0.168912	-0.169799	-0.176261	-0.190751	-0.214078	-0.222984	-0.232306	-0.24198	-0.251951	-0.282175
442.89	153	-0.0310744	-0.0310739	-0.0311801	-0.0319746	-0.0337538	-0.036939	-0.0381893	-0.0395132	-0.0409005	-0.042343	-0.0469332		1.39566	1.39637	1.40079	1.43484	1.5114	1.65093	1.70588	1.76414	1.82526	1.88886	2.09263
440.66	154	-0.0248568	-0.0248564	-0.024944	-0.0255925	-0.0270357	-0.0296108	-0.0306202	-0.0316883	-0.0328072	-0.0339709	-0.0376697		-2.2019	-2.20135	-2.21012	-2.27225	-2.4074	-2.64601	-2.73817	-2.82872	-2.93033	-3.03659	-3.37085
440.68	155	0.00305877	0.00305878	0.00306957	0.00314936	0.00332696	0.00364385	0.00376806	0.00389951	0.00403729	0.0041804	0.00463567		2.82741	2.82743	2.8374	2.91116	3.07532	3.36824	3.48306	3.60455	3.73192	3.86421	4.28505
439.96	156	-0.0379238	-0.0379241	-0.0380591	-0.0390543	-0.0412655	-0.045207	-0.0467512	-0.0483977	-0.0501117	-0.0518916	-0.0575515		-0.677015	-0.677019	-0.680278	-0.697196	-0.737591	-0.808042	-0.835645	-0.876307	-0.909409	-0.942601	-1.04783
438.73	157	-0.0174273	-0.0174274	-0.0174906	-0.0179535	-0.0189777	-0.0208005	-0.0215145	-0.0222693	-0.0230596	-0.0238808	-0.0264918		-3.17094	-3.17096	-3.18295	-3.26943	-3.4593	-3.7957	-3.92724	-4.06617	-4.21158	-4.36257	-4.84234
410.85	158	-0.01963	-0.0196302	-0.0197366	-0.0204079	-0.0217854	-0.0241353	-0.0250392	-0.0259884	-0.0269778	-0.0280012	-0.0312336		-0.94057	-0.940584	-0.945679	-0.977847	-1.04385	-1.15644	-1.19975	-1.24463	-1.29202	-1.34103	-1.49656
410.77	159	-0.0239356	-0.0239359	-0.0240656	-0.0248842	-0.0265638	-0.0294291	-0.0305312	-0.0316895	-0.0328959	-0.0341437	-0.0380843		-0.469927	-0.469933	-0.472479	-0.488551	-0.521526	-0.577781	-0.599419	-0.622159	-0.645844	-0.670344	-0.747709
410.45	160	-0.0192903	-0.0192906	-0.0193958	-0.0200581	-0.0214155	-0.0237291	-0.024619	-0.0255541	-0.026528	-0.0275353	-0.0307158		3.30064	3.30068	3.31829	3.43008	3.66013	4.05377	4.20509	4.36415	4.52985	4.70128	5.24277
409.69	161	-0.0157595	-0.0157597	-0.0158465	-0.0163908	-0.017504	-0.0194006	-0.0201296	-0.0208956	-0.0216932	-0.0225181	-0.0251224		-1.23673	-1.23675	-1.24406	-1.28876	-1.37858	-1.53111	-1.58955	-1.65089	-1.71518	-1.78114	-1.98857
409.54	162	-0.0116995	-0.0116997	-0.0117643	-0.0121692	-0.012997	-0.0144066	-0.0149479	-0.0155171	-0.0161097	-0.0167226	-0.0186579		-1.28728	-1.28731	-1.29496	-1.34165	-1.43581	-1.59491	-1.6555	-1.71945	-1.78597	-1.85471	-2.0719
361.27	163	-0.0329215	-0.0329235	-0.0332876	-0.0350469	-0.038211	-0.0432379	-0.0451146	-0.0470659	-0.0490805	-0.0511477	-0.057605		-0.247514	-0.247542	-0.251418	-0.268072	-0.296228	-0.339447	-0.355347	-0.371792	-0.388697	-0.427385	-0.486201
360.6	164	-0.0163971	-0.0163981	-0.0165812	-0.0174626	-0.0190451	-0.021557	-0.0224945	-0.023469	-0.0244751	-0.025508	-0.0287321		0.754366	0.754413	0.762835	0.803385	0.876191	0.992379	1.03553	1.0804	1.126	1.17352	1.32185
360.47	165	-0.0182256	-0.0182262	-0.0184303	-0.0194119	-0.0211739	-0.023969	-0.0250119	-0.0260962	-0.0272147	-0.0283637	-0.0319351		0.409538	0.41007	0.414662	0.436747	0.475789	0.538596	0.562031	0.586395	0.6123	0.638152	0.733745
359.15	166	-0.0303089	-0.0303109	-0.0306568	-0.0323086	-0.0352634	-0.0399422	-0.0416855	-0.0434986	-0.0453697	-0.0472904	-0.0532819		-1.87676	-1.87691	-1.90139	-2.01278	-2.20821	-2.51236	-2.62399	-2.74094	-2.86144	-2.98619	-3.3695
346.68	167	-0.0262694	-0.0262718	-0.0266297	-0.0282275	-0.0309953	-0.0353074	-0.0369037	-0.0385587	-0.0402632	-0.0420099	-0.0474488		-0.278195	-0.278266	-0.285394	-0.31158	-0.352315	-0.412	-0.433514	-0.455605	-0.478178	-0.501155	-0.57197
345.7	168	-0.0135324	-0.0135336	-0.0137209	-0.0145521	-0.0159879	-0.0182214	-0.0190483	-0.0199049	-0.0207869	-0.0216907	-0.024504		1.75919	1.75935	1.78303	1.88924	2.07363	2.36122	2.46718	2.57826	2.69203	2.80862	3.17175
345.88	169	-0.0154902	-0.0154917	-0.0157054	-0.016655	-0.0182968	-0.0208507	-0.0217957	-0.0227753	-0.0237847	-0.0248184	-0.0280362		-2.29166	-2.29226	-2.32388	-2.46398	-2.70731	-3.08522	-3.22505	-3.36943	-3.51935	-3.67229	-4.14843
267.5	170	-0.0235013	-0.0235226	-0.024524	-0.0274129	-0.0315322	-0.0373454	-0.0394123	-0.0415251	-0.0436744	-0.0458572	-0.0525532		-0.61507	-0.615759	-0.645043	-0.726119	-0.839694	-0.99857	-1.05486	-1.11232	-1.16913	-1.22831	-1.40961
268.04	171	-0.0240033	-0.0240248	-0.0250411	-0.0279803	-0.0321755	-0.0380988	-0.0402053	-0.0423586	-0.0445493	-0.0467743	-0.0536001		0.586127	0.586513	0.608045	0.673963	0.770228	0.907653	0.956744	1.007	1.0599	1.11203	1.27223
267.64	172	-0.0177331	-0.0177492	-0.0185048	-0.0206847	-0.0237929	-0.0281804	-0.0297401	-0.0313344	-0.0329574	-0.0346046	-0.0396575		0.59594	0.59648	0.621872	0.695129	0.799584	0.945941	0.998297	1.05181	1.10629	1.16158	1.33273
267.6	173	-0.02163	-0.0216497	-0.0225713	-0.0252302	-0.0290215	-0.0343718	-0.0362742	-0.0382187	-0.0401984	-0.0422075	-0.0483723		6.58839	6.59453	6.87906	7.69569	8.85762	10.4956	11.0778	11.6728	12.2784	12.893	14.7762
266.45	174	-0.0297581	-0.0297859	-0.0310741	-0.0347679	-0.0400215	-0.0474264	-0.0500579	-0.0527474	-0.0554849	-0.0582629	-0.066783		-8.44995	-8.45836	-8.83572	-9.90509	-11.4185	-13.5463	-14.3018	-15.0736	-15.859	-16.6558	-19.0969

[truncated: 1 more sheets: Mode_assignment]
